# Supplementary material for: Associations between Heart Rate Variability and Brain Activity during a Working Memory Task: A Preliminary Electroencephalogram Study on Depression and Anxiety Disorder
Source: MDPI journal article supplement (doi:10.3390/brainsci12020172), 2022-01-28
Supplement: s1 [file s1]

**Supplementary Table S1. Paired t-test results for comparison between rest period and working memory performance (delta frequency band).**

|            |      | Group 1. Depressive disorder |         |          |         | Group 2. Anxiety disorder |         |          |         |
|------------|------|------------------------------|---------|----------|---------|---------------------------|---------|----------|---------|
| Electrodes |      | Absolute                     |         | Relative |         | Absolute                  |         | Relative |         |
| No.        | Name | t                            | p (FDR) | t        | p (FDR) | t                         | p (FDR) | t        | p (FDR) |
| 01         | AF4  | 0.511                        | 0.741   | -1.567   | 0.404   | -1.555                    | 0.190   | -1.815   | 0.128   |
| 02         | F2   | 0.189                        | 0.932   | -1.158   | 0.408   | -1.969                    | 0.190   | -1.895   | 0.119   |
| 03         | FCz  | -1.886                       | 0.316   | -1.087   | 0.418   | -1.949                    | 0.190   | -0.985   | 0.374   |
| 04         | Fp2  | -0.259                       | 0.889   | -1.713   | 0.404   | -1.393                    | 0.218   | -1.531   | 0.196   |
| 05         | Fz   | 0.005                        | 0.995   | -0.895   | 0.454   | -1.321                    | 0.232   | -1.289   | 0.250   |
| 06         | FC1  | -0.643                       | 0.709   | -1.185   | 0.404   | -1.538                    | 0.190   | -2.302   | 0.085   |
| 07         | AFz  | -0.124                       | 0.951   | -1.409   | 0.404   | -1.606                    | 0.190   | -1.439   | 0.227   |
| 08         | F1   | -0.293                       | 0.877   | -1.017   | 0.431   | -2.644                    | 0.190   | -2.361   | 0.085   |
| 09         | Fp1  | -0.090                       | 0.962   | -0.651   | 0.578   | -2.244                    | 0.190   | -2.112   | 0.092   |
| 10         | AF3  | -0.066                       | 0.963   | -1.284   | 0.404   | -1.560                    | 0.190   | -2.446   | 0.085   |
| 11         | F3   | 0.145                        | 0.951   | -1.676   | 0.404   | -1.096                    | 0.303   | -1.854   | 0.126   |
| 12         | F5   | -1.139                       | 0.536   | -2.003   | 0.404   | -1.860                    | 0.190   | -1.911   | 0.119   |
| 13         | FC5  | -0.859                       | 0.623   | -1.203   | 0.404   | -1.899                    | 0.190   | -2.346   | 0.085   |
| 14         | FC3  | -1.057                       | 0.578   | -1.123   | 0.418   | -1.942                    | 0.190   | -2.666   | 0.078   |
| 15         | C1   | -0.727                       | 0.704   | -1.591   | 0.404   | -1.866                    | 0.190   | -2.657   | 0.078   |
| 16         | F7   | -1.552                       | 0.380   | -2.066   | 0.404   | -1.589                    | 0.190   | -2.153   | 0.092   |
| 17         | FT7  | -1.919                       | 0.316   | -1.710   | 0.404   | -1.058                    | 0.316   | -1.582   | 0.188   |
| 18         | C3   | -0.919                       | 0.623   | -1.246   | 0.404   | -2.173                    | 0.190   | -3.002   | 0.078   |
| 19         | CP1  | -0.562                       | 0.741   | -1.679   | 0.404   | -1.516                    | 0.190   | -2.210   | 0.092   |
| 20         | C5   | -1.398                       | 0.432   | -1.504   | 0.404   | -1.779                    | 0.190   | -2.094   | 0.092   |
| 21         | T3   | -1.918                       | 0.316   | -1.204   | 0.404   | -1.343                    | 0.228   | -2.644   | 0.078   |
| 22         | TP7  | -1.868                       | 0.316   | -1.661   | 0.404   | -1.979                    | 0.190   | -2.140   | 0.092   |
| 23         | CP5  | -1.270                       | 0.476   | -1.684   | 0.404   | -2.056                    | 0.190   | -2.157   | 0.092   |
| 24         | P5   | -1.432                       | 0.426   | -1.363   | 0.404   | -2.243                    | 0.190   | -2.258   | 0.087   |
| 25         | P3   | -0.974                       | 0.594   | -1.438   | 0.404   | -2.376                    | 0.190   | -2.293   | 0.085   |
| 26         | A1   | -1.605                       | 0.380   | -1.673   | 0.404   | -1.628                    | 0.190   | -3.053   | 0.078   |
| 27         | T5   | -1.739                       | 0.354   | -1.046   | 0.426   | -2.119                    | 0.190   | -2.426   | 0.085   |
| 28         | P1   | -0.850                       | 0.623   | -1.267   | 0.404   | -0.972                    | 0.340   | -0.612   | 0.552   |

|    |     |        |       |        |       |        |       |        |       |
|----|-----|--------|-------|--------|-------|--------|-------|--------|-------|
| 29 | P9  | -2.300 | 0.316 | -0.858 | 0.467 | -2.241 | 0.190 | -2.302 | 0.085 |
| 30 | PO3 | -0.839 | 0.623 | -1.302 | 0.404 | -1.104 | 0.303 | -0.620 | 0.552 |
| 31 | Pz  | -0.649 | 0.709 | -1.338 | 0.404 | -1.016 | 0.324 | -0.894 | 0.411 |
| 32 | O1  | -1.705 | 0.354 | -0.349 | 0.782 | -1.805 | 0.190 | -1.044 | 0.349 |
| 33 | POz | -0.895 | 0.623 | -1.372 | 0.404 | -0.891 | 0.376 | -0.451 | 0.652 |
| 34 | Oz  | -2.192 | 0.316 | -0.662 | 0.578 | -1.214 | 0.266 | -0.920 | 0.403 |
| 35 | PO4 | -0.399 | 0.803 | -0.893 | 0.454 | -1.023 | 0.324 | -0.815 | 0.449 |
| 36 | O2  | -1.870 | 0.316 | 0.092  | 0.926 | -1.636 | 0.190 | -1.537 | 0.196 |
| 37 | P2  | -1.763 | 0.354 | -1.224 | 0.404 | -1.609 | 0.190 | -1.399 | 0.232 |
| 38 | CP2 | -0.621 | 0.711 | -0.258 | 0.820 | -1.507 | 0.190 | -0.669 | 0.534 |
| 39 | P4  | -1.128 | 0.536 | -1.182 | 0.404 | -1.924 | 0.190 | -1.897 | 0.119 |
| 40 | P10 | -1.983 | 0.316 | -0.298 | 0.808 | -2.169 | 0.190 | -2.031 | 0.098 |
| 41 | T6  | -1.027 | 0.586 | 0.247  | 0.820 | -2.353 | 0.190 | -2.464 | 0.085 |
| 42 | P6  | -1.515 | 0.384 | -0.904 | 0.454 | -1.700 | 0.190 | -1.714 | 0.153 |
| 43 | CP6 | -1.304 | 0.468 | -1.359 | 0.404 | -1.669 | 0.190 | -1.343 | 0.238 |
| 44 | A2  | -2.772 | 0.316 | -1.397 | 0.404 | -1.949 | 0.190 | -2.850 | 0.078 |
| 45 | TP8 | -2.418 | 0.316 | -1.247 | 0.404 | -1.554 | 0.190 | -2.127 | 0.092 |
| 46 | C6  | -1.548 | 0.380 | -1.075 | 0.418 | -1.639 | 0.190 | -1.822 | 0.128 |
| 47 | C4  | -1.223 | 0.495 | -0.894 | 0.454 | -1.688 | 0.190 | -2.078 | 0.092 |
| 48 | C2  | -0.491 | 0.741 | -0.761 | 0.522 | -1.697 | 0.190 | -1.422 | 0.228 |
| 49 | T4  | -2.106 | 0.316 | -1.092 | 0.418 | -1.424 | 0.211 | -2.627 | 0.078 |
| 50 | FC4 | -0.981 | 0.594 | -1.006 | 0.431 | -1.618 | 0.190 | -1.346 | 0.238 |
| 51 | FC2 | -0.495 | 0.741 | -0.632 | 0.580 | -1.283 | 0.242 | -1.300 | 0.250 |
| 52 | FT8 | -2.386 | 0.316 | -2.243 | 0.404 | -1.699 | 0.190 | -1.360 | 0.238 |
| 53 | FC6 | -1.554 | 0.380 | -1.758 | 0.404 | -1.382 | 0.218 | -1.206 | 0.276 |
| 54 | F8  | -1.306 | 0.468 | -2.330 | 0.404 | -1.526 | 0.190 | -2.801 | 0.078 |
| 55 | F6  | -0.670 | 0.709 | -1.893 | 0.404 | -1.818 | 0.190 | -1.607 | 0.184 |
| 56 | F4  | 0.524  | 0.741 | -1.616 | 0.404 | -1.426 | 0.211 | -2.527 | 0.085 |
| 57 | Cz  | -0.651 | 0.709 | -0.901 | 0.454 | -1.125 | 0.302 | -1.230 | 0.270 |

---

**Supplementary Table S2. Paired t-test results for comparison between rest period and working memory performance (theta frequency band).**

|            |      | Group 1. Depressive disorder |         |          |         | Group 2. Anxiety disorder |         |          |         |
|------------|------|------------------------------|---------|----------|---------|---------------------------|---------|----------|---------|
| Electrodes |      | Absolute                     |         | Relative |         | Absolute                  |         | Relative |         |
| No.        | Name | t                            | p (FDR) | t        | p (FDR) | t                         | p (FDR) | t        | p (FDR) |
| 01         | AF4  | 0.674                        | 0.734   | -0.879   | 0.909   | -1.841                    | 0.149   | -0.998   | 0.707   |
| 02         | F2   | 0.078                        | 0.956   | -1.087   | 0.909   | -2.870                    | 0.086   | -1.161   | 0.665   |
| 03         | FCz  | -2.199                       | 0.182   | -0.478   | 0.909   | -2.317                    | 0.125   | -1.241   | 0.665   |
| 04         | Fp2  | 0.345                        | 0.868   | -0.618   | 0.909   | -1.374                    | 0.239   | -1.371   | 0.665   |
| 05         | Fz   | -0.207                       | 0.908   | -2.106   | 0.909   | -1.476                    | 0.212   | -2.010   | 0.665   |
| 06         | FC1  | -0.359                       | 0.868   | 0.991    | 0.909   | -1.601                    | 0.200   | -0.960   | 0.720   |
| 07         | AFz  | 0.225                        | 0.908   | -0.603   | 0.909   | -2.758                    | 0.086   | -1.611   | 0.665   |
| 08         | F1   | -0.926                       | 0.684   | -1.001   | 0.909   | -3.142                    | 0.086   | -1.515   | 0.665   |
| 09         | Fp1  | 0.197                        | 0.908   | -0.411   | 0.909   | -1.908                    | 0.149   | -1.947   | 0.665   |
| 10         | AF3  | 0.260                        | 0.906   | 0.124    | 0.969   | -1.949                    | 0.149   | -0.881   | 0.735   |
| 11         | F3   | 0.855                        | 0.701   | 0.827    | 0.909   | -1.162                    | 0.291   | -1.586   | 0.665   |
| 12         | F5   | -0.771                       | 0.701   | 0.937    | 0.909   | -2.197                    | 0.141   | -1.038   | 0.692   |
| 13         | FC5  | -0.394                       | 0.860   | 0.908    | 0.909   | -2.098                    | 0.143   | -0.769   | 0.744   |
| 14         | FC3  | -0.416                       | 0.859   | 1.120    | 0.909   | -1.369                    | 0.239   | -0.307   | 0.804   |
| 15         | C1   | 0.010                        | 0.991   | 1.058    | 0.909   | -1.269                    | 0.254   | -0.276   | 0.804   |
| 16         | F7   | -0.834                       | 0.701   | 0.863    | 0.909   | -1.313                    | 0.252   | -0.316   | 0.804   |
| 17         | FT7  | -1.472                       | 0.430   | 0.939    | 0.909   | -1.595                    | 0.200   | -0.872   | 0.735   |
| 18         | C3   | -0.310                       | 0.881   | 1.610    | 0.909   | -1.538                    | 0.205   | 0.397    | 0.804   |
| 19         | CP1  | 0.075                        | 0.956   | 0.504    | 0.909   | -1.190                    | 0.284   | -0.749   | 0.744   |
| 20         | C5   | -0.720                       | 0.730   | 1.412    | 0.909   | -1.872                    | 0.149   | -0.357   | 0.804   |
| 21         | T3   | -1.559                       | 0.415   | 0.850    | 0.909   | -1.056                    | 0.312   | 1.157    | 0.665   |
| 22         | TP7  | -1.375                       | 0.468   | 0.645    | 0.909   | -1.773                    | 0.166   | 0.278    | 0.804   |
| 23         | CP5  | -0.779                       | 0.701   | 1.023    | 0.909   | -1.968                    | 0.149   | -0.520   | 0.804   |
| 24         | P5   | -1.339                       | 0.468   | 0.478    | 0.909   | -2.111                    | 0.143   | -0.506   | 0.804   |
| 25         | P3   | -0.688                       | 0.734   | 0.027    | 0.986   | -2.417                    | 0.109   | -0.647   | 0.801   |
| 26         | A1   | -1.589                       | 0.415   | -0.445   | 0.909   | -1.112                    | 0.299   | -0.551   | 0.804   |
| 27         | T5   | -2.194                       | 0.182   | -0.699   | 0.909   | -1.721                    | 0.172   | -0.528   | 0.804   |
| 28         | P1   | -1.049                       | 0.653   | -0.669   | 0.909   | -1.353                    | 0.240   | -1.132   | 0.665   |

|    |     |        |       |        |       |        |       |        |       |
|----|-----|--------|-------|--------|-------|--------|-------|--------|-------|
| 29 | P9  | -2.655 | 0.182 | -0.470 | 0.909 | -1.921 | 0.149 | -0.362 | 0.804 |
| 30 | PO3 | -0.959 | 0.684 | -0.945 | 0.909 | -1.435 | 0.223 | -1.915 | 0.665 |
| 31 | Pz  | -0.569 | 0.794 | -0.848 | 0.909 | -1.080 | 0.306 | -1.424 | 0.665 |
| 32 | O1  | -2.537 | 0.182 | 0.215  | 0.909 | -3.016 | 0.086 | -1.317 | 0.665 |
| 33 | POz | -0.922 | 0.684 | -0.510 | 0.909 | -1.147 | 0.292 | -1.731 | 0.665 |
| 34 | Oz  | -2.770 | 0.182 | 0.048  | 0.986 | -2.107 | 0.143 | -1.590 | 0.665 |
| 35 | PO4 | -0.422 | 0.859 | -0.309 | 0.909 | -1.275 | 0.254 | -1.938 | 0.665 |
| 36 | O2  | -2.255 | 0.182 | 0.217  | 0.909 | -2.702 | 0.086 | -1.080 | 0.676 |
| 37 | P2  | -1.645 | 0.413 | -0.036 | 0.986 | -2.413 | 0.109 | -1.487 | 0.665 |
| 38 | CP2 | -1.246 | 0.516 | -0.281 | 0.909 | -1.855 | 0.149 | -1.292 | 0.665 |
| 39 | P4  | -1.489 | 0.430 | -0.696 | 0.909 | -2.712 | 0.086 | -1.291 | 0.665 |
| 40 | P10 | -2.357 | 0.182 | -0.313 | 0.909 | -2.237 | 0.138 | -0.322 | 0.804 |
| 41 | T6  | -2.066 | 0.223 | -0.593 | 0.909 | -2.412 | 0.109 | -0.692 | 0.778 |
| 42 | P6  | -1.785 | 0.347 | -0.655 | 0.909 | -2.428 | 0.109 | -1.181 | 0.665 |
| 43 | CP6 | -1.453 | 0.430 | -0.705 | 0.909 | -2.020 | 0.149 | -1.528 | 0.665 |
| 44 | A2  | -2.399 | 0.182 | 0.656  | 0.909 | -1.283 | 0.254 | -0.277 | 0.804 |
| 45 | TP8 | -2.631 | 0.182 | -0.341 | 0.909 | -1.542 | 0.205 | -0.897 | 0.735 |
| 46 | C6  | -1.950 | 0.265 | -0.225 | 0.909 | -1.676 | 0.182 | -1.118 | 0.665 |
| 47 | C4  | -1.628 | 0.413 | -0.839 | 0.909 | -1.561 | 0.205 | -0.350 | 0.804 |
| 48 | C2  | -0.494 | 0.825 | 0.430  | 0.909 | -1.734 | 0.172 | -1.272 | 0.665 |
| 49 | T4  | -1.113 | 0.615 | 0.765  | 0.909 | -1.001 | 0.321 | 0.386  | 0.804 |
| 50 | FC4 | -0.812 | 0.701 | -0.473 | 0.909 | -1.969 | 0.149 | -0.785 | 0.744 |
| 51 | FC2 | -0.886 | 0.697 | -0.472 | 0.909 | -1.882 | 0.149 | -0.841 | 0.743 |
| 52 | FT8 | -2.290 | 0.182 | -0.017 | 0.986 | -1.486 | 0.212 | -0.538 | 0.804 |
| 53 | FC6 | -1.328 | 0.468 | -0.220 | 0.909 | -1.487 | 0.212 | -0.497 | 0.804 |
| 54 | F8  | -0.616 | 0.769 | 0.504  | 0.909 | -1.027 | 0.317 | 0.496  | 0.804 |
| 55 | F6  | -0.504 | 0.825 | -0.357 | 0.909 | -1.994 | 0.149 | -0.754 | 0.744 |
| 56 | F4  | 0.981  | 0.684 | -0.277 | 0.909 | -1.021 | 0.317 | -0.107 | 0.916 |
| 57 | Cz  | -0.158 | 0.923 | 1.212  | 0.909 | -1.108 | 0.299 | -0.268 | 0.804 |

---

**Supplementary Table S3. Paired t-test results for comparison between rest period and working memory performance (alpha frequency band).**

|            |      | Group 1. Depressive disorder |         |          |         | Group 2. Anxiety disorder |         |          |         |
|------------|------|------------------------------|---------|----------|---------|---------------------------|---------|----------|---------|
| Electrodes |      | Absolute                     |         | Relative |         | Absolute                  |         | Relative |         |
| No.        | Name | t                            | p (FDR) | t        | p (FDR) | t                         | p (FDR) | t        | p (FDR) |
| 01         | AF4  | 1.030                        | 0.688   | 1.283    | 0.510   | -1.226                    | 0.543   | 0.968    | 0.400   |
| 02         | F2   | 0.229                        | 0.881   | 0.954    | 0.513   | -1.948                    | 0.543   | 0.994    | 0.394   |
| 03         | FCz  | -1.907                       | 0.388   | 0.924    | 0.513   | -1.363                    | 0.543   | 1.455    | 0.323   |
| 04         | Fp2  | 1.395                        | 0.564   | 1.895    | 0.510   | -1.127                    | 0.543   | 1.173    | 0.355   |
| 05         | Fz   | 0.858                        | 0.688   | 1.224    | 0.510   | -1.260                    | 0.543   | 1.255    | 0.343   |
| 06         | FC1  | 0.098                        | 0.922   | 1.275    | 0.510   | -0.484                    | 0.665   | 2.136    | 0.285   |
| 07         | AFz  | 1.011                        | 0.688   | 1.515    | 0.510   | -1.045                    | 0.543   | 1.408    | 0.323   |
| 08         | F1   | -0.361                       | 0.837   | 1.296    | 0.510   | -1.249                    | 0.543   | 1.702    | 0.285   |
| 09         | Fp1  | 1.653                        | 0.429   | 1.003    | 0.510   | -1.547                    | 0.543   | 2.030    | 0.285   |
| 10         | AF3  | 0.855                        | 0.688   | 1.370    | 0.510   | -1.337                    | 0.543   | 1.997    | 0.285   |
| 11         | F3   | 1.141                        | 0.688   | 1.507    | 0.510   | -1.054                    | 0.543   | 0.899    | 0.416   |
| 12         | F5   | -0.851                       | 0.688   | 2.199    | 0.510   | -1.028                    | 0.543   | 1.249    | 0.343   |
| 13         | FC5  | -0.371                       | 0.837   | 1.109    | 0.510   | -0.650                    | 0.603   | 1.498    | 0.323   |
| 14         | FC3  | -0.167                       | 0.900   | 1.016    | 0.510   | -0.135                    | 0.893   | 1.790    | 0.285   |
| 15         | C1   | 0.381                        | 0.837   | 1.105    | 0.510   | -0.564                    | 0.630   | 1.753    | 0.285   |
| 16         | F7   | -0.112                       | 0.922   | 1.295    | 0.510   | -1.431                    | 0.543   | 1.021    | 0.394   |
| 17         | FT7  | -1.109                       | 0.688   | 1.305    | 0.510   | -0.696                    | 0.594   | 1.123    | 0.370   |
| 18         | C3   | -0.454                       | 0.837   | 0.921    | 0.513   | -0.617                    | 0.603   | 1.864    | 0.285   |
| 19         | CP1  | 0.332                        | 0.845   | 1.387    | 0.510   | -0.739                    | 0.590   | 1.291    | 0.340   |
| 20         | C5   | -0.531                       | 0.831   | 1.002    | 0.510   | -1.089                    | 0.543   | 1.647    | 0.285   |
| 21         | T3   | -1.257                       | 0.676   | 1.031    | 0.510   | -1.232                    | 0.543   | 1.612    | 0.291   |
| 22         | TP7  | -0.877                       | 0.688   | 1.111    | 0.510   | -1.202                    | 0.543   | 1.686    | 0.285   |
| 23         | CP5  | -0.459                       | 0.837   | 1.230    | 0.510   | -0.889                    | 0.543   | 2.069    | 0.285   |
| 24         | P5   | -0.949                       | 0.688   | 0.999    | 0.510   | -1.218                    | 0.543   | 2.148    | 0.285   |
| 25         | P3   | -0.376                       | 0.837   | 1.130    | 0.510   | -1.647                    | 0.543   | 1.801    | 0.285   |
| 26         | A1   | -0.798                       | 0.704   | 1.517    | 0.510   | 0.235                     | 0.830   | 2.474    | 0.285   |
| 27         | T5   | -1.467                       | 0.535   | 0.979    | 0.511   | -1.297                    | 0.543   | 2.206    | 0.285   |
| 28         | P1   | -0.407                       | 0.837   | 1.582    | 0.510   | -0.996                    | 0.543   | 0.949    | 0.403   |

|    |     |        |       |        |       |        |       |       |       |
|----|-----|--------|-------|--------|-------|--------|-------|-------|-------|
| 29 | P9  | -2.138 | 0.341 | 0.523  | 0.701 | -0.625 | 0.603 | 1.963 | 0.285 |
| 30 | PO3 | -0.293 | 0.861 | 1.461  | 0.510 | -0.994 | 0.543 | 1.019 | 0.394 |
| 31 | Pz  | -0.247 | 0.881 | 1.351  | 0.510 | -0.944 | 0.543 | 0.651 | 0.546 |
| 32 | O1  | -2.110 | 0.341 | 0.648  | 0.630 | -0.775 | 0.585 | 1.317 | 0.340 |
| 33 | POz | -0.464 | 0.837 | 1.410  | 0.510 | -0.735 | 0.590 | 0.522 | 0.614 |
| 34 | Oz  | -1.832 | 0.398 | 1.081  | 0.510 | -0.873 | 0.543 | 1.000 | 0.394 |
| 35 | PO4 | 0.166  | 0.900 | 1.262  | 0.510 | -0.500 | 0.665 | 0.912 | 0.416 |
| 36 | O2  | -2.080 | 0.341 | 0.143  | 0.903 | -1.449 | 0.543 | 1.213 | 0.345 |
| 37 | P2  | -0.936 | 0.688 | 1.106  | 0.510 | -0.865 | 0.543 | 1.445 | 0.323 |
| 38 | CP2 | -1.800 | 0.398 | -0.353 | 0.795 | -0.992 | 0.543 | 0.561 | 0.598 |
| 39 | P4  | -0.914 | 0.688 | 1.389  | 0.510 | -1.315 | 0.543 | 1.701 | 0.285 |
| 40 | P10 | -2.141 | 0.341 | -0.330 | 0.799 | -1.228 | 0.543 | 1.214 | 0.345 |
| 41 | T6  | -2.371 | 0.341 | -0.300 | 0.808 | -0.967 | 0.543 | 1.475 | 0.323 |
| 42 | P6  | -1.007 | 0.688 | 0.870  | 0.526 | -1.135 | 0.543 | 1.337 | 0.340 |
| 43 | CP6 | -0.697 | 0.732 | 1.414  | 0.510 | -1.133 | 0.543 | 1.469 | 0.323 |
| 44 | A2  | -1.676 | 0.429 | 1.077  | 0.510 | 0.251  | 0.830 | 1.800 | 0.285 |
| 45 | TP8 | -2.018 | 0.343 | 0.905  | 0.513 | -0.709 | 0.594 | 1.769 | 0.285 |
| 46 | C6  | -2.080 | 0.341 | 0.841  | 0.535 | -1.154 | 0.543 | 1.368 | 0.335 |
| 47 | C4  | -1.644 | 0.429 | 0.672  | 0.630 | -1.169 | 0.543 | 1.287 | 0.340 |
| 48 | C2  | -1.144 | 0.688 | -0.021 | 0.983 | -0.671 | 0.600 | 1.661 | 0.285 |
| 49 | T4  | -1.458 | 0.535 | 0.167  | 0.899 | -0.913 | 0.543 | 2.188 | 0.285 |
| 50 | FC4 | -0.776 | 0.704 | 0.650  | 0.630 | -1.269 | 0.543 | 0.806 | 0.464 |
| 51 | FC2 | -0.748 | 0.704 | 0.406  | 0.767 | -0.789 | 0.585 | 1.410 | 0.323 |
| 52 | FT8 | -2.167 | 0.341 | 1.391  | 0.510 | -1.224 | 0.543 | 1.164 | 0.355 |
| 53 | FC6 | -1.018 | 0.688 | 1.142  | 0.510 | -1.594 | 0.543 | 0.284 | 0.778 |
| 54 | F8  | -0.640 | 0.766 | 0.563  | 0.684 | -1.038 | 0.543 | 1.957 | 0.285 |
| 55 | F6  | -0.535 | 0.831 | 1.137  | 0.510 | -1.717 | 0.543 | 0.765 | 0.481 |
| 56 | F4  | 1.082  | 0.688 | 0.728  | 0.608 | -0.935 | 0.543 | 1.098 | 0.370 |
| 57 | Cz  | -0.763 | 0.704 | 0.447  | 0.749 | -1.091 | 0.543 | 1.093 | 0.370 |

**Supplementary Table S4. Paired t-test results for comparison between rest period and working memory performance (beta frequency band).**

|            |      | Group 1. Depressive disorder |         |          |         | Group 2. Anxiety disorder |         |          |               |
|------------|------|------------------------------|---------|----------|---------|---------------------------|---------|----------|---------------|
| Electrodes |      | Absolute                     |         | Relative |         | Absolute                  |         | Relative |               |
| No.        | Name | t                            | p (FDR) | t        | p (FDR) | t                         | p (FDR) | t        | p (FDR)       |
| 01         | AF4  | 1.558                        | 0.820   | 2.627    | 0.087   | -0.415                    | 0.717   | 2.278    | <b>0.049*</b> |
| 02         | F2   | 1.225                        | 0.820   | 2.161    | 0.175   | -1.289                    | 0.533   | 2.463    | <b>0.037*</b> |
| 03         | FCz  | -0.702                       | 0.910   | 2.054    | 0.180   | -2.21                     | 0.354   | 0.537    | 0.593         |
| 04         | Fp2  | 1.27                         | 0.820   | 1.982    | 0.189   | -1.05                     | 0.533   | 2.533    | <b>0.035*</b> |
| 05         | Fz   | 1.364                        | 0.820   | 2.291    | 0.145   | -1.144                    | 0.533   | 1.795    | 0.114         |
| 06         | FC1  | 0.621                        | 0.910   | 0.393    | 0.696   | -1.149                    | 0.533   | 1.592    | 0.148         |
| 07         | AFz  | 1.263                        | 0.820   | 1.955    | 0.189   | -0.853                    | 0.539   | 2.066    | 0.070         |
| 08         | F1   | 1.175                        | 0.820   | 1.784    | 0.211   | -1.274                    | 0.533   | 2.955    | <b>0.022*</b> |
| 09         | Fp1  | 1.562                        | 0.820   | 1.106    | 0.339   | -1.747                    | 0.451   | 2.723    | <b>0.023*</b> |
| 10         | AF3  | 1.972                        | 0.820   | 1.528    | 0.250   | -1.096                    | 0.533   | 2.512    | <b>0.035*</b> |
| 11         | F3   | 1.875                        | 0.820   | 2.1      | 0.175   | -0.798                    | 0.542   | 3.254    | <b>0.018*</b> |
| 12         | F5   | 0.053                        | 0.975   | 1.947    | 0.189   | -0.858                    | 0.539   | 2.93     | <b>0.022*</b> |
| 13         | FC5  | 0.833                        | 0.894   | 1.385    | 0.269   | -0.728                    | 0.546   | 3.162    | <b>0.018*</b> |
| 14         | FC3  | 0.639                        | 0.910   | 0.855    | 0.442   | -0.416                    | 0.717   | 2.86     | <b>0.022*</b> |
| 15         | C1   | 1.064                        | 0.820   | 1.551    | 0.250   | -0.792                    | 0.542   | 2.785    | <b>0.023*</b> |
| 16         | F7   | 1.039                        | 0.820   | 2.85     | 0.068   | -0.969                    | 0.533   | 4.298    | <b>0.002*</b> |
| 17         | FT7  | 0.275                        | 0.966   | 1.741    | 0.211   | -0.543                    | 0.646   | 2.408    | <b>0.041*</b> |
| 18         | C3   | 0.469                        | 0.961   | 0.834    | 0.443   | -0.786                    | 0.542   | 2.828    | <b>0.023*</b> |
| 19         | CP1  | 1.139                        | 0.820   | 1.199    | 0.312   | -0.326                    | 0.759   | 3.106    | <b>0.019*</b> |
| 20         | C5   | 0.216                        | 0.966   | 1.019    | 0.371   | -1.294                    | 0.533   | 2.082    | 0.070         |
| 21         | T3   | -0.988                       | 0.820   | 1.352    | 0.269   | -0.853                    | 0.539   | 1.662    | 0.138         |
| 22         | TP7  | 0.136                        | 0.975   | 1.641    | 0.230   | -1.57                     | 0.463   | 1.629    | 0.141         |
| 23         | CP5  | 0.274                        | 0.966   | 1.219    | 0.309   | -1.256                    | 0.533   | 2.277    | <b>0.049*</b> |
| 24         | P5   | 0.185                        | 0.966   | 1.113    | 0.339   | -1.798                    | 0.451   | 2.325    | <b>0.046*</b> |
| 25         | P3   | 0.735                        | 0.910   | 1.045    | 0.364   | -1.805                    | 0.451   | 3.248    | <b>0.018*</b> |
| 26         | A1   | 0.19                         | 0.966   | 1.826    | 0.211   | -0.339                    | 0.759   | 1.63     | 0.141         |
| 27         | T5   | -0.283                       | 0.966   | 1.626    | 0.230   | -1.769                    | 0.451   | 1.988    | 0.082         |
| 28         | P1   | 0.274                        | 0.966   | 0.695    | 0.507   | -1.289                    | 0.533   | 1.531    | 0.158         |

|    |     |        |       |       |               |        |       |       |               |
|----|-----|--------|-------|-------|---------------|--------|-------|-------|---------------|
| 29 | P9  | -0.956 | 0.820 | 1.41  | 0.269         | -1.066 | 0.533 | 1.02  | 0.329         |
| 30 | PO3 | 0.722  | 0.910 | 1.358 | 0.269         | -1.205 | 0.533 | 1.535 | 0.158         |
| 31 | Pz  | 1.144  | 0.820 | 2.13  | 0.175         | -1.04  | 0.533 | 1.91  | 0.092         |
| 32 | O1  | -1.589 | 0.820 | 0.476 | 0.647         | -2.377 | 0.338 | 1.059 | 0.316         |
| 33 | POz | 0.717  | 0.910 | 1.772 | 0.211         | -1.107 | 0.533 | 1.358 | 0.205         |
| 34 | Oz  | -1.153 | 0.820 | 0.769 | 0.470         | -2.51  | 0.338 | 0.85  | 0.413         |
| 35 | PO4 | 0.846  | 0.894 | 0.827 | 0.443         | -1.11  | 0.533 | 1.34  | 0.207         |
| 36 | O2  | -1.581 | 0.820 | 0.902 | 0.423         | -2.378 | 0.338 | 1.923 | 0.092         |
| 37 | P2  | 0.022  | 0.982 | 1.538 | 0.250         | -1.997 | 0.451 | 1.515 | 0.158         |
| 38 | CP2 | -0.172 | 0.966 | 1.233 | 0.309         | -0.945 | 0.537 | 1.284 | 0.224         |
| 39 | P4  | 0.185  | 0.966 | 1.329 | 0.269         | -2.323 | 0.338 | 2.106 | 0.068         |
| 40 | P10 | -0.315 | 0.966 | 2.691 | 0.087         | -1.575 | 0.463 | 3.205 | <b>0.018*</b> |
| 41 | T6  | -0.616 | 0.910 | 1.161 | 0.324         | -1.697 | 0.451 | 4.263 | <b>0.002*</b> |
| 42 | P6  | 0.053  | 0.975 | 1.388 | 0.269         | -1.736 | 0.451 | 2.739 | <b>0.023*</b> |
| 43 | CP6 | 0.292  | 0.966 | 1.709 | 0.211         | -1.631 | 0.463 | 2.337 | <b>0.046*</b> |
| 44 | A2  | -1.303 | 0.820 | 1.378 | 0.269         | 0.087  | 0.931 | 2.884 | <b>0.022*</b> |
| 45 | TP8 | -0.612 | 0.910 | 1.74  | 0.211         | -0.759 | 0.546 | 3.252 | <b>0.018*</b> |
| 46 | C6  | -0.498 | 0.961 | 1.331 | 0.269         | -0.98  | 0.533 | 3.362 | <b>0.018*</b> |
| 47 | C4  | -0.116 | 0.975 | 1.476 | 0.267         | -0.987 | 0.533 | 3.029 | <b>0.021*</b> |
| 48 | C2  | 0.335  | 0.966 | 1.434 | 0.269         | -1.144 | 0.533 | 1.513 | 0.158         |
| 49 | T4  | 0.09   | 0.975 | 2.539 | 0.087         | -1.088 | 0.533 | 1.673 | 0.138         |
| 50 | FC4 | 0.951  | 0.820 | 1.778 | 0.211         | -0.887 | 0.539 | 2.789 | <b>0.023*</b> |
| 51 | FC2 | 0.471  | 0.961 | 1.712 | 0.211         | -1.464 | 0.530 | 0.787 | 0.442         |
| 52 | FT8 | 0.422  | 0.966 | 3.713 | <b>0.013*</b> | -0.782 | 0.542 | 2.19  | 0.058         |
| 53 | FC6 | 1.021  | 0.820 | 2.579 | 0.087         | -0.569 | 0.639 | 2.545 | <b>0.035*</b> |
| 54 | F8  | 1.724  | 0.820 | 4.663 | <b>0.001*</b> | -0.919 | 0.539 | 2.481 | <b>0.037*</b> |
| 55 | F6  | 1.236  | 0.820 | 3.193 | <b>0.032*</b> | -0.738 | 0.546 | 2.76  | <b>0.023*</b> |
| 56 | F4  | 2.141  | 0.820 | 3.581 | <b>0.013*</b> | -0.687 | 0.564 | 2.88  | <b>0.022*</b> |
| 57 | Cz  | 0.528  | 0.961 | 0.962 | 0.396         | -1.003 | 0.533 | 1.738 | 0.125         |



**Supplementary Table S5. Paired t-test results for comparison between rest period and working memory performance (gamma frequency band).**

|            |      | Group 1. Depressive disorder |         |          |         | Group 2. Anxiety disorder |         |          |         |
|------------|------|------------------------------|---------|----------|---------|---------------------------|---------|----------|---------|
| Electrodes |      | Absolute                     |         | Relative |         | Absolute                  |         | Relative |         |
| No.        | Name | t                            | p (FDR) | t        | p (FDR) | t                         | p (FDR) | t        | p (FDR) |
| 01         | AF4  | 1.129                        | 0.976   | 0.978    | 0.915   | -0.499                    | 0.654   | 1.29     | 0.827   |
| 02         | F2   | 0.955                        | 0.976   | 0.872    | 0.915   | -0.69                     | 0.565   | 1.925    | 0.827   |
| 03         | FCz  | -1.69                        | 0.976   | -0.497   | 0.931   | -1.955                    | 0.456   | -0.382   | 0.965   |
| 04         | Fp2  | 0.399                        | 0.976   | -1.09    | 0.915   | -1.174                    | 0.456   | 0.271    | 0.965   |
| 05         | Fz   | 0.532                        | 0.976   | -0.37    | 0.967   | -1.192                    | 0.456   | 1.004    | 0.827   |
| 06         | FC1  | 0.108                        | 0.976   | -0.919   | 0.915   | -1.141                    | 0.456   | 0.117    | 0.976   |
| 07         | AFz  | 0.896                        | 0.976   | 0.375    | 0.967   | -1.245                    | 0.456   | 0.69     | 0.827   |
| 08         | F1   | 0.086                        | 0.976   | -0.163   | 0.976   | -1.365                    | 0.456   | 1.461    | 0.827   |
| 09         | Fp1  | -0.711                       | 0.976   | -1.758   | 0.915   | -1.781                    | 0.456   | -0.023   | 0.982   |
| 10         | AF3  | 0.01                         | 0.992   | -0.58    | 0.915   | -1.288                    | 0.456   | 1.012    | 0.827   |
| 11         | F3   | -0.35                        | 0.976   | -1.345   | 0.915   | -0.986                    | 0.456   | 1.312    | 0.827   |
| 12         | F5   | -1.267                       | 0.976   | -0.994   | 0.915   | -0.727                    | 0.565   | 1.049    | 0.827   |
| 13         | FC5  | -0.299                       | 0.976   | -0.82    | 0.915   | -0.667                    | 0.567   | 1.207    | 0.827   |
| 14         | FC3  | 0.083                        | 0.976   | -0.614   | 0.915   | -0.196                    | 0.86    | 1.681    | 0.827   |
| 15         | C1   | 0.344                        | 0.976   | -0.228   | 0.976   | -0.531                    | 0.643   | 0.999    | 0.827   |
| 16         | F7   | -0.926                       | 0.976   | -0.081   | 0.977   | -1.228                    | 0.456   | 0.224    | 0.965   |
| 17         | FT7  | -0.374                       | 0.976   | -0.207   | 0.976   | -0.686                    | 0.565   | 0.828    | 0.827   |
| 18         | C3   | 0.051                        | 0.976   | -0.888   | 0.915   | -0.760                    | 0.563   | 1.295    | 0.827   |
| 19         | CP1  | 0.726                        | 0.976   | 0.379    | 0.967   | -0.560                    | 0.633   | 0.702    | 0.827   |
| 20         | C5   | 0.174                        | 0.976   | -0.208   | 0.976   | -1.242                    | 0.456   | 0.518    | 0.96    |
| 21         | T3   | -1.303                       | 0.976   | -1.027   | 0.915   | -1.039                    | 0.456   | -0.629   | 0.866   |
| 22         | TP7  | 0.198                        | 0.976   | 0.325    | 0.967   | -1.538                    | 0.456   | 0.267    | 0.965   |
| 23         | CP5  | 0.253                        | 0.976   | 0.048    | 0.977   | -1.849                    | 0.456   | 0.048    | 0.979   |
| 24         | P5   | 0.169                        | 0.976   | 0.675    | 0.915   | -2.122                    | 0.456   | -0.172   | 0.965   |
| 25         | P3   | 0.678                        | 0.976   | 0.855    | 0.915   | -2.446                    | 0.456   | 0.070    | 0.979   |
| 26         | A1   | 0.420                        | 0.976   | 0.536    | 0.915   | -0.280                    | 0.809   | 1.219    | 0.827   |
| 27         | T5   | -0.570                       | 0.976   | -0.138   | 0.976   | -1.703                    | 0.456   | 0.159    | 0.965   |
| 28         | P1   | 0.092                        | 0.976   | 0.15     | 0.976   | -1.375                    | 0.456   | -1.201   | 0.827   |

|    |     |        |       |        |       |        |       |        |       |
|----|-----|--------|-------|--------|-------|--------|-------|--------|-------|
| 29 | P9  | -0.918 | 0.976 | 0.351  | 0.967 | -0.702 | 0.565 | 1.277  | 0.827 |
| 30 | PO3 | 0.524  | 0.976 | -0.031 | 0.977 | -1.114 | 0.456 | 0.199  | 0.965 |
| 31 | Pz  | 0.568  | 0.976 | -0.616 | 0.915 | -0.998 | 0.456 | 0.338  | 0.965 |
| 32 | O1  | -2.156 | 0.668 | -1.532 | 0.915 | -2.079 | 0.456 | -0.29  | 0.965 |
| 33 | POz | 0.327  | 0.976 | -0.967 | 0.915 | -0.753 | 0.563 | 0.999  | 0.827 |
| 34 | Oz  | -2.467 | 0.470 | -2.108 | 0.915 | -1.747 | 0.456 | 0.718  | 0.827 |
| 35 | PO4 | 0.111  | 0.976 | -1.371 | 0.915 | -1.031 | 0.456 | 0.949  | 0.827 |
| 36 | O2  | -2.655 | 0.470 | -2.34  | 0.915 | -1.48  | 0.456 | 0.845  | 0.827 |
| 37 | P2  | -0.518 | 0.976 | -0.622 | 0.915 | -1.732 | 0.456 | 0.806  | 0.827 |
| 38 | CP2 | -0.097 | 0.976 | 0.547  | 0.915 | -0.898 | 0.494 | 0.437  | 0.965 |
| 39 | P4  | -0.063 | 0.976 | 0.055  | 0.977 | -1.728 | 0.456 | 0.904  | 0.827 |
| 40 | P10 | -1.424 | 0.976 | -0.563 | 0.915 | -1.69  | 0.456 | 0.253  | 0.965 |
| 41 | T6  | -1.523 | 0.976 | -1.054 | 0.915 | -1.484 | 0.456 | 0.734  | 0.827 |
| 42 | P6  | -0.531 | 0.976 | 0.177  | 0.976 | -1.4   | 0.456 | 0.703  | 0.827 |
| 43 | CP6 | -0.189 | 0.976 | 0.59   | 0.915 | -1.456 | 0.456 | 0.241  | 0.965 |
| 44 | A2  | -1.797 | 0.976 | -0.342 | 0.967 | -0.174 | 0.863 | 0.898  | 0.827 |
| 45 | TP8 | -1.159 | 0.976 | 0.816  | 0.915 | -1.076 | 0.456 | 0.258  | 0.965 |
| 46 | C6  | -1.000 | 0.976 | 0.758  | 0.915 | -1.033 | 0.456 | 0.740  | 0.827 |
| 47 | C4  | -0.509 | 0.976 | 0.893  | 0.915 | -0.998 | 0.456 | 0.756  | 0.827 |
| 48 | C2  | 0.249  | 0.976 | 0.545  | 0.915 | -1.411 | 0.456 | 0.079  | 0.979 |
| 49 | T4  | -1.609 | 0.976 | -0.613 | 0.915 | -1.316 | 0.456 | -0.846 | 0.827 |
| 50 | FC4 | 0.288  | 0.976 | 0.619  | 0.915 | -1.203 | 0.456 | 0.396  | 0.965 |
| 51 | FC2 | -0.148 | 0.976 | 0.03   | 0.977 | -1.236 | 0.456 | 0.151  | 0.965 |
| 52 | FT8 | -0.537 | 0.976 | 1.115  | 0.915 | -1.516 | 0.456 | -0.325 | 0.965 |
| 53 | FC6 | 0.413  | 0.976 | 1.187  | 0.915 | -0.867 | 0.505 | 0.882  | 0.827 |
| 54 | F8  | 0.373  | 0.976 | 1.661  | 0.915 | -1.27  | 0.456 | -0.991 | 0.827 |
| 55 | F6  | 0.654  | 0.976 | 1.227  | 0.915 | -0.921 | 0.489 | 1.197  | 0.827 |
| 56 | F4  | 1.082  | 0.976 | 0.269  | 0.976 | -1.001 | 0.456 | 1.198  | 0.827 |
| 57 | Cz  | -0.172 | 0.976 | -1.392 | 0.915 | -1.136 | 0.456 | -1.579 | 0.827 |

**Supplementary Table S6. Correlation analysis result of delta absolute power and LF-HRV.**

|            |      | Group 1. Depressive disorder |         |       |               | Group 2. Anxiety disorder |         |        |         |
|------------|------|------------------------------|---------|-------|---------------|---------------------------|---------|--------|---------|
| Electrodes |      | Resting                      |         | Task  |               | Resting                   |         | Task   |         |
| No.        | Name | r                            | p (FDR) | r     | p (FDR)       | r                         | p (FDR) | r      | p (FDR) |
| 01         | AF4  | -0.194                       | 0.643   | 0.408 | <b>0.006*</b> | 0.036                     | 0.862   | -0.165 | 0.457   |
| 02         | F2   | -0.173                       | 0.665   | 0.445 | <b>0.002*</b> | -0.047                    | 0.875   | -0.163 | 0.708   |
| 03         | FCz  | 0.048                        | 0.726   | 0.305 | 0.072         | 0.014                     | 0.956   | -0.030 | 0.957   |
| 04         | Fp2  | -0.176                       | 0.482   | 0.341 | <b>0.033*</b> | 0.059                     | 0.846   | -0.104 | 0.653   |
| 05         | Fz   | -0.148                       | 0.512   | 0.407 | <b>0.008*</b> | -0.014                    | 0.951   | -0.102 | 0.684   |
| 06         | FC1  | -0.187                       | 0.612   | 0.238 | 0.253         | 0.131                     | 0.950   | 0.030  | 0.947   |
| 07         | AFz  | -0.239                       | 0.248   | 0.502 | <b>0.001*</b> | 0.067                     | 0.794   | -0.023 | 0.982   |
| 08         | F1   | -0.075                       | 0.948   | 0.355 | <b>0.022*</b> | 0.114                     | 0.895   | -0.088 | 0.854   |
| 09         | Fp1  | -0.020                       | 0.958   | 0.356 | <b>0.023*</b> | 0.072                     | 0.956   | -0.108 | 0.575   |
| 10         | AF3  | -0.085                       | 0.989   | 0.416 | <b>0.006*</b> | 0.076                     | 0.843   | -0.114 | 0.761   |
| 11         | F3   | -0.005                       | 0.995   | 0.339 | <b>0.033*</b> | 0.020                     | 0.923   | -0.129 | 0.690   |
| 12         | F5   | -0.048                       | 0.887   | 0.365 | <b>0.018*</b> | 0.130                     | 0.918   | -0.142 | 0.664   |
| 13         | FC5  | -0.043                       | 0.892   | 0.359 | <b>0.017*</b> | 0.091                     | 0.915   | -0.148 | 0.743   |
| 14         | FC3  | -0.117                       | 0.779   | 0.348 | <b>0.028*</b> | 0.092                     | 0.984   | -0.026 | 1.000   |
| 15         | C1   | -0.138                       | 0.700   | 0.327 | 0.060         | 0.112                     | 0.861   | 0.003  | 0.983   |
| 16         | F7   | 0.125                        | 0.516   | 0.295 | 0.089         | 0.074                     | 0.971   | -0.147 | 0.707   |
| 17         | FT7  | -0.008                       | 0.968   | 0.377 | <b>0.018*</b> | 0.036                     | 0.938   | -0.127 | 0.885   |
| 18         | C3   | -0.125                       | 0.863   | 0.337 | <b>0.048*</b> | 0.062                     | 0.812   | -0.097 | 0.976   |
| 19         | CP1  | -0.142                       | 0.622   | 0.296 | 0.087         | 0.151                     | 0.893   | 0.021  | 0.946   |
| 20         | C5   | -0.023                       | 0.865   | 0.378 | <b>0.014*</b> | 0.035                     | 0.862   | -0.004 | 0.986   |
| 21         | T3   | 0.149                        | 0.497   | 0.154 | 0.479         | 0.005                     | 0.969   | -0.104 | 0.913   |
| 22         | TP7  | -0.029                       | 0.831   | 0.363 | <b>0.019*</b> | 0.079                     | 0.867   | -0.025 | 0.871   |
| 23         | CP5  | -0.054                       | 0.951   | 0.387 | <b>0.014*</b> | 0.089                     | 0.854   | -0.006 | 0.969   |
| 24         | P5   | -0.037                       | 0.992   | 0.412 | <b>0.008*</b> | 0.189                     | 0.783   | 0.036  | 0.927   |
| 25         | P3   | -0.053                       | 0.994   | 0.391 | <b>0.012*</b> | 0.147                     | 0.908   | 0.020  | 0.957   |
| 26         | A1   | 0.005                        | 0.974   | 0.261 | 0.269         | 0.054                     | 0.891   | -0.018 | 0.946   |
| 27         | T5   | -0.083                       | 0.929   | 0.251 | 0.201         | 0.154                     | 0.900   | -0.023 | 0.920   |
| 28         | P1   | -0.055                       | 0.812   | 0.336 | <b>0.049*</b> | 0.032                     | 0.953   | -0.019 | 0.963   |
| 29         | P9   | 0.002                        | 0.987   | 0.315 | 0.059         | 0.192                     | 0.629   | 0.045  | 0.986   |

|    |     |        |       |       |               |        |       |        |       |
|----|-----|--------|-------|-------|---------------|--------|-------|--------|-------|
| 30 | PO3 | -0.109 | 0.612 | 0.362 | <b>0.026*</b> | 0.124  | 0.782 | -0.019 | 0.928 |
| 31 | Pz  | -0.095 | 0.789 | 0.298 | 0.111         | 0.123  | 0.829 | -0.065 | 0.900 |
| 32 | O1  | -0.006 | 0.963 | 0.254 | 0.154         | 0.148  | 0.603 | 0.052  | 0.980 |
| 33 | POz | -0.100 | 0.642 | 0.334 | 0.052         | 0.156  | 0.679 | -0.047 | 0.940 |
| 34 | Oz  | -0.014 | 0.918 | 0.201 | 0.450         | 0.175  | 0.503 | 0.002  | 0.991 |
| 35 | PO4 | 0.030  | 0.942 | 0.377 | <b>0.018*</b> | 0.149  | 0.613 | -0.040 | 0.955 |
| 36 | O2  | -0.016 | 0.962 | 0.245 | 0.222         | 0.186  | 0.388 | -0.017 | 0.997 |
| 37 | P2  | 0.015  | 0.912 | 0.393 | <b>0.016*</b> | 0.065  | 0.702 | -0.063 | 0.848 |
| 38 | CP2 | 0.016  | 0.907 | 0.426 | <b>0.005*</b> | 0.099  | 0.851 | -0.030 | 0.980 |
| 39 | P4  | -0.041 | 0.893 | 0.397 | <b>0.011*</b> | 0.103  | 0.802 | -0.093 | 0.979 |
| 40 | P10 | -0.092 | 0.913 | 0.298 | 0.083         | 0.126  | 0.897 | -0.031 | 0.932 |
| 41 | T6  | -0.012 | 0.940 | 0.373 | <b>0.015*</b> | 0.158  | 0.785 | -0.031 | 0.894 |
| 42 | P6  | -0.021 | 0.990 | 0.409 | <b>0.007*</b> | 0.152  | 0.976 | -0.007 | 0.997 |
| 43 | CP6 | -0.004 | 0.975 | 0.406 | <b>0.008*</b> | 0.203  | 0.637 | -0.011 | 0.954 |
| 44 | A2  | -0.017 | 0.938 | 0.356 | <b>0.034*</b> | 0.174  | 0.966 | 0.006  | 0.967 |
| 45 | TP8 | 0.062  | 0.914 | 0.383 | <b>0.015*</b> | 0.107  | 0.968 | -0.054 | 0.925 |
| 46 | C6  | 0.033  | 0.993 | 0.412 | <b>0.007*</b> | 0.122  | 0.949 | -0.066 | 0.978 |
| 47 | C4  | 0.000  | 0.999 | 0.316 | 0.058         | 0.129  | 0.823 | -0.062 | 0.997 |
| 48 | C2  | -0.065 | 0.747 | 0.283 | 0.113         | 0.030  | 0.896 | -0.041 | 0.910 |
| 49 | T4  | 0.205  | 0.561 | 0.321 | 0.051         | 0.115  | 0.792 | -0.127 | 0.850 |
| 50 | FC4 | 0.030  | 0.893 | 0.397 | <b>0.008*</b> | 0.021  | 0.882 | -0.107 | 0.871 |
| 51 | FC2 | -0.024 | 0.947 | 0.230 | 0.274         | -0.026 | 0.920 | -0.063 | 0.966 |
| 52 | FT8 | 0.023  | 0.892 | 0.312 | 0.063         | 0.026  | 0.977 | -0.174 | 0.693 |
| 53 | FC6 | 0.036  | 0.885 | 0.408 | <b>0.006*</b> | 0.014  | 0.918 | -0.148 | 0.837 |
| 54 | F8  | 0.097  | 0.698 | 0.291 | 0.077         | 0.049  | 0.966 | -0.153 | 0.773 |
| 55 | F6  | -0.063 | 0.944 | 0.298 | 0.083         | -0.009 | 0.969 | -0.201 | 0.413 |
| 56 | F4  | -0.070 | 0.852 | 0.423 | <b>0.004*</b> | 0.002  | 0.989 | -0.162 | 0.541 |
| 57 | Cz  | -0.007 | 0.962 | 0.318 | 0.056         | 0.079  | 0.917 | -0.044 | 0.945 |

**Supplementary Table S7. Correlation analysis result of delta relative power and LF-HRV.**

|            |      | Group 1. Depressive disorder |         |       |               | Group 2. Anxiety disorder |         |        |         |
|------------|------|------------------------------|---------|-------|---------------|---------------------------|---------|--------|---------|
| Electrodes |      | Resting                      |         | Task  |               | Resting                   |         | Task   |         |
| No.        | Name | r                            | p (FDR) | r     | p (FDR)       | r                         | p (FDR) | r      | p (FDR) |
| 01         | AF4  | -0.070                       | 0.831   | 0.279 | 0.315         | 0.071                     | 0.935   | -0.020 | 0.962   |
| 02         | F2   | -0.062                       | 0.848   | 0.270 | 0.272         | 0.065                     | 0.873   | 0.003  | 0.981   |
| 03         | FCz  | 0.012                        | 0.955   | 0.266 | 0.204         | -0.043                    | 0.820   | 0.109  | 0.966   |
| 04         | Fp2  | -0.098                       | 0.960   | 0.305 | 0.142         | 0.131                     | 0.986   | -0.029 | 0.960   |
| 05         | Fz   | -0.036                       | 0.981   | 0.336 | 0.132         | 0.039                     | 0.968   | 0.071  | 0.984   |
| 06         | FC1  | -0.012                       | 0.982   | 0.265 | 0.209         | -0.062                    | 0.655   | 0.033  | 0.993   |
| 07         | AFz  | -0.142                       | 0.940   | 0.397 | <b>0.032*</b> | 0.059                     | 0.872   | 0.095  | 0.966   |
| 08         | F1   | -0.047                       | 0.865   | 0.311 | 0.206         | 0.094                     | 0.648   | 0.063  | 0.880   |
| 09         | Fp1  | -0.048                       | 0.978   | 0.393 | <b>0.036*</b> | 0.104                     | 0.980   | 0.018  | 0.984   |
| 10         | AF3  | 0.025                        | 0.931   | 0.374 | 0.058         | 0.126                     | 0.858   | 0.033  | 0.891   |
| 11         | F3   | 0.102                        | 0.892   | 0.315 | 0.091         | 0.057                     | 0.909   | -0.041 | 0.961   |
| 12         | F5   | 0.077                        | 0.899   | 0.312 | 0.140         | 0.092                     | 0.875   | 0.017  | 0.906   |
| 13         | FC5  | 0.045                        | 0.875   | 0.251 | 0.269         | 0.034                     | 0.805   | -0.015 | 0.948   |
| 14         | FC3  | 0.031                        | 0.977   | 0.339 | 0.069         | -0.014                    | 0.921   | 0.035  | 0.962   |
| 15         | C1   | 0.078                        | 0.858   | 0.388 | <b>0.021*</b> | -0.070                    | 0.616   | 0.039  | 0.885   |
| 16         | F7   | 0.161                        | 0.551   | 0.344 | 0.091         | -0.006                    | 0.968   | -0.003 | 0.991   |
| 17         | FT7  | 0.064                        | 0.868   | 0.285 | 0.222         | 0.026                     | 0.978   | 0.009  | 0.956   |
| 18         | C3   | 0.087                        | 0.786   | 0.417 | <b>0.009*</b> | -0.016                    | 0.907   | 0.005  | 0.969   |
| 19         | CP1  | 0.073                        | 0.815   | 0.399 | <b>0.025*</b> | -0.008                    | 0.953   | 0.070  | 0.778   |
| 20         | C5   | 0.085                        | 0.732   | 0.394 | <b>0.014*</b> | -0.044                    | 0.816   | 0.039  | 0.921   |
| 21         | T3   | 0.089                        | 0.885   | 0.289 | 0.100         | -0.108                    | 0.708   | 0.072  | 0.935   |
| 22         | TP7  | 0.041                        | 0.792   | 0.413 | <b>0.010*</b> | -0.001                    | 0.994   | 0.037  | 0.925   |
| 23         | CP5  | 0.035                        | 0.904   | 0.422 | <b>0.005*</b> | -0.017                    | 0.904   | 0.012  | 0.932   |
| 24         | P5   | 0.024                        | 0.985   | 0.422 | <b>0.008*</b> | 0.052                     | 0.770   | 0.044  | 0.831   |
| 25         | P3   | 0.029                        | 0.950   | 0.376 | <b>0.026*</b> | 0.042                     | 0.765   | 0.055  | 0.821   |
| 26         | A1   | 0.049                        | 0.957   | 0.365 | 0.073         | -0.074                    | 0.702   | -0.005 | 0.974   |
| 27         | T5   | -0.026                       | 0.920   | 0.342 | 0.056         | 0.060                     | 0.724   | 0.035  | 0.901   |
| 28         | P1   | 0.025                        | 0.999   | 0.298 | 0.168         | -0.012                    | 0.965   | 0.120  | 0.777   |
| 29         | P9   | -0.040                       | 0.911   | 0.376 | <b>0.033*</b> | 0.032                     | 0.885   | 0.042  | 0.901   |

|    |     |        |       |       |               |        |       |        |       |
|----|-----|--------|-------|-------|---------------|--------|-------|--------|-------|
| 30 | PO3 | 0.098  | 0.902 | 0.356 | 0.091         | -0.010 | 0.943 | 0.087  | 0.989 |
| 31 | Pz  | 0.144  | 0.662 | 0.366 | 0.072         | -0.036 | 0.939 | 0.049  | 0.954 |
| 32 | O1  | -0.035 | 0.994 | 0.229 | 0.193         | -0.013 | 0.925 | 0.034  | 0.874 |
| 33 | POz | 0.117  | 0.845 | 0.356 | 0.089         | -0.029 | 0.861 | 0.059  | 0.975 |
| 34 | Oz  | 0.003  | 0.982 | 0.255 | 0.124         | 0.011  | 0.937 | 0.047  | 0.991 |
| 35 | PO4 | 0.083  | 0.945 | 0.329 | 0.070         | -0.002 | 0.990 | 0.077  | 0.935 |
| 36 | O2  | -0.039 | 0.973 | 0.220 | 0.269         | -0.014 | 0.927 | 0.032  | 0.966 |
| 37 | P2  | 0.019  | 0.920 | 0.283 | 0.140         | 0.054  | 0.874 | 0.053  | 0.943 |
| 38 | CP2 | -0.044 | 0.941 | 0.285 | 0.118         | -0.025 | 0.858 | 0.084  | 0.931 |
| 39 | P4  | -0.014 | 0.917 | 0.285 | 0.109         | 0.018  | 0.900 | -0.012 | 0.938 |
| 40 | P10 | -0.022 | 0.870 | 0.327 | 0.085         | -0.079 | 0.929 | -0.001 | 0.997 |
| 41 | T6  | -0.043 | 0.951 | 0.286 | 0.140         | -0.024 | 0.976 | 0.002  | 0.990 |
| 42 | P6  | 0.009  | 0.972 | 0.357 | 0.051         | -0.022 | 0.874 | -0.006 | 0.964 |
| 43 | CP6 | -0.021 | 0.930 | 0.328 | 0.082         | 0.019  | 0.893 | -0.028 | 0.911 |
| 44 | A2  | 0.054  | 0.883 | 0.354 | 0.076         | -0.028 | 0.842 | -0.009 | 0.999 |
| 45 | TP8 | 0.050  | 0.958 | 0.334 | 0.076         | -0.009 | 0.949 | -0.070 | 0.800 |
| 46 | C6  | -0.010 | 0.966 | 0.336 | <b>0.049*</b> | 0.018  | 0.898 | -0.067 | 0.822 |
| 47 | C4  | -0.020 | 0.989 | 0.248 | 0.248         | 0.014  | 0.920 | -0.048 | 0.774 |
| 48 | C2  | -0.032 | 0.973 | 0.327 | 0.091         | -0.004 | 0.980 | 0.056  | 0.918 |
| 49 | T4  | 0.134  | 0.706 | 0.407 | <b>0.020*</b> | 0.028  | 0.839 | -0.020 | 0.966 |
| 50 | FC4 | -0.064 | 0.829 | 0.240 | 0.309         | -0.027 | 0.896 | -0.015 | 0.914 |
| 51 | FC2 | -0.016 | 0.914 | 0.247 | 0.255         | -0.028 | 0.843 | 0.061  | 0.918 |
| 52 | FT8 | 0.052  | 0.872 | 0.287 | 0.155         | 0.062  | 0.983 | -0.096 | 0.797 |
| 53 | FC6 | -0.001 | 0.993 | 0.266 | 0.259         | 0.064  | 0.837 | -0.019 | 0.890 |
| 54 | F8  | 0.179  | 0.515 | 0.328 | 0.062         | 0.027  | 0.964 | -0.119 | 0.637 |
| 55 | F6  | 0.010  | 0.991 | 0.250 | 0.261         | 0.063  | 0.963 | -0.083 | 0.838 |
| 56 | F4  | 0.053  | 0.889 | 0.320 | 0.170         | 0.063  | 0.908 | -0.102 | 0.837 |
| 57 | Cz  | 0.042  | 0.977 | 0.432 | <b>0.011*</b> | -0.040 | 0.840 | 0.095  | 0.777 |

**Supplementary Table S8. Correlation analysis result of theta absolute power and LF-HRV.**

|            |      | Group 1. Depressive disorder |         |        |         | Group 2. Anxiety disorder |         |        |         |
|------------|------|------------------------------|---------|--------|---------|---------------------------|---------|--------|---------|
| Electrodes |      | Resting                      |         | Task   |         | Resting                   |         | Task   |         |
| No.        | Name | r                            | p (FDR) | r      | p (FDR) | r                         | p (FDR) | r      | p (FDR) |
| 01         | AF4  | -0.188                       | 0.546   | 0.233  | 0.155   | 0.145                     | 0.934   | 0.021  | 1.000   |
| 02         | F2   | -0.143                       | 0.632   | 0.199  | 0.221   | 0.056                     | 0.938   | -0.001 | 0.996   |
| 03         | FCz  | 0.037                        | 0.884   | 0.134  | 0.382   | 0.133                     | 0.922   | 0.063  | 0.916   |
| 04         | Fp2  | -0.139                       | 0.570   | 0.199  | 0.231   | 0.212                     | 0.866   | -0.037 | 0.856   |
| 05         | Fz   | -0.108                       | 0.698   | 0.137  | 0.369   | 0.141                     | 0.831   | -0.062 | 0.803   |
| 06         | FC1  | -0.153                       | 0.686   | 0.063  | 0.927   | 0.206                     | 0.706   | 0.133  | 0.823   |
| 07         | AFz  | -0.156                       | 0.406   | 0.267  | 0.092   | 0.151                     | 0.969   | 0.027  | 0.916   |
| 08         | F1   | -0.081                       | 0.824   | 0.097  | 0.516   | 0.153                     | 0.884   | 0.061  | 0.863   |
| 09         | Fp1  | -0.070                       | 0.787   | 0.140  | 0.355   | 0.174                     | 0.976   | -0.045 | 0.839   |
| 10         | AF3  | -0.139                       | 0.701   | 0.200  | 0.259   | 0.158                     | 0.824   | 0.067  | 0.987   |
| 11         | F3   | -0.077                       | 0.770   | 0.098  | 0.510   | 0.170                     | 0.694   | -0.042 | 0.965   |
| 12         | F5   | -0.130                       | 0.738   | 0.127  | 0.458   | 0.193                     | 0.742   | 0.088  | 0.951   |
| 13         | FC5  | -0.084                       | 0.765   | 0.161  | 0.320   | 0.153                     | 0.808   | 0.082  | 0.921   |
| 14         | FC3  | -0.146                       | 0.689   | 0.111  | 0.477   | 0.158                     | 0.913   | 0.147  | 0.879   |
| 15         | C1   | -0.142                       | 0.676   | 0.080  | 0.688   | 0.132                     | 0.848   | 0.089  | 0.840   |
| 16         | F7   | 0.051                        | 0.925   | 0.031  | 0.820   | 0.237                     | 0.645   | -0.055 | 0.910   |
| 17         | FT7  | -0.038                       | 0.987   | 0.174  | 0.325   | 0.151                     | 0.776   | 0.067  | 0.976   |
| 18         | C3   | -0.127                       | 0.874   | 0.093  | 0.645   | 0.156                     | 0.945   | 0.062  | 0.922   |
| 19         | CP1  | -0.118                       | 0.748   | 0.052  | 0.814   | 0.177                     | 0.802   | 0.090  | 0.873   |
| 20         | C5   | -0.020                       | 0.918   | 0.166  | 0.332   | 0.164                     | 0.902   | 0.113  | 0.877   |
| 21         | T3   | 0.093                        | 0.588   | -0.050 | 0.847   | 0.254                     | 0.599   | -0.018 | 0.976   |
| 22         | TP7  | -0.024                       | 0.927   | 0.119  | 0.553   | 0.188                     | 0.855   | 0.101  | 0.943   |
| 23         | CP5  | -0.032                       | 0.994   | 0.153  | 0.375   | 0.200                     | 0.785   | 0.148  | 0.850   |
| 24         | P5   | -0.029                       | 0.971   | 0.175  | 0.364   | 0.252                     | 0.682   | 0.189  | 0.839   |
| 25         | P3   | -0.040                       | 0.984   | 0.151  | 0.434   | 0.223                     | 0.822   | 0.172  | 0.912   |
| 26         | A1   | 0.016                        | 0.906   | 0.095  | 0.678   | 0.228                     | 0.645   | 0.138  | 0.865   |
| 27         | T5   | -0.056                       | 0.890   | 0.045  | 0.805   | 0.220                     | 0.726   | 0.138  | 0.919   |
| 28         | P1   | -0.029                       | 0.914   | 0.121  | 0.541   | 0.181                     | 0.913   | 0.085  | 0.784   |
| 29         | P9   | 0.007                        | 0.958   | 0.097  | 0.519   | 0.258                     | 0.541   | 0.192  | 0.770   |

|    |     |        |       |       |       |       |       |        |       |
|----|-----|--------|-------|-------|-------|-------|-------|--------|-------|
| 30 | PO3 | -0.138 | 0.404 | 0.097 | 0.563 | 0.223 | 0.567 | 0.057  | 0.902 |
| 31 | Pz  | -0.177 | 0.499 | 0.020 | 0.952 | 0.246 | 0.625 | -0.030 | 0.981 |
| 32 | O1  | -0.037 | 0.788 | 0.070 | 0.692 | 0.263 | 0.358 | 0.226  | 0.924 |
| 33 | POz | -0.175 | 0.507 | 0.052 | 0.760 | 0.245 | 0.495 | 0.061  | 0.957 |
| 34 | Oz  | -0.073 | 0.914 | 0.000 | 1.000 | 0.269 | 0.321 | 0.177  | 0.998 |
| 35 | PO4 | -0.072 | 0.928 | 0.086 | 0.747 | 0.245 | 0.481 | 0.042  | 0.927 |
| 36 | O2  | -0.044 | 0.951 | 0.046 | 0.800 | 0.288 | 0.226 | 0.202  | 0.772 |
| 37 | P2  | -0.046 | 0.988 | 0.122 | 0.542 | 0.175 | 0.661 | 0.110  | 0.883 |
| 38 | CP2 | 0.010  | 0.943 | 0.165 | 0.418 | 0.164 | 0.764 | 0.063  | 0.977 |
| 39 | P4  | -0.070 | 0.781 | 0.132 | 0.430 | 0.213 | 0.787 | 0.133  | 0.854 |
| 40 | P10 | -0.122 | 0.835 | 0.016 | 0.904 | 0.290 | 0.433 | 0.195  | 0.774 |
| 41 | T6  | -0.044 | 0.746 | 0.093 | 0.535 | 0.260 | 0.546 | 0.203  | 0.697 |
| 42 | P6  | -0.059 | 0.887 | 0.091 | 0.548 | 0.262 | 0.592 | 0.211  | 0.739 |
| 43 | CP6 | -0.013 | 0.945 | 0.144 | 0.419 | 0.237 | 0.681 | 0.161  | 0.996 |
| 44 | A2  | -0.073 | 0.905 | 0.038 | 0.807 | 0.255 | 0.566 | 0.193  | 0.594 |
| 45 | TP8 | 0.018  | 0.969 | 0.104 | 0.582 | 0.169 | 0.844 | 0.128  | 0.900 |
| 46 | C6  | 0.035  | 0.990 | 0.151 | 0.385 | 0.162 | 0.825 | 0.095  | 0.998 |
| 47 | C4  | 0.001  | 0.991 | 0.142 | 0.508 | 0.175 | 0.736 | 0.094  | 0.934 |
| 48 | C2  | -0.073 | 0.952 | 0.056 | 0.960 | 0.114 | 0.874 | 0.068  | 0.928 |
| 49 | T4  | 0.088  | 0.655 | 0.043 | 0.817 | 0.259 | 0.431 | -0.032 | 0.999 |
| 50 | FC4 | 0.043  | 0.891 | 0.188 | 0.358 | 0.128 | 0.771 | 0.073  | 0.948 |
| 51 | FC2 | -0.039 | 0.994 | 0.046 | 0.962 | 0.102 | 0.891 | 0.044  | 0.834 |
| 52 | FT8 | 0.030  | 0.961 | 0.102 | 0.654 | 0.106 | 0.912 | 0.051  | 0.986 |
| 53 | FC6 | 0.050  | 0.881 | 0.203 | 0.249 | 0.128 | 0.845 | 0.055  | 0.972 |
| 54 | F8  | 0.082  | 0.710 | 0.072 | 0.648 | 0.191 | 0.831 | -0.046 | 0.922 |
| 55 | F6  | -0.044 | 0.997 | 0.132 | 0.450 | 0.130 | 0.911 | 0.071  | 0.927 |
| 56 | F4  | -0.074 | 0.861 | 0.175 | 0.258 | 0.132 | 0.990 | -0.057 | 0.886 |
| 57 | Cz  | 0.003  | 0.980 | 0.071 | 0.655 | 0.200 | 0.720 | -0.011 | 0.939 |

---



**Supplementary Table S9. Correlation analysis result of theta relative power and LF-HRV.**

|            |      | Group 1. Depressive disorder |         |        |         | Group 2. Anxiety disorder |         |       |               |
|------------|------|------------------------------|---------|--------|---------|---------------------------|---------|-------|---------------|
| Electrodes |      | Resting                      |         | Task   |         | Resting                   |         | Task  |               |
| No.        | Name | r                            | p (FDR) | r      | p (FDR) | r                         | p (FDR) | r     | p (FDR)       |
| 01         | AF4  | 0.050                        | 0.975   | -0.054 | 0.923   | 0.224                     | 0.367   | 0.376 | <b>0.049*</b> |
| 02         | F2   | 0.015                        | 0.941   | -0.059 | 0.868   | 0.208                     | 0.453   | 0.339 | 0.069         |
| 03         | FCz  | 0.046                        | 0.977   | 0.003  | 0.989   | 0.198                     | 0.652   | 0.200 | 0.529         |
| 04         | Fp2  | 0.000                        | 1.000   | -0.070 | 0.811   | 0.286                     | 0.389   | 0.389 | <b>0.024*</b> |
| 05         | Fz   | 0.001                        | 0.992   | -0.147 | 0.406   | 0.292                     | 0.362   | 0.326 | 0.073         |
| 06         | FC1  | 0.038                        | 0.993   | -0.008 | 0.954   | 0.146                     | 0.726   | 0.193 | 0.432         |
| 07         | AFz  | 0.125                        | 0.956   | -0.127 | 0.648   | 0.228                     | 0.610   | 0.285 | 0.201         |
| 08         | F1   | 0.004                        | 0.998   | -0.087 | 0.970   | 0.169                     | 0.680   | 0.310 | 0.170         |
| 09         | Fp1  | -0.136                       | 0.875   | -0.088 | 0.843   | 0.229                     | 0.627   | 0.363 | 0.050         |
| 10         | AF3  | -0.069                       | 0.983   | -0.076 | 0.923   | 0.188                     | 0.626   | 0.361 | 0.061         |
| 11         | F3   | -0.122                       | 0.773   | -0.233 | 0.365   | 0.25                      | 0.220   | 0.382 | <b>0.045*</b> |
| 12         | F5   | -0.087                       | 0.964   | -0.152 | 0.854   | 0.157                     | 0.828   | 0.340 | 0.085         |
| 13         | FC5  | -0.014                       | 0.943   | -0.104 | 0.869   | 0.145                     | 0.771   | 0.303 | 0.160         |
| 14         | FC3  | 0.051                        | 0.987   | -0.073 | 0.951   | 0.155                     | 0.854   | 0.267 | 0.352         |
| 15         | C1   | 0.141                        | 0.804   | -0.016 | 0.980   | 0.077                     | 0.877   | 0.192 | 0.462         |
| 16         | F7   | -0.005                       | 0.970   | -0.262 | 0.219   | 0.243                     | 0.342   | 0.379 | 0.062         |
| 17         | FT7  | 0.065                        | 0.955   | -0.104 | 0.842   | 0.144                     | 0.826   | 0.300 | 0.164         |
| 18         | C3   | 0.149                        | 0.790   | 0.023  | 0.999   | 0.151                     | 0.815   | 0.254 | 0.278         |
| 19         | CP1  | 0.175                        | 0.740   | 0.041  | 0.972   | 0.091                     | 0.869   | 0.149 | 0.666         |
| 20         | C5   | 0.124                        | 0.696   | 0.008  | 0.984   | 0.155                     | 0.808   | 0.222 | 0.461         |
| 21         | T3   | 0.092                        | 0.780   | -0.144 | 0.694   | 0.306                     | 0.154   | 0.445 | <b>0.010*</b> |
| 22         | TP7  | 0.110                        | 0.891   | -0.029 | 0.913   | 0.169                     | 0.729   | 0.254 | 0.275         |
| 23         | CP5  | 0.140                        | 0.745   | 0.029  | 0.991   | 0.176                     | 0.808   | 0.247 | 0.328         |
| 24         | P5   | 0.066                        | 0.946   | 0.012  | 0.996   | 0.198                     | 0.627   | 0.267 | 0.510         |
| 25         | P3   | 0.091                        | 0.955   | 0.024  | 0.998   | 0.182                     | 0.854   | 0.277 | 0.399         |
| 26         | A1   | 0.089                        | 0.703   | -0.016 | 0.910   | 0.213                     | 0.751   | 0.298 | 0.370         |
| 27         | T5   | 0.056                        | 0.986   | -0.009 | 0.948   | 0.196                     | 0.732   | 0.290 | 0.437         |
| 28         | P1   | 0.058                        | 0.989   | 0.036  | 0.974   | 0.216                     | 0.718   | 0.290 | 0.437         |
| 29         | P9   | 0.057                        | 0.934   | 0.013  | 0.967   | 0.193                     | 0.804   | 0.280 | 0.522         |

|    |     |        |       |        |       |       |       |       |               |
|----|-----|--------|-------|--------|-------|-------|-------|-------|---------------|
| 30 | PO3 | 0.013  | 0.973 | -0.018 | 0.991 | 0.211 | 0.764 | 0.248 | 0.630         |
| 31 | Pz  | -0.038 | 0.986 | -0.040 | 0.896 | 0.205 | 0.656 | 0.265 | 0.422         |
| 32 | O1  | -0.031 | 0.893 | 0.026  | 0.997 | 0.212 | 0.811 | 0.290 | 0.437         |
| 33 | POz | -0.011 | 0.993 | -0.022 | 0.952 | 0.213 | 0.657 | 0.267 | 0.614         |
| 34 | Oz  | -0.025 | 0.858 | -0.015 | 0.914 | 0.22  | 0.725 | 0.302 | 0.346         |
| 35 | PO4 | -0.072 | 0.797 | -0.033 | 0.917 | 0.187 | 0.832 | 0.227 | 0.885         |
| 36 | O2  | -0.068 | 0.741 | -0.110 | 0.928 | 0.223 | 0.753 | 0.330 | 0.192         |
| 37 | P2  | -0.098 | 0.874 | -0.086 | 0.838 | 0.179 | 0.866 | 0.295 | 0.394         |
| 38 | CP2 | 0.003  | 0.983 | -0.078 | 0.987 | 0.114 | 0.768 | 0.210 | 0.502         |
| 39 | P4  | -0.010 | 0.952 | -0.095 | 0.910 | 0.211 | 0.564 | 0.352 | 0.074         |
| 40 | P10 | -0.031 | 0.978 | -0.076 | 0.931 | 0.258 | 0.603 | 0.333 | 0.182         |
| 41 | T6  | -0.069 | 0.950 | -0.175 | 0.854 | 0.211 | 0.649 | 0.329 | 0.195         |
| 42 | P6  | -0.008 | 0.955 | -0.138 | 0.895 | 0.212 | 0.469 | 0.355 | 0.073         |
| 43 | CP6 | 0.059  | 0.777 | -0.106 | 0.947 | 0.196 | 0.557 | 0.356 | 0.053         |
| 44 | A2  | 0.008  | 0.989 | -0.069 | 0.962 | 0.185 | 0.722 | 0.305 | 0.293         |
| 45 | TP8 | 0.060  | 0.923 | -0.126 | 0.984 | 0.153 | 0.716 | 0.335 | 0.057         |
| 46 | C6  | 0.080  | 0.933 | -0.120 | 0.993 | 0.145 | 0.688 | 0.311 | 0.097         |
| 47 | C4  | 0.076  | 0.927 | -0.057 | 0.998 | 0.148 | 0.739 | 0.267 | 0.262         |
| 48 | C2  | 0.079  | 0.930 | -0.117 | 0.988 | 0.144 | 0.647 | 0.268 | 0.264         |
| 49 | T4  | 0.090  | 0.872 | -0.117 | 0.693 | 0.297 | 0.379 | 0.366 | 0.085         |
| 50 | FC4 | 0.017  | 0.998 | -0.088 | 0.994 | 0.18  | 0.501 | 0.335 | 0.126         |
| 51 | FC2 | 0.033  | 0.996 | -0.064 | 0.919 | 0.196 | 0.413 | 0.248 | 0.263         |
| 52 | FT8 | 0.054  | 0.964 | -0.152 | 0.856 | 0.16  | 0.538 | 0.414 | <b>0.012*</b> |
| 53 | FC6 | 0.013  | 0.941 | -0.087 | 0.896 | 0.195 | 0.412 | 0.393 | <b>0.024*</b> |
| 54 | F8  | 0.156  | 0.759 | -0.164 | 0.494 | 0.269 | 0.351 | 0.421 | <b>0.020*</b> |
| 55 | F6  | 0.042  | 0.990 | -0.117 | 0.778 | 0.204 | 0.417 | 0.425 | <b>0.018*</b> |
| 56 | F4  | 0.017  | 0.986 | -0.189 | 0.526 | 0.28  | 0.217 | 0.432 | <b>0.007*</b> |
| 57 | Cz  | 0.109  | 0.975 | -0.025 | 0.941 | 0.204 | 0.515 | 0.283 | 0.384         |

**Supplementary Table S10. Correlation analysis result of alpha absolute power and LF-HRV.**

|            |      | Group 1. Depressive disorder |         |        |         | Group 2. Anxiety disorder |         |        |         |
|------------|------|------------------------------|---------|--------|---------|---------------------------|---------|--------|---------|
| Electrodes |      | Resting                      |         | Task   |         | Resting                   |         | Task   |         |
| No.        | Name | r                            | p (FDR) | r      | p (FDR) | r                         | p (FDR) | r      | p (FDR) |
| 01         | AF4  | -0.104                       | 0.727   | 0.096  | 0.557   | -0.064                    | 0.933   | -0.281 | 0.304   |
| 02         | F2   | -0.043                       | 0.813   | 0.097  | 0.528   | -0.115                    | 0.800   | -0.271 | 0.320   |
| 03         | FCz  | 0.030                        | 0.904   | 0.083  | 0.543   | -0.003                    | 0.981   | -0.118 | 0.907   |
| 04         | Fp2  | -0.038                       | 0.779   | 0.084  | 0.584   | -0.071                    | 0.831   | -0.209 | 0.534   |
| 05         | Fz   | -0.028                       | 0.936   | 0.071  | 0.656   | -0.108                    | 0.969   | -0.215 | 0.405   |
| 06         | FC1  | -0.118                       | 0.717   | 0.010  | 0.940   | 0.115                     | 0.761   | -0.023 | 0.955   |
| 07         | AFz  | -0.052                       | 0.775   | 0.091  | 0.549   | -0.081                    | 0.934   | -0.271 | 0.307   |
| 08         | F1   | -0.003                       | 0.986   | 0.020  | 0.883   | -0.038                    | 0.941   | -0.255 | 0.600   |
| 09         | Fp1  | 0.031                        | 0.892   | 0.001  | 0.995   | -0.062                    | 0.909   | -0.223 | 0.360   |
| 10         | AF3  | -0.040                       | 0.912   | 0.025  | 0.855   | -0.038                    | 0.954   | -0.291 | 0.213   |
| 11         | F3   | -0.006                       | 0.967   | 0.067  | 0.624   | 0.036                     | 0.951   | -0.167 | 0.589   |
| 12         | F5   | -0.041                       | 0.843   | 0.048  | 0.727   | 0.043                     | 0.973   | -0.213 | 0.791   |
| 13         | FC5  | -0.006                       | 0.966   | 0.110  | 0.456   | 0.075                     | 0.863   | -0.143 | 0.969   |
| 14         | FC3  | -0.069                       | 0.804   | 0.071  | 0.652   | 0.091                     | 0.831   | -0.063 | 0.942   |
| 15         | C1   | -0.164                       | 0.428   | -0.021 | 0.875   | 0.126                     | 0.523   | -0.014 | 0.985   |
| 16         | F7   | -0.004                       | 0.976   | 0.011  | 0.935   | 0.120                     | 0.888   | -0.160 | 0.800   |
| 17         | FT7  | -0.015                       | 0.913   | 0.095  | 0.528   | 0.071                     | 0.878   | -0.150 | 0.921   |
| 18         | C3   | -0.145                       | 0.761   | -0.034 | 0.801   | 0.095                     | 0.786   | -0.070 | 0.922   |
| 19         | CP1  | -0.186                       | 0.646   | -0.094 | 0.795   | 0.152                     | 0.559   | 0.017  | 0.959   |
| 20         | C5   | 0.006                        | 0.968   | 0.107  | 0.513   | 0.120                     | 0.839   | -0.025 | 0.868   |
| 21         | T3   | 0.008                        | 0.986   | -0.071 | 0.870   | 0.158                     | 0.431   | -0.114 | 0.975   |
| 22         | TP7  | 0.009                        | 0.947   | 0.077  | 0.619   | 0.113                     | 0.721   | -0.046 | 0.929   |
| 23         | CP5  | -0.006                       | 0.968   | 0.093  | 0.568   | 0.155                     | 0.694   | 0.008  | 0.985   |
| 24         | P5   | 0.001                        | 0.994   | 0.083  | 0.611   | 0.152                     | 0.629   | 0.004  | 0.989   |
| 25         | P3   | -0.008                       | 0.952   | 0.085  | 0.629   | 0.108                     | 0.883   | -0.054 | 0.955   |
| 26         | A1   | -0.015                       | 0.921   | 0.020  | 0.954   | 0.149                     | 0.457   | -0.016 | 0.950   |
| 27         | T5   | -0.003                       | 0.983   | 0.027  | 0.841   | 0.092                     | 0.661   | -0.044 | 0.964   |
| 28         | P1   | -0.027                       | 0.843   | 0.003  | 0.981   | -0.015                    | 0.921   | -0.127 | 0.878   |
| 29         | P9   | 0.028                        | 0.839   | 0.048  | 0.783   | 0.131                     | 0.477   | 0.002  | 0.989   |

|    |     |        |       |        |       |        |       |        |       |
|----|-----|--------|-------|--------|-------|--------|-------|--------|-------|
| 30 | PO3 | -0.060 | 0.779 | 0.003  | 0.983 | 0.047  | 0.991 | -0.077 | 0.890 |
| 31 | Pz  | -0.102 | 0.845 | -0.050 | 0.844 | 0.105  | 0.977 | -0.063 | 0.953 |
| 32 | O1  | 0.027  | 0.972 | 0.037  | 0.853 | 0.068  | 0.851 | -0.028 | 0.939 |
| 33 | POz | -0.112 | 0.665 | -0.040 | 0.835 | 0.066  | 0.969 | -0.120 | 0.894 |
| 34 | Oz  | -0.020 | 0.885 | -0.009 | 0.970 | 0.068  | 0.930 | -0.108 | 0.814 |
| 35 | PO4 | -0.001 | 0.996 | 0.008  | 0.952 | 0.065  | 0.943 | -0.077 | 0.957 |
| 36 | O2  | 0.030  | 0.892 | 0.038  | 0.854 | 0.076  | 0.977 | -0.124 | 0.897 |
| 37 | P2  | 0.053  | 0.823 | 0.100  | 0.502 | 0.008  | 0.975 | -0.130 | 0.676 |
| 38 | CP2 | 0.102  | 0.593 | 0.162  | 0.435 | 0.145  | 0.418 | -0.050 | 0.964 |
| 39 | P4  | 0.029  | 0.834 | 0.116  | 0.428 | 0.098  | 0.963 | -0.094 | 0.736 |
| 40 | P10 | -0.080 | 0.907 | -0.022 | 0.873 | 0.157  | 0.670 | -0.041 | 0.998 |
| 41 | T6  | 0.034  | 0.870 | 0.122  | 0.484 | 0.142  | 0.422 | -0.060 | 0.917 |
| 42 | P6  | -0.022 | 0.962 | 0.051  | 0.708 | 0.190  | 0.615 | 0.006  | 0.994 |
| 43 | CP6 | 0.026  | 0.991 | 0.114  | 0.470 | 0.179  | 0.798 | 0.024  | 0.934 |
| 44 | A2  | -0.137 | 0.733 | -0.090 | 0.844 | 0.183  | 0.480 | 0.039  | 0.878 |
| 45 | TP8 | -0.013 | 0.952 | 0.044  | 0.747 | 0.162  | 0.796 | 0.028  | 0.912 |
| 46 | C6  | 0.049  | 0.840 | 0.104  | 0.482 | 0.151  | 0.785 | 0.002  | 0.989 |
| 47 | C4  | 0.029  | 0.967 | 0.094  | 0.578 | 0.133  | 0.786 | -0.020 | 0.986 |
| 48 | C2  | -0.051 | 0.846 | 0.032  | 0.881 | 0.040  | 0.848 | -0.094 | 0.839 |
| 49 | T4  | -0.019 | 0.888 | -0.016 | 0.979 | 0.163  | 0.574 | -0.144 | 0.928 |
| 50 | FC4 | 0.115  | 0.519 | 0.136  | 0.359 | 0.037  | 0.924 | -0.129 | 0.832 |
| 51 | FC2 | -0.025 | 0.923 | -0.004 | 0.979 | -0.006 | 0.986 | -0.115 | 0.988 |
| 52 | FT8 | 0.034  | 0.805 | 0.025  | 0.926 | -0.009 | 0.986 | -0.151 | 0.970 |
| 53 | FC6 | 0.095  | 0.575 | 0.105  | 0.521 | -0.004 | 0.974 | -0.190 | 0.793 |
| 54 | F8  | -0.016 | 0.907 | 0.011  | 0.938 | 0.045  | 0.926 | -0.144 | 0.854 |
| 55 | F6  | 0.009  | 0.948 | 0.046  | 0.797 | -0.043 | 0.947 | -0.225 | 0.742 |
| 56 | F4  | -0.055 | 0.963 | 0.083  | 0.586 | -0.048 | 0.894 | -0.185 | 0.607 |
| 57 | Cz  | -0.030 | 0.896 | 0.006  | 0.967 | 0.102  | 0.567 | -0.069 | 0.891 |

---

**Supplementary Table S11. Correlation analysis result of alpha relative power and LF-HRV.**

|            |      | Group 1. Depressive disorder |         |        |         | Group 2. Anxiety disorder |         |        |         |
|------------|------|------------------------------|---------|--------|---------|---------------------------|---------|--------|---------|
| Electrodes |      | Resting                      |         | Task   |         | Resting                   |         | Task   |         |
| No.        | Name | r                            | p (FDR) | r      | p (FDR) | r                         | p (FDR) | r      | p (FDR) |
| 01         | AF4  | 0.140                        | 0.491   | -0.093 | 0.805   | -0.094                    | 0.943   | -0.180 | 0.845   |
| 02         | F2   | 0.143                        | 0.396   | -0.053 | 0.906   | -0.082                    | 0.881   | -0.187 | 0.915   |
| 03         | FCz  | 0.050                        | 0.931   | -0.050 | 0.848   | -0.056                    | 0.860   | -0.175 | 0.968   |
| 04         | Fp2  | 0.136                        | 0.506   | -0.116 | 0.925   | -0.174                    | 0.844   | -0.204 | 0.974   |
| 05         | Fz   | 0.119                        | 0.619   | -0.094 | 0.994   | -0.116                    | 0.946   | -0.193 | 0.866   |
| 06         | FC1  | 0.077                        | 0.671   | -0.059 | 0.917   | -0.006                    | 0.965   | -0.143 | 0.970   |
| 07         | AFz  | 0.172                        | 0.443   | -0.155 | 0.685   | -0.100                    | 0.954   | -0.232 | 0.787   |
| 08         | F1   | 0.142                        | 0.516   | -0.079 | 0.942   | -0.118                    | 0.868   | -0.231 | 0.817   |
| 09         | Fp1  | 0.154                        | 0.624   | -0.157 | 0.833   | -0.127                    | 0.924   | -0.223 | 0.585   |
| 10         | AF3  | 0.084                        | 0.697   | -0.152 | 0.571   | -0.118                    | 0.899   | -0.222 | 0.808   |
| 11         | F3   | 0.069                        | 0.727   | -0.055 | 0.925   | -0.071                    | 0.913   | -0.143 | 0.933   |
| 12         | F5   | 0.077                        | 0.675   | -0.087 | 0.747   | -0.098                    | 0.727   | -0.212 | 0.711   |
| 13         | FC5  | 0.104                        | 0.525   | -0.026 | 0.936   | -0.032                    | 0.817   | -0.164 | 0.743   |
| 14         | FC3  | 0.120                        | 0.446   | -0.080 | 0.774   | -0.005                    | 0.973   | -0.203 | 0.603   |
| 15         | C1   | -0.017                       | 0.902   | -0.176 | 0.361   | 0.048                     | 0.733   | -0.172 | 0.833   |
| 16         | F7   | -0.010                       | 0.943   | -0.070 | 0.833   | -0.039                    | 0.778   | -0.142 | 0.796   |
| 17         | FT7  | 0.097                        | 0.564   | -0.061 | 0.853   | -0.024                    | 0.863   | -0.182 | 0.821   |
| 18         | C3   | 0.034                        | 0.806   | -0.167 | 0.473   | -0.010                    | 0.945   | -0.171 | 0.933   |
| 19         | CP1  | -0.023                       | 0.867   | -0.212 | 0.369   | 0.016                     | 0.997   | -0.126 | 0.975   |
| 20         | C5   | 0.148                        | 0.518   | -0.110 | 0.612   | 0.031                     | 0.822   | -0.179 | 0.773   |
| 21         | T3   | 0.023                        | 0.979   | -0.067 | 0.804   | 0.003                     | 0.982   | -0.144 | 0.940   |
| 22         | TP7  | 0.172                        | 0.423   | -0.101 | 0.732   | -0.006                    | 0.965   | -0.169 | 0.999   |
| 23         | CP5  | 0.163                        | 0.418   | -0.109 | 0.774   | 0.014                     | 0.918   | -0.136 | 0.931   |
| 24         | P5   | 0.143                        | 0.534   | -0.085 | 0.837   | -0.047                    | 0.867   | -0.150 | 0.886   |
| 25         | P3   | 0.117                        | 0.507   | -0.068 | 0.862   | -0.070                    | 0.930   | -0.207 | 0.985   |
| 26         | A1   | 0.098                        | 0.850   | -0.078 | 0.865   | 0.047                     | 0.798   | -0.098 | 0.892   |
| 27         | T5   | 0.148                        | 0.669   | -0.016 | 0.977   | -0.037                    | 0.788   | -0.146 | 0.947   |
| 28         | P1   | 0.088                        | 0.613   | -0.050 | 0.898   | -0.069                    | 0.879   | -0.232 | 0.802   |
| 29         | P9   | 0.163                        | 0.656   | -0.041 | 0.905   | -0.032                    | 0.888   | -0.178 | 0.865   |

|    |     |        |       |        |       |        |       |        |       |
|----|-----|--------|-------|--------|-------|--------|-------|--------|-------|
| 30 | PO3 | 0.049  | 0.908 | -0.077 | 0.930 | -0.050 | 0.804 | -0.173 | 0.840 |
| 31 | Pz  | 0.038  | 0.779 | -0.096 | 0.893 | -0.013 | 0.925 | -0.136 | 0.849 |
| 32 | O1  | 0.166  | 0.412 | 0.069  | 0.725 | -0.048 | 0.792 | -0.186 | 0.835 |
| 33 | POz | 0.025  | 0.856 | -0.073 | 0.831 | -0.021 | 0.879 | -0.165 | 0.899 |
| 34 | Oz  | 0.105  | 0.574 | 0.036  | 0.793 | -0.051 | 0.774 | -0.193 | 0.773 |
| 35 | PO4 | 0.076  | 0.627 | -0.046 | 0.898 | -0.024 | 0.861 | -0.162 | 0.799 |
| 36 | O2  | 0.158  | 0.527 | 0.078  | 0.671 | -0.058 | 0.725 | -0.205 | 0.874 |
| 37 | P2  | 0.153  | 0.460 | 0.013  | 0.925 | -0.079 | 0.833 | -0.209 | 0.708 |
| 38 | CP2 | 0.192  | 0.406 | 0.010  | 0.993 | 0.015  | 0.914 | -0.186 | 0.696 |
| 39 | P4  | 0.171  | 0.426 | -0.010 | 0.942 | -0.045 | 0.851 | -0.196 | 0.775 |
| 40 | P10 | 0.080  | 0.942 | -0.080 | 0.895 | 0.034  | 0.874 | -0.142 | 0.916 |
| 41 | T6  | 0.141  | 0.650 | -0.003 | 0.980 | 0.029  | 0.891 | -0.150 | 0.870 |
| 42 | P6  | 0.101  | 0.778 | -0.096 | 0.863 | 0.018  | 0.898 | -0.176 | 0.722 |
| 43 | CP6 | 0.129  | 0.629 | -0.078 | 0.812 | -0.017 | 0.903 | -0.141 | 0.830 |
| 44 | A2  | -0.032 | 0.943 | -0.185 | 0.372 | 0.064  | 0.701 | -0.084 | 0.789 |
| 45 | TP8 | 0.033  | 0.864 | -0.146 | 0.497 | 0.058  | 0.799 | -0.081 | 0.974 |
| 46 | C6  | 0.110  | 0.725 | -0.135 | 0.523 | 0.044  | 0.753 | -0.040 | 0.937 |
| 47 | C4  | 0.131  | 0.620 | -0.075 | 0.900 | 0.015  | 0.915 | -0.100 | 0.922 |
| 48 | C2  | 0.092  | 0.724 | -0.084 | 0.919 | -0.010 | 0.943 | -0.186 | 0.842 |
| 49 | T4  | -0.062 | 0.928 | -0.155 | 0.473 | -0.010 | 0.944 | -0.131 | 0.680 |
| 50 | FC4 | 0.172  | 0.332 | -0.053 | 0.904 | 0.007  | 0.959 | -0.154 | 0.814 |
| 51 | FC2 | 0.050  | 0.773 | -0.063 | 0.882 | -0.019 | 0.891 | -0.142 | 0.865 |
| 52 | FT8 | 0.079  | 0.665 | -0.109 | 0.702 | -0.064 | 0.996 | -0.124 | 0.889 |
| 53 | FC6 | 0.122  | 0.479 | -0.069 | 0.801 | -0.069 | 0.977 | -0.180 | 0.728 |
| 54 | F8  | -0.056 | 0.931 | -0.127 | 0.725 | -0.042 | 0.944 | -0.096 | 0.937 |
| 55 | F6  | 0.095  | 0.527 | -0.076 | 0.798 | -0.076 | 0.950 | -0.140 | 0.879 |
| 56 | F4  | 0.027  | 0.842 | -0.091 | 0.912 | -0.086 | 0.932 | -0.096 | 0.933 |
| 57 | Cz  | -0.019 | 0.966 | -0.155 | 0.470 | -0.033 | 0.882 | -0.143 | 0.783 |

---

**Supplementary Table S12. Correlation analysis result of beta absolute power and LF-HRV.**

|            |      | Group 1. Depressive disorder |         |        |         | Group 2. Anxiety disorder |         |        |         |
|------------|------|------------------------------|---------|--------|---------|---------------------------|---------|--------|---------|
| Electrodes |      | Resting                      |         | Task   |         | Resting                   |         | Task   |         |
| No.        | Name | r                            | p (FDR) | r      | p (FDR) | r                         | p (FDR) | r      | p (FDR) |
| 01         | AF4  | -0.249                       | 0.541   | 0.081  | 0.654   | 0.002                     | 0.988   | -0.258 | 0.406   |
| 02         | F2   | -0.219                       | 0.550   | 0.093  | 0.619   | -0.078                    | 0.713   | -0.215 | 0.607   |
| 03         | FCz  | -0.014                       | 0.917   | 0.072  | 0.646   | 0.117                     | 0.645   | -0.008 | 0.979   |
| 04         | Fp2  | -0.167                       | 0.786   | 0.084  | 0.699   | -0.062                    | 0.774   | -0.108 | 0.776   |
| 05         | Fz   | -0.180                       | 0.746   | 0.036  | 0.794   | -0.159                    | 0.547   | -0.171 | 0.562   |
| 06         | FC1  | -0.203                       | 0.756   | 0.028  | 0.929   | 0.203                     | 0.485   | 0.069  | 0.863   |
| 07         | AFz  | -0.230                       | 0.466   | 0.072  | 0.676   | -0.036                    | 0.928   | -0.231 | 0.401   |
| 08         | F1   | -0.151                       | 0.934   | -0.029 | 0.848   | 0.042                     | 0.924   | -0.192 | 0.814   |
| 09         | Fp1  | -0.056                       | 0.894   | -0.006 | 0.966   | -0.050                    | 0.864   | -0.132 | 0.736   |
| 10         | AF3  | -0.164                       | 0.933   | -0.018 | 0.894   | -0.012                    | 0.979   | -0.267 | 0.319   |
| 11         | F3   | -0.137                       | 0.931   | 0.021  | 0.953   | -0.042                    | 0.905   | -0.122 | 0.853   |
| 12         | F5   | -0.222                       | 0.833   | 0.011  | 0.938   | 0.089                     | 0.916   | -0.174 | 0.804   |
| 13         | FC5  | -0.221                       | 0.733   | 0.067  | 0.675   | 0.083                     | 0.818   | -0.114 | 0.842   |
| 14         | FC3  | -0.265                       | 0.607   | 0.014  | 0.916   | 0.116                     | 0.778   | 0.005  | 0.969   |
| 15         | C1   | -0.249                       | 0.612   | -0.018 | 0.969   | 0.111                     | 0.614   | 0.033  | 0.969   |
| 16         | F7   | -0.062                       | 0.904   | -0.045 | 0.895   | 0.064                     | 0.841   | -0.144 | 0.828   |
| 17         | FT7  | -0.248                       | 0.754   | 0.035  | 0.894   | 0.067                     | 0.820   | -0.115 | 0.809   |
| 18         | C3   | -0.307                       | 0.279   | -0.075 | 0.950   | 0.135                     | 0.860   | -0.017 | 0.998   |
| 19         | CP1  | -0.264                       | 0.517   | -0.065 | 0.991   | 0.158                     | 0.620   | 0.053  | 0.939   |
| 20         | C5   | -0.233                       | 0.659   | -0.003 | 0.980   | 0.116                     | 0.937   | 0.027  | 0.923   |
| 21         | T3   | -0.032                       | 0.841   | -0.091 | 0.809   | 0.071                     | 0.794   | -0.109 | 0.936   |
| 22         | TP7  | -0.222                       | 0.569   | -0.057 | 0.998   | 0.085                     | 0.853   | -0.022 | 0.984   |
| 23         | CP5  | -0.237                       | 0.425   | -0.025 | 0.923   | 0.107                     | 0.873   | 0.041  | 0.907   |
| 24         | P5   | -0.192                       | 0.875   | -0.002 | 0.989   | 0.127                     | 0.759   | 0.036  | 0.982   |
| 25         | P3   | -0.209                       | 0.581   | 0.004  | 0.975   | 0.130                     | 0.754   | 0.034  | 0.873   |
| 26         | A1   | -0.202                       | 0.446   | -0.088 | 0.858   | 0.075                     | 0.770   | -0.086 | 0.981   |
| 27         | T5   | -0.206                       | 0.655   | -0.119 | 0.829   | 0.073                     | 0.707   | -0.052 | 0.977   |
| 28         | P1   | -0.169                       | 0.739   | -0.005 | 0.979   | 0.038                     | 0.786   | -0.053 | 0.968   |
| 29         | P9   | -0.102                       | 0.969   | -0.045 | 0.995   | 0.087                     | 0.731   | 0.020  | 0.978   |

|    |     |        |       |        |       |        |       |        |       |
|----|-----|--------|-------|--------|-------|--------|-------|--------|-------|
| 30 | PO3 | -0.232 | 0.460 | 0.026  | 0.921 | 0.141  | 0.638 | -0.039 | 0.845 |
| 31 | Pz  | -0.264 | 0.646 | -0.050 | 0.837 | 0.197  | 0.535 | -0.047 | 0.991 |
| 32 | O1  | -0.118 | 0.980 | -0.037 | 0.787 | 0.141  | 0.719 | 0.061  | 0.769 |
| 33 | POz | -0.262 | 0.567 | -0.040 | 0.850 | 0.188  | 0.687 | -0.068 | 0.996 |
| 34 | Oz  | -0.139 | 0.973 | -0.100 | 0.917 | 0.183  | 0.480 | -0.001 | 0.998 |
| 35 | PO4 | -0.130 | 0.931 | -0.003 | 0.989 | 0.156  | 0.700 | 0.006  | 0.985 |
| 36 | O2  | -0.124 | 0.875 | 0.010  | 0.940 | 0.217  | 0.381 | 0.001  | 0.996 |
| 37 | P2  | -0.100 | 0.850 | 0.085  | 0.995 | 0.137  | 0.873 | -0.003 | 0.998 |
| 38 | CP2 | -0.060 | 0.915 | 0.088  | 0.815 | 0.176  | 0.472 | 0.028  | 1.000 |
| 39 | P4  | -0.185 | 0.629 | 0.086  | 0.573 | 0.161  | 0.837 | -0.002 | 0.989 |
| 40 | P10 | -0.204 | 0.960 | -0.062 | 0.982 | 0.241  | 0.670 | 0.060  | 0.983 |
| 41 | T6  | -0.122 | 0.862 | 0.104  | 0.484 | 0.186  | 0.653 | 0.037  | 0.810 |
| 42 | P6  | -0.153 | 0.960 | 0.047  | 0.793 | 0.220  | 0.690 | 0.090  | 0.982 |
| 43 | CP6 | -0.115 | 0.886 | 0.065  | 0.782 | 0.216  | 0.774 | 0.071  | 0.962 |
| 44 | A2  | -0.177 | 0.895 | -0.096 | 0.668 | 0.256  | 0.361 | 0.107  | 0.980 |
| 45 | TP8 | -0.098 | 0.991 | 0.029  | 0.832 | 0.183  | 0.852 | 0.041  | 0.968 |
| 46 | C6  | -0.058 | 0.964 | 0.086  | 0.798 | 0.153  | 0.876 | 0.005  | 0.997 |
| 47 | C4  | -0.101 | 0.907 | 0.064  | 0.714 | 0.179  | 0.874 | 0.059  | 0.922 |
| 48 | C2  | -0.136 | 0.954 | -0.037 | 0.938 | 0.139  | 0.718 | 0.018  | 0.971 |
| 49 | T4  | -0.014 | 0.954 | -0.032 | 0.895 | 0.099  | 0.647 | -0.088 | 0.899 |
| 50 | FC4 | -0.031 | 0.999 | 0.118  | 0.627 | 0.109  | 0.947 | -0.030 | 0.994 |
| 51 | FC2 | -0.073 | 0.890 | -0.035 | 0.980 | 0.078  | 0.921 | -0.041 | 0.935 |
| 52 | FT8 | -0.131 | 0.996 | 0.013  | 0.928 | 0.112  | 0.910 | -0.082 | 0.978 |
| 53 | FC6 | -0.114 | 0.953 | 0.083  | 0.611 | 0.091  | 0.849 | -0.092 | 0.933 |
| 54 | F8  | -0.066 | 0.998 | 0.038  | 0.789 | -0.031 | 0.950 | -0.112 | 0.964 |
| 55 | F6  | -0.188 | 0.793 | 0.027  | 0.943 | 0.028  | 0.912 | -0.170 | 0.977 |
| 56 | F4  | -0.180 | 0.942 | 0.086  | 0.641 | -0.093 | 0.727 | -0.162 | 0.712 |
| 57 | Cz  | -0.068 | 0.943 | -0.013 | 0.942 | 0.152  | 0.602 | -0.019 | 0.968 |

---



**Supplementary Table S13. Correlation analysis result of beta relative power and LF-HRV.**

|            |      | Group 1. Depressive disorder |         |        |               | Group 2. Anxiety disorder |         |        |         |
|------------|------|------------------------------|---------|--------|---------------|---------------------------|---------|--------|---------|
| Electrodes |      | Resting                      |         | Task   |               | Resting                   |         | Task   |         |
| No.        | Name | r                            | p (FDR) | r      | p (FDR)       | r                         | p (FDR) | r      | p (FDR) |
| 01         | AF4  | -0.111                       | 0.647   | -0.346 | <b>0.039*</b> | -0.157                    | 0.862   | -0.085 | 0.787   |
| 02         | F2   | -0.111                       | 0.622   | -0.364 | <b>0.025*</b> | -0.146                    | 0.790   | -0.075 | 0.893   |
| 03         | FCz  | -0.076                       | 0.628   | -0.280 | 0.190         | -0.042                    | 0.960   | -0.067 | 0.924   |
| 04         | Fp2  | -0.064                       | 0.834   | -0.275 | 0.174         | -0.249                    | 0.650   | 0.083  | 0.703   |
| 05         | Fz   | -0.101                       | 0.703   | -0.256 | 0.247         | -0.195                    | 0.626   | -0.143 | 0.770   |
| 06         | FC1  | -0.070                       | 0.764   | -0.231 | 0.265         | -0.043                    | 0.991   | -0.052 | 0.939   |
| 07         | AFz  | -0.123                       | 0.475   | -0.398 | <b>0.010*</b> | -0.160                    | 0.762   | -0.103 | 0.762   |
| 08         | F1   | -0.121                       | 0.606   | -0.344 | <b>0.034*</b> | -0.123                    | 0.818   | -0.063 | 0.973   |
| 09         | Fp1  | -0.081                       | 0.655   | -0.315 | 0.064         | -0.213                    | 0.730   | -0.002 | 0.989   |
| 10         | AF3  | -0.135                       | 0.536   | -0.399 | <b>0.010*</b> | -0.192                    | 0.752   | -0.092 | 0.843   |
| 11         | F3   | -0.148                       | 0.648   | -0.257 | 0.214         | -0.212                    | 0.658   | -0.026 | 0.930   |
| 12         | F5   | -0.164                       | 0.420   | -0.305 | 0.072         | -0.146                    | 0.865   | -0.074 | 0.946   |
| 13         | FC5  | -0.157                       | 0.460   | -0.285 | 0.114         | -0.126                    | 0.753   | -0.043 | 0.942   |
| 14         | FC3  | -0.179                       | 0.345   | -0.321 | 0.070         | -0.095                    | 0.998   | -0.067 | 0.966   |
| 15         | C1   | -0.131                       | 0.526   | -0.266 | 0.178         | -0.043                    | 0.962   | -0.023 | 0.909   |
| 16         | F7   | -0.213                       | 0.277   | -0.279 | 0.162         | -0.166                    | 0.763   | -0.092 | 0.834   |
| 17         | FT7  | -0.202                       | 0.252   | -0.267 | 0.151         | -0.138                    | 0.873   | -0.073 | 0.972   |
| 18         | C3   | -0.203                       | 0.263   | -0.329 | <b>0.049*</b> | -0.073                    | 0.969   | -0.005 | 0.972   |
| 19         | CP1  | -0.130                       | 0.550   | -0.268 | 0.218         | -0.051                    | 0.789   | -0.049 | 0.961   |
| 20         | C5   | -0.257                       | 0.122   | -0.347 | <b>0.028*</b> | -0.089                    | 0.983   | -0.045 | 0.985   |
| 21         | T3   | -0.188                       | 0.417   | -0.188 | 0.535         | -0.173                    | 0.581   | -0.175 | 0.735   |
| 22         | TP7  | -0.232                       | 0.164   | -0.360 | <b>0.028*</b> | -0.139                    | 0.831   | -0.080 | 0.920   |
| 23         | CP5  | -0.241                       | 0.165   | -0.386 | <b>0.021*</b> | -0.138                    | 0.933   | -0.073 | 0.935   |
| 24         | P5   | -0.195                       | 0.215   | -0.395 | <b>0.018*</b> | -0.183                    | 0.740   | -0.116 | 0.777   |
| 25         | P3   | -0.186                       | 0.255   | -0.350 | <b>0.048*</b> | -0.128                    | 0.790   | -0.068 | 0.963   |
| 26         | A1   | -0.195                       | 0.225   | -0.335 | <b>0.046*</b> | -0.154                    | 0.953   | -0.124 | 0.891   |
| 27         | T5   | -0.152                       | 0.382   | -0.364 | 0.070         | -0.200                    | 0.844   | -0.136 | 0.863   |
| 28         | P1   | -0.159                       | 0.348   | -0.318 | 0.080         | -0.087                    | 0.939   | -0.104 | 0.842   |
| 29         | P9   | -0.163                       | 0.333   | -0.348 | 0.054         | -0.186                    | 0.778   | -0.098 | 0.893   |

|    |     |        |       |        |               |        |       |        |       |
|----|-----|--------|-------|--------|---------------|--------|-------|--------|-------|
| 30 | PO3 | -0.160 | 0.346 | -0.331 | 0.057         | -0.127 | 0.857 | -0.111 | 0.966 |
| 31 | Pz  | -0.190 | 0.234 | -0.329 | 0.053         | -0.115 | 0.849 | -0.089 | 0.971 |
| 32 | O1  | -0.189 | 0.301 | -0.388 | <b>0.025*</b> | -0.152 | 0.844 | -0.072 | 0.930 |
| 33 | POz | -0.155 | 0.366 | -0.354 | <b>0.035*</b> | -0.163 | 0.741 | -0.120 | 0.863 |
| 34 | Oz  | -0.137 | 0.366 | -0.358 | <b>0.042*</b> | -0.178 | 0.837 | -0.092 | 0.939 |
| 35 | PO4 | -0.173 | 0.291 | -0.372 | <b>0.023*</b> | -0.164 | 0.631 | -0.109 | 0.925 |
| 36 | O2  | -0.160 | 0.345 | -0.344 | <b>0.039*</b> | -0.155 | 0.868 | -0.107 | 0.979 |
| 37 | P2  | -0.160 | 0.344 | -0.369 | <b>0.029*</b> | -0.124 | 0.952 | -0.066 | 0.955 |
| 38 | CP2 | -0.133 | 0.476 | -0.313 | 0.052         | -0.092 | 0.896 | -0.091 | 0.957 |
| 39 | P4  | -0.150 | 0.438 | -0.347 | <b>0.041*</b> | -0.128 | 0.848 | -0.065 | 0.977 |
| 40 | P10 | -0.029 | 0.903 | -0.271 | 0.170         | -0.131 | 0.814 | -0.080 | 0.955 |
| 41 | T6  | -0.082 | 0.794 | -0.279 | 0.128         | -0.172 | 0.901 | -0.089 | 0.977 |
| 42 | P6  | -0.084 | 0.776 | -0.301 | 0.103         | -0.164 | 0.759 | -0.106 | 0.883 |
| 43 | CP6 | -0.085 | 0.694 | -0.289 | 0.110         | -0.141 | 0.715 | -0.099 | 0.912 |
| 44 | A2  | -0.024 | 0.915 | -0.233 | 0.210         | -0.156 | 0.961 | -0.128 | 0.944 |
| 45 | TP8 | -0.053 | 0.909 | -0.188 | 0.338         | -0.132 | 0.800 | -0.103 | 0.852 |
| 46 | C6  | -0.069 | 0.796 | -0.235 | 0.190         | -0.134 | 0.833 | -0.090 | 0.943 |
| 47 | C4  | -0.071 | 0.786 | -0.173 | 0.330         | -0.121 | 0.962 | -0.047 | 0.983 |
| 48 | C2  | -0.030 | 0.825 | -0.187 | 0.297         | -0.094 | 0.970 | -0.093 | 0.902 |
| 49 | T4  | -0.153 | 0.508 | -0.316 | 0.085         | -0.277 | 0.225 | 0.005  | 0.986 |
| 50 | FC4 | -0.074 | 0.765 | -0.204 | 0.243         | -0.111 | 0.970 | -0.090 | 0.956 |
| 51 | FC2 | -0.006 | 0.964 | -0.137 | 0.458         | -0.111 | 0.873 | -0.133 | 0.789 |
| 52 | FT8 | -0.128 | 0.500 | -0.184 | 0.325         | -0.085 | 0.901 | -0.072 | 0.935 |
| 53 | FC6 | -0.123 | 0.558 | -0.231 | 0.188         | -0.118 | 0.851 | -0.069 | 0.974 |
| 54 | F8  | -0.237 | 0.187 | -0.247 | 0.330         | -0.190 | 0.862 | -0.006 | 0.967 |
| 55 | F6  | -0.126 | 0.602 | -0.243 | 0.230         | -0.122 | 0.887 | -0.067 | 0.966 |
| 56 | F4  | -0.111 | 0.638 | -0.209 | 0.531         | -0.175 | 0.784 | -0.045 | 0.975 |
| 57 | Cz  | -0.089 | 0.557 | -0.273 | 0.123         | -0.088 | 0.789 | -0.112 | 0.888 |

**Supplementary Table S14. Correlation analysis result of gamma absolute power and LF-HRV.**

|            |      | Group 1. Depressive disorder |         |        |         | Group 2. Anxiety disorder |         |        |         |
|------------|------|------------------------------|---------|--------|---------|---------------------------|---------|--------|---------|
| Electrodes |      | Resting                      |         | Task   |         | Resting                   |         | Task   |         |
| No.        | Name | r                            | p (FDR) | r      | p (FDR) | r                         | p (FDR) | r      | p (FDR) |
| 01         | AF4  | -0.245                       | 0.481   | 0.216  | 0.239   | -0.051                    | 0.830   | -0.262 | 0.318   |
| 02         | F2   | -0.234                       | 0.446   | 0.207  | 0.227   | -0.167                    | 0.592   | -0.295 | 0.188   |
| 03         | FCz  | -0.077                       | 0.776   | 0.076  | 0.623   | -0.035                    | 0.869   | -0.113 | 0.885   |
| 04         | Fp2  | -0.189                       | 0.629   | 0.093  | 0.587   | 0.062                     | 0.924   | -0.111 | 0.787   |
| 05         | Fz   | -0.198                       | 0.391   | 0.053  | 0.697   | -0.125                    | 0.604   | -0.127 | 0.787   |
| 06         | FC1  | -0.278                       | 0.366   | 0.046  | 0.868   | 0.114                     | 0.664   | -0.040 | 0.915   |
| 07         | AFz  | -0.226                       | 0.366   | 0.201  | 0.256   | -0.016                    | 0.985   | -0.198 | 0.380   |
| 08         | F1   | -0.200                       | 0.455   | -0.008 | 0.951   | 0.020                     | 0.884   | -0.243 | 0.515   |
| 09         | Fp1  | -0.006                       | 0.964   | 0.000  | 0.998   | 0.063                     | 0.889   | -0.123 | 0.760   |
| 10         | AF3  | -0.137                       | 0.683   | 0.086  | 0.573   | -0.022                    | 0.898   | -0.261 | 0.371   |
| 11         | F3   | -0.145                       | 0.720   | 0.021  | 0.944   | -0.030                    | 0.978   | -0.130 | 0.785   |
| 12         | F5   | -0.221                       | 0.404   | 0.053  | 0.794   | 0.095                     | 0.920   | -0.226 | 0.498   |
| 13         | FC5  | -0.241                       | 0.173   | 0.057  | 0.797   | -0.018                    | 0.962   | -0.296 | 0.251   |
| 14         | FC3  | -0.290                       | 0.204   | 0.057  | 0.756   | -0.025                    | 0.976   | -0.137 | 0.840   |
| 15         | C1   | -0.273                       | 0.285   | 0.005  | 0.971   | 0.097                     | 0.700   | -0.062 | 0.940   |
| 16         | F7   | -0.068                       | 0.891   | 0.032  | 0.991   | 0.144                     | 0.775   | -0.152 | 0.839   |
| 17         | FT7  | -0.268                       | 0.200   | 0.085  | 0.804   | -0.010                    | 0.941   | -0.224 | 0.725   |
| 18         | C3   | -0.313                       | 0.149   | -0.020 | 0.881   | -0.044                    | 0.889   | -0.191 | 0.559   |
| 19         | CP1  | -0.296                       | 0.213   | -0.010 | 0.941   | 0.006                     | 0.965   | -0.087 | 0.963   |
| 20         | C5   | -0.252                       | 0.262   | 0.055  | 0.748   | -0.089                    | 0.755   | -0.110 | 0.865   |
| 21         | T3   | -0.120                       | 0.493   | -0.096 | 0.627   | 0.024                     | 0.994   | -0.144 | 0.908   |
| 22         | TP7  | -0.264                       | 0.214   | -0.034 | 0.991   | -0.085                    | 0.829   | -0.176 | 0.621   |
| 23         | CP5  | -0.271                       | 0.186   | 0.036  | 0.793   | -0.064                    | 0.864   | -0.138 | 0.592   |
| 24         | P5   | -0.264                       | 0.213   | 0.043  | 0.819   | -0.010                    | 0.942   | -0.129 | 0.982   |
| 25         | P3   | -0.259                       | 0.235   | 0.015  | 0.938   | 0.013                     | 0.925   | -0.128 | 0.770   |
| 26         | A1   | -0.239                       | 0.248   | -0.084 | 0.881   | -0.053                    | 0.949   | -0.242 | 0.393   |
| 27         | T5   | -0.325                       | 0.066   | -0.240 | 0.490   | -0.051                    | 0.846   | -0.171 | 0.849   |
| 28         | P1   | -0.256                       | 0.197   | 0.013  | 0.927   | 0.002                     | 0.990   | -0.107 | 0.938   |
| 29         | P9   | -0.198                       | 0.593   | -0.113 | 0.921   | -0.006                    | 0.965   | -0.086 | 0.999   |

|    |     |        |       |        |       |        |       |        |       |
|----|-----|--------|-------|--------|-------|--------|-------|--------|-------|
| 30 | PO3 | -0.267 | 0.250 | 0.077  | 0.743 | 0.177  | 0.723 | -0.090 | 0.865 |
| 31 | Pz  | -0.270 | 0.295 | -0.012 | 0.928 | 0.166  | 0.773 | -0.090 | 0.836 |
| 32 | O1  | -0.258 | 0.239 | -0.164 | 0.845 | 0.196  | 0.593 | -0.016 | 0.910 |
| 33 | POz | -0.287 | 0.240 | -0.053 | 0.903 | 0.213  | 0.565 | -0.136 | 0.929 |
| 34 | Oz  | -0.279 | 0.250 | -0.248 | 0.693 | 0.236  | 0.549 | -0.082 | 0.971 |
| 35 | PO4 | -0.235 | 0.300 | -0.010 | 0.997 | 0.210  | 0.339 | -0.085 | 0.859 |
| 36 | O2  | -0.241 | 0.346 | -0.027 | 0.841 | 0.265  | 0.296 | -0.076 | 0.948 |
| 37 | P2  | -0.211 | 0.383 | 0.117  | 0.858 | 0.072  | 0.952 | -0.107 | 0.875 |
| 38 | CP2 | -0.200 | 0.370 | 0.115  | 0.780 | 0.140  | 0.553 | -0.048 | 0.999 |
| 39 | P4  | -0.281 | 0.133 | 0.085  | 0.595 | 0.038  | 0.949 | -0.156 | 0.978 |
| 40 | P10 | -0.288 | 0.334 | -0.199 | 0.859 | 0.013  | 0.925 | -0.167 | 0.597 |
| 41 | T6  | -0.189 | 0.301 | 0.091  | 0.654 | 0.078  | 0.906 | -0.132 | 0.796 |
| 42 | P6  | -0.303 | 0.213 | 0.034  | 0.870 | 0.144  | 0.971 | -0.094 | 0.914 |
| 43 | CP6 | -0.257 | 0.112 | 0.043  | 0.973 | 0.122  | 0.928 | -0.091 | 0.985 |
| 44 | A2  | -0.125 | 0.606 | -0.041 | 0.908 | 0.073  | 0.999 | -0.093 | 0.932 |
| 45 | TP8 | -0.249 | 0.176 | 0.023  | 0.936 | -0.007 | 0.961 | -0.131 | 0.867 |
| 46 | C6  | -0.169 | 0.459 | 0.190  | 0.297 | -0.022 | 0.946 | -0.170 | 0.934 |
| 47 | C4  | -0.215 | 0.460 | 0.099  | 0.673 | -0.013 | 0.928 | -0.076 | 0.975 |
| 48 | C2  | -0.285 | 0.178 | -0.079 | 0.928 | 0.038  | 0.870 | -0.070 | 0.850 |
| 49 | T4  | 0.061  | 0.946 | 0.003  | 0.980 | 0.134  | 0.678 | -0.173 | 0.829 |
| 50 | FC4 | -0.128 | 0.518 | 0.211  | 0.308 | -0.014 | 0.969 | -0.123 | 0.954 |
| 51 | FC2 | -0.123 | 0.678 | -0.079 | 0.881 | -0.028 | 0.948 | -0.140 | 0.955 |
| 52 | FT8 | -0.225 | 0.479 | 0.081  | 0.886 | -0.078 | 0.801 | -0.199 | 0.679 |
| 53 | FC6 | -0.180 | 0.479 | 0.175  | 0.429 | -0.046 | 0.856 | -0.169 | 0.862 |
| 54 | F8  | -0.132 | 0.535 | 0.112  | 0.737 | -0.093 | 0.729 | -0.150 | 0.913 |
| 55 | F6  | -0.220 | 0.514 | 0.135  | 0.675 | -0.097 | 0.789 | -0.237 | 0.602 |
| 56 | F4  | -0.191 | 0.605 | 0.179  | 0.345 | -0.127 | 0.670 | -0.147 | 0.811 |
| 57 | Cz  | -0.158 | 0.532 | -0.035 | 0.826 | 0.047  | 0.842 | -0.084 | 0.829 |

---

**Supplementary Table S15. Correlation analysis result of gamma relative power and LF-HRV.**

|            |      | Group 1. Depressive disorder |         |        |         | Group 2. Anxiety disorder |         |        |         |
|------------|------|------------------------------|---------|--------|---------|---------------------------|---------|--------|---------|
| Electrodes |      | Resting                      |         | Task   |         | Resting                   |         | Task   |         |
| No.        | Name | r                            | p (FDR) | r      | p (FDR) | r                         | p (FDR) | r      | p (FDR) |
| 01         | AF4  | -0.149                       | 0.440   | -0.114 | 0.582   | -0.122                    | 0.932   | -0.057 | 0.992   |
| 02         | F2   | -0.165                       | 0.511   | -0.146 | 0.449   | -0.101                    | 0.838   | 0.015  | 0.916   |
| 03         | FCz  | -0.177                       | 0.383   | -0.188 | 0.404   | -0.089                    | 0.994   | -0.032 | 0.837   |
| 04         | Fp2  | -0.053                       | 0.701   | -0.143 | 0.848   | 0.001                     | 0.994   | -0.072 | 0.884   |
| 05         | Fz   | -0.087                       | 0.835   | -0.180 | 0.528   | -0.032                    | 0.915   | -0.054 | 0.945   |
| 06         | FC1  | -0.196                       | 0.340   | -0.181 | 0.395   | -0.068                    | 0.949   | -0.012 | 0.962   |
| 07         | AFz  | -0.115                       | 0.677   | -0.174 | 0.387   | -0.069                    | 0.928   | -0.022 | 0.999   |
| 08         | F1   | -0.157                       | 0.641   | -0.243 | 0.154   | -0.049                    | 0.999   | -0.025 | 0.996   |
| 09         | Fp1  | -0.039                       | 0.941   | -0.247 | 0.430   | -0.006                    | 0.994   | -0.090 | 0.991   |
| 10         | AF3  | -0.070                       | 0.876   | -0.196 | 0.295   | -0.116                    | 0.934   | -0.072 | 0.956   |
| 11         | F3   | -0.157                       | 0.643   | -0.179 | 0.472   | -0.105                    | 0.852   | -0.178 | 0.675   |
| 12         | F5   | -0.162                       | 0.603   | -0.147 | 0.455   | -0.083                    | 0.998   | -0.077 | 0.987   |
| 13         | FC5  | -0.209                       | 0.314   | -0.191 | 0.343   | -0.112                    | 0.990   | -0.101 | 0.876   |
| 14         | FC3  | -0.227                       | 0.270   | -0.182 | 0.334   | -0.138                    | 0.938   | -0.022 | 0.991   |
| 15         | C1   | -0.197                       | 0.280   | -0.189 | 0.354   | -0.061                    | 0.967   | -0.001 | 0.997   |
| 16         | F7   | -0.170                       | 0.713   | -0.151 | 0.489   | -0.087                    | 0.628   | -0.200 | 0.633   |
| 17         | FT7  | -0.245                       | 0.256   | -0.210 | 0.263   | -0.095                    | 0.887   | -0.081 | 0.812   |
| 18         | C3   | -0.229                       | 0.283   | -0.201 | 0.298   | -0.124                    | 0.735   | -0.060 | 0.979   |
| 19         | CP1  | -0.198                       | 0.300   | -0.184 | 0.361   | -0.143                    | 0.870   | -0.101 | 0.870   |
| 20         | C5   | -0.289                       | 0.124   | -0.210 | 0.248   | -0.159                    | 0.763   | -0.049 | 0.982   |
| 21         | T3   | -0.230                       | 0.528   | -0.208 | 0.350   | -0.133                    | 0.988   | -0.301 | 0.166   |
| 22         | TP7  | -0.282                       | 0.141   | -0.219 | 0.193   | -0.162                    | 0.925   | -0.088 | 0.788   |
| 23         | CP5  | -0.270                       | 0.192   | -0.215 | 0.243   | -0.165                    | 0.876   | -0.070 | 0.909   |
| 24         | P5   | -0.253                       | 0.259   | -0.276 | 0.148   | -0.173                    | 0.819   | -0.096 | 0.897   |
| 25         | P3   | -0.228                       | 0.397   | -0.261 | 0.134   | -0.119                    | 0.973   | -0.045 | 0.986   |
| 26         | A1   | -0.233                       | 0.256   | -0.216 | 0.217   | -0.173                    | 0.802   | -0.217 | 0.496   |
| 27         | T5   | -0.262                       | 0.222   | -0.316 | 0.077   | -0.211                    | 0.625   | -0.084 | 0.978   |
| 28         | P1   | -0.231                       | 0.305   | -0.249 | 0.166   | -0.055                    | 0.993   | -0.048 | 0.956   |
| 29         | P9   | -0.251                       | 0.200   | -0.306 | 0.071   | -0.153                    | 0.770   | -0.045 | 0.984   |

|    |     |        |       |        |       |        |       |        |       |
|----|-----|--------|-------|--------|-------|--------|-------|--------|-------|
| 30 | PO3 | -0.246 | 0.293 | -0.247 | 0.186 | -0.009 | 0.978 | -0.042 | 0.918 |
| 31 | Pz  | -0.216 | 0.435 | -0.201 | 0.525 | -0.076 | 0.887 | -0.080 | 0.871 |
| 32 | O1  | -0.240 | 0.323 | -0.353 | 0.083 | -0.003 | 0.985 | 0.026  | 0.851 |
| 33 | POz | -0.214 | 0.448 | -0.241 | 0.312 | -0.020 | 0.902 | -0.025 | 0.962 |
| 34 | Oz  | -0.215 | 0.451 | -0.307 | 0.136 | -0.017 | 0.931 | 0.006  | 0.964 |
| 35 | PO4 | -0.218 | 0.387 | -0.242 | 0.301 | -0.011 | 0.939 | -0.016 | 0.911 |
| 36 | O2  | -0.207 | 0.542 | -0.252 | 0.259 | 0.033  | 0.959 | 0.043  | 0.759 |
| 37 | P2  | -0.209 | 0.479 | -0.226 | 0.238 | -0.016 | 0.996 | 0.044  | 0.766 |
| 38 | CP2 | -0.252 | 0.265 | -0.218 | 0.231 | -0.030 | 0.993 | 0.042  | 0.901 |
| 39 | P4  | -0.253 | 0.169 | -0.209 | 0.256 | -0.125 | 0.937 | -0.028 | 0.841 |
| 40 | P10 | -0.146 | 0.682 | -0.259 | 0.175 | -0.235 | 0.376 | -0.150 | 0.727 |
| 41 | T6  | -0.163 | 0.372 | -0.174 | 0.339 | -0.207 | 0.395 | -0.087 | 0.803 |
| 42 | P6  | -0.216 | 0.301 | -0.218 | 0.231 | -0.157 | 0.747 | -0.064 | 0.859 |
| 43 | CP6 | -0.244 | 0.152 | -0.249 | 0.155 | -0.121 | 0.971 | -0.068 | 0.812 |
| 44 | A2  | -0.037 | 0.785 | -0.139 | 0.498 | -0.187 | 0.468 | -0.157 | 0.497 |
| 45 | TP8 | -0.236 | 0.174 | -0.160 | 0.441 | -0.189 | 0.720 | -0.086 | 0.897 |
| 46 | C6  | -0.240 | 0.239 | -0.107 | 0.609 | -0.167 | 0.740 | -0.143 | 0.738 |
| 47 | C4  | -0.269 | 0.196 | -0.151 | 0.483 | -0.146 | 0.829 | -0.017 | 0.979 |
| 48 | C2  | -0.241 | 0.237 | -0.202 | 0.280 | -0.084 | 0.911 | 0.004  | 0.980 |
| 49 | T4  | -0.093 | 0.616 | -0.146 | 0.467 | -0.121 | 0.897 | -0.238 | 0.852 |
| 50 | FC4 | -0.224 | 0.381 | -0.140 | 0.440 | -0.126 | 0.796 | -0.011 | 0.997 |
| 51 | FC2 | -0.162 | 0.570 | -0.186 | 0.368 | -0.089 | 0.956 | 0.009  | 0.997 |
| 52 | FT8 | -0.237 | 0.276 | -0.096 | 0.627 | -0.160 | 0.810 | -0.086 | 0.981 |
| 53 | FC6 | -0.210 | 0.408 | -0.150 | 0.439 | -0.149 | 0.850 | -0.029 | 0.991 |
| 54 | F8  | -0.196 | 0.476 | -0.067 | 0.780 | -0.212 | 0.360 | -0.232 | 0.419 |
| 55 | F6  | -0.192 | 0.450 | -0.072 | 0.707 | -0.151 | 0.918 | -0.058 | 0.987 |
| 56 | F4  | -0.082 | 0.746 | -0.119 | 0.619 | -0.168 | 0.797 | -0.155 | 0.761 |
| 57 | Cz  | -0.121 | 0.559 | -0.253 | 0.195 | -0.077 | 0.985 | -0.187 | 0.457 |

---

**Supplementary Table S16. Correlation analysis result of delta absolute power and HF-HRV.**

|            |      | Group 1. Depressive disorder |         |       |               | Group 2. Anxiety disorder |         |        |         |
|------------|------|------------------------------|---------|-------|---------------|---------------------------|---------|--------|---------|
| Electrodes |      | Resting                      |         | Task  |               | Resting                   |         | Task   |         |
| No.        | Name | r                            | p (FDR) | r     | p (FDR)       | r                         | p (FDR) | r      | p (FDR) |
| 01         | AF4  | -0.112                       | 0.643   | 0.420 | <b>0.006*</b> | -0.072                    | 0.852   | -0.157 | 0.457   |
| 02         | F2   | -0.074                       | 0.696   | 0.487 | <b>0.001*</b> | -0.166                    | 0.746   | -0.144 | 0.708   |
| 03         | FCz  | 0.099                        | 0.608   | 0.34  | <b>0.044*</b> | -0.066                    | 0.941   | 0.047  | 0.957   |
| 04         | Fp2  | -0.056                       | 0.807   | 0.408 | <b>0.022*</b> | -0.071                    | 0.846   | -0.140 | 0.653   |
| 05         | Fz   | 0.000                        | 0.999   | 0.467 | <b>0.004*</b> | -0.092                    | 0.920   | -0.121 | 0.684   |
| 06         | FC1  | -0.119                       | 0.696   | 0.195 | 0.389         | -0.013                    | 0.950   | 0.024  | 0.947   |
| 07         | AFz  | -0.051                       | 0.767   | 0.479 | <b>0.001*</b> | -0.058                    | 0.794   | 0.003  | 0.982   |
| 08         | F1   | -0.028                       | 0.948   | 0.371 | <b>0.021*</b> | -0.008                    | 0.956   | -0.053 | 0.869   |
| 09         | Fp1  | 0.041                        | 0.91    | 0.369 | <b>0.022*</b> | -0.021                    | 0.956   | -0.14  | 0.575   |
| 10         | AF3  | -0.05                        | 0.989   | 0.410 | <b>0.006*</b> | -0.091                    | 0.843   | -0.088 | 0.761   |
| 11         | F3   | 0.001                        | 0.995   | 0.345 | <b>0.033*</b> | -0.11                     | 0.815   | -0.167 | 0.690   |
| 12         | F5   | -0.044                       | 0.887   | 0.32  | <b>0.042*</b> | 0.027                     | 0.918   | -0.109 | 0.704   |
| 13         | FC5  | 0.009                        | 0.977   | 0.361 | <b>0.017*</b> | 0.034                     | 0.915   | -0.109 | 0.776   |
| 14         | FC3  | -0.064                       | 0.808   | 0.331 | <b>0.033*</b> | -0.009                    | 0.984   | 0.000  | 1.000   |
| 15         | C1   | -0.099                       | 0.759   | 0.261 | 0.136         | 0.033                     | 0.878   | -0.022 | 0.983   |
| 16         | F7   | 0.046                        | 0.873   | 0.233 | 0.217         | 0.081                     | 0.971   | -0.159 | 0.707   |
| 17         | FT7  | -0.006                       | 0.968   | 0.286 | 0.084         | 0.059                     | 0.938   | -0.089 | 0.885   |
| 18         | C3   | -0.100                       | 0.863   | 0.261 | 0.135         | -0.042                    | 0.812   | -0.066 | 0.976   |
| 19         | CP1  | -0.091                       | 0.722   | 0.255 | 0.150         | 0.019                     | 0.893   | -0.018 | 0.946   |
| 20         | C5   | -0.029                       | 0.865   | 0.288 | 0.081         | -0.083                    | 0.862   | -0.032 | 0.986   |
| 21         | T3   | 0.141                        | 0.497   | 0.184 | 0.479         | -0.101                    | 0.783   | -0.121 | 0.913   |
| 22         | TP7  | -0.047                       | 0.789   | 0.277 | 0.100         | -0.038                    | 0.867   | -0.054 | 0.871   |
| 23         | CP5  | -0.047                       | 0.951   | 0.307 | 0.055         | -0.055                    | 0.854   | -0.046 | 0.969   |
| 24         | P5   | -0.022                       | 0.992   | 0.347 | <b>0.029*</b> | 0.023                     | 0.938   | -0.03  | 0.927   |
| 25         | P3   | -0.035                       | 0.994   | 0.324 | <b>0.039*</b> | 0.003                     | 0.982   | -0.054 | 0.957   |
| 26         | A1   | 0.004                        | 0.974   | 0.251 | 0.269         | -0.01                     | 0.975   | -0.068 | 0.946   |
| 27         | T5   | -0.05                        | 0.957   | 0.170 | 0.545         | 0.02                      | 0.9     | -0.058 | 0.920   |
| 28         | P1   | 0.002                        | 0.99    | 0.269 | 0.145         | -0.06                     | 0.869   | -0.071 | 0.963   |
| 29         | P9   | 0.048                        | 0.795   | 0.341 | 0.059         | 0.057                     | 0.809   | 0.026  | 0.986   |

|    |     |        |       |       |               |        |       |        |       |
|----|-----|--------|-------|-------|---------------|--------|-------|--------|-------|
| 30 | PO3 | -0.007 | 0.961 | 0.332 | <b>0.040*</b> | -0.112 | 0.782 | -0.079 | 0.928 |
| 31 | Pz  | -0.002 | 0.988 | 0.278 | 0.123         | -0.078 | 0.829 | -0.105 | 0.9   |
| 32 | O1  | 0.087  | 0.566 | 0.262 | 0.154         | -0.006 | 0.982 | 0.055  | 0.98  |
| 33 | POz | -0.022 | 0.923 | 0.298 | 0.084         | -0.091 | 0.813 | -0.104 | 0.94  |
| 34 | Oz  | 0.016  | 0.918 | 0.127 | 0.629         | -0.029 | 0.979 | 0.024  | 0.991 |
| 35 | PO4 | 0.053  | 0.911 | 0.247 | 0.214         | -0.097 | 0.687 | -0.1   | 0.955 |
| 36 | O2  | -0.014 | 0.962 | 0.232 | 0.222         | -0.058 | 0.797 | 0      | 0.997 |
| 37 | P2  | 0.058  | 0.898 | 0.286 | 0.084         | -0.142 | 0.606 | -0.137 | 0.848 |
| 38 | CP2 | 0.056  | 0.907 | 0.352 | <b>0.020*</b> | 0.002  | 0.986 | -0.047 | 0.98  |
| 39 | P4  | 0.009  | 0.949 | 0.371 | <b>0.013*</b> | -0.055 | 0.802 | -0.115 | 0.979 |
| 40 | P10 | -0.075 | 0.913 | 0.279 | 0.098         | -0.031 | 0.943 | -0.094 | 0.932 |
| 41 | T6  | 0.021  | 0.94  | 0.397 | <b>0.012*</b> | 0.06   | 0.785 | -0.048 | 0.894 |
| 42 | P6  | -0.008 | 0.99  | 0.38  | <b>0.012*</b> | 0.002  | 0.994 | -0.03  | 0.997 |
| 43 | CP6 | 0.041  | 0.932 | 0.359 | <b>0.021*</b> | 0.013  | 0.974 | -0.031 | 0.954 |
| 44 | A2  | 0.013  | 0.938 | 0.34  | <b>0.034*</b> | 0.117  | 0.975 | -0.024 | 0.967 |
| 45 | TP8 | 0.064  | 0.914 | 0.319 | <b>0.043*</b> | -0.035 | 0.968 | -0.073 | 0.925 |
| 46 | C6  | 0.025  | 0.993 | 0.361 | <b>0.016*</b> | -0.035 | 0.949 | -0.103 | 0.978 |
| 47 | C4  | -0.012 | 0.999 | 0.298 | 0.067         | -0.053 | 0.945 | -0.114 | 0.997 |
| 48 | C2  | -0.071 | 0.747 | 0.204 | 0.338         | -0.11  | 0.777 | -0.084 | 0.91  |
| 49 | T4  | 0.176  | 0.579 | 0.398 | <b>0.020*</b> | 0.151  | 0.792 | -0.125 | 0.85  |
| 50 | FC4 | 0.016  | 0.905 | 0.345 | <b>0.024*</b> | -0.147 | 0.729 | -0.145 | 0.871 |
| 51 | FC2 | -0.033 | 0.947 | 0.209 | 0.274         | -0.181 | 0.668 | -0.095 | 0.966 |
| 52 | FT8 | 0.018  | 0.892 | 0.253 | 0.155         | -0.004 | 0.977 | -0.130 | 0.693 |
| 53 | FC6 | 0.015  | 0.914 | 0.403 | <b>0.006*</b> | -0.081 | 0.918 | -0.137 | 0.837 |
| 54 | F8  | 0.073  | 0.698 | 0.325 | <b>0.048*</b> | 0.110  | 0.966 | -0.155 | 0.773 |
| 55 | F6  | -0.057 | 0.944 | 0.276 | 0.103         | -0.06  | 0.969 | -0.181 | 0.414 |
| 56 | F4  | -0.042 | 0.852 | 0.422 | <b>0.004*</b> | -0.023 | 0.989 | -0.176 | 0.541 |
| 57 | Cz  | 0.080  | 0.659 | 0.349 | <b>0.036*</b> | 0.016  | 0.917 | -0.100 | 0.945 |



**Supplementary Table S17. Correlation analysis result of delta relative power and HF-HRV.**

|            |      | Group 1. Depressive disorder |         |       |         | Group 2. Anxiety disorder |         |        |         |
|------------|------|------------------------------|---------|-------|---------|---------------------------|---------|--------|---------|
| Electrodes |      | Resting                      |         | Task  |         | Resting                   |         | Task   |         |
| No.        | Name | r                            | p (FDR) | r     | p (FDR) | r                         | p (FDR) | r      | p (FDR) |
| 01         | AF4  | -0.151                       | 0.831   | 0.169 | 0.462   | 0.027                     | 0.948   | 0.006  | 0.963   |
| 02         | F2   | -0.138                       | 0.848   | 0.169 | 0.463   | -0.059                    | 0.873   | -0.026 | 0.981   |
| 03         | FCz  | -0.091                       | 0.912   | 0.105 | 0.640   | -0.212                    | 0.406   | 0.056  | 0.966   |
| 04         | Fp2  | -0.119                       | 0.96    | 0.286 | 0.142   | -0.002                    | 0.986   | -0.025 | 0.96    |
| 05         | Fz   | -0.081                       | 0.981   | 0.271 | 0.141   | -0.027                    | 0.968   | 0.072  | 0.984   |
| 06         | FC1  | -0.079                       | 0.982   | 0.156 | 0.501   | -0.21                     | 0.345   | 0.001  | 0.993   |
| 07         | AFz  | -0.132                       | 0.94    | 0.276 | 0.172   | -0.043                    | 0.898   | 0.094  | 0.966   |
| 08         | F1   | -0.112                       | 0.865   | 0.208 | 0.280   | -0.028                    | 0.859   | 0.024  | 0.88    |
| 09         | Fp1  | -0.071                       | 0.978   | 0.308 | 0.068   | 0.013                     | 0.98    | 0.011  | 0.984   |
| 10         | AF3  | -0.055                       | 0.931   | 0.248 | 0.171   | 0.061                     | 0.862   | 0.056  | 0.891   |
| 11         | F3   | 0.009                        | 0.946   | 0.199 | 0.370   | 0.004                     | 0.977   | -0.031 | 0.961   |
| 12         | F5   | -0.029                       | 0.899   | 0.16  | 0.389   | 0.042                     | 0.889   | -0.016 | 0.906   |
| 13         | FC5  | -0.044                       | 0.875   | 0.136 | 0.460   | -0.043                    | 0.805   | -0.024 | 0.948   |
| 14         | FC3  | -0.081                       | 0.811   | 0.19  | 0.262   | -0.158                    | 0.299   | 0.007  | 0.962   |
| 15         | C1   | -0.044                       | 0.858   | 0.195 | 0.323   | -0.242                    | 0.218   | -0.02  | 0.885   |
| 16         | F7   | 0.044                        | 0.747   | 0.204 | 0.425   | -0.083                    | 0.748   | -0.066 | 0.991   |
| 17         | FT7  | -0.023                       | 0.869   | 0.128 | 0.547   | -0.005                    | 0.978   | -0.008 | 0.956   |
| 18         | C3   | -0.012                       | 0.928   | 0.262 | 0.166   | -0.178                    | 0.286   | -0.04  | 0.944   |
| 19         | CP1  | -0.027                       | 0.841   | 0.218 | 0.230   | -0.212                    | 0.261   | -0.011 | 0.939   |
| 20         | C5   | -0.01                        | 0.944   | 0.239 | 0.247   | -0.183                    | 0.318   | -0.007 | 0.961   |
| 21         | T3   | -0.031                       | 0.885   | 0.066 | 0.682   | -0.269                    | 0.263   | 0.015  | 0.983   |
| 22         | TP7  | -0.045                       | 0.792   | 0.242 | 0.232   | -0.159                    | 0.326   | -0.013 | 0.925   |
| 23         | CP5  | -0.037                       | 0.904   | 0.279 | 0.12    | -0.192                    | 0.295   | -0.053 | 0.872   |
| 24         | P5   | -0.054                       | 0.985   | 0.268 | 0.149   | -0.16                     | 0.385   | -0.03  | 0.831   |
| 25         | P3   | -0.061                       | 0.95    | 0.214 | 0.247   | -0.135                    | 0.533   | -0.028 | 0.838   |
| 26         | A1   | -0.016                       | 0.957   | 0.231 | 0.28    | -0.255                    | 0.212   | -0.012 | 0.974   |
| 27         | T5   | -0.085                       | 0.92    | 0.16  | 0.39    | -0.167                    | 0.411   | -0.003 | 0.983   |
| 28         | P1   | -0.06                        | 0.999   | 0.119 | 0.555   | -0.154                    | 0.566   | -0.007 | 0.962   |
| 29         | P9   | -0.092                       | 0.911   | 0.209 | 0.257   | -0.203                    | 0.347   | 0.049  | 0.901   |

|    |     |        |       |       |       |        |       |        |       |
|----|-----|--------|-------|-------|-------|--------|-------|--------|-------|
| 30 | PO3 | -0.066 | 0.902 | 0.141 | 0.434 | -0.202 | 0.37  | -0.005 | 0.989 |
| 31 | Pz  | 0.01   | 0.948 | 0.166 | 0.322 | -0.226 | 0.262 | -0.015 | 0.954 |
| 32 | O1  | -0.106 | 0.994 | 0.011 | 0.995 | -0.204 | 0.3   | -0.007 | 0.959 |
| 33 | POz | -0.025 | 0.933 | 0.156 | 0.364 | -0.208 | 0.302 | 0.02   | 0.975 |
| 34 | Oz  | -0.079 | 0.971 | 0.022 | 0.943 | -0.169 | 0.478 | 0.03   | 0.991 |
| 35 | PO4 | -0.02  | 0.945 | 0.114 | 0.581 | -0.172 | 0.397 | 0.056  | 0.935 |
| 36 | O2  | -0.09  | 0.973 | 0.032 | 0.92  | -0.194 | 0.394 | 0.053  | 0.948 |
| 37 | P2  | -0.073 | 0.92  | 0.108 | 0.556 | -0.144 | 0.614 | 0.01   | 0.943 |
| 38 | CP2 | -0.083 | 0.941 | 0.129 | 0.56  | -0.23  | 0.246 | 0.012  | 0.941 |
| 39 | P4  | -0.127 | 0.917 | 0.122 | 0.601 | -0.149 | 0.527 | -0.011 | 0.938 |
| 40 | P10 | -0.078 | 0.861 | 0.214 | 0.244 | -0.216 | 0.379 | -0.012 | 0.997 |
| 41 | T6  | -0.099 | 0.911 | 0.165 | 0.452 | -0.191 | 0.394 | -0.065 | 0.885 |
| 42 | P6  | -0.077 | 0.972 | 0.22  | 0.224 | -0.217 | 0.298 | -0.034 | 0.95  |
| 43 | CP6 | -0.097 | 0.93  | 0.19  | 0.316 | -0.173 | 0.455 | -0.016 | 0.911 |
| 44 | A2  | -0.043 | 0.883 | 0.18  | 0.299 | -0.168 | 0.605 | -0.008 | 0.999 |
| 45 | TP8 | -0.053 | 0.958 | 0.192 | 0.285 | -0.161 | 0.456 | -0.086 | 0.778 |
| 46 | C6  | -0.098 | 0.966 | 0.233 | 0.239 | -0.127 | 0.49  | -0.074 | 0.822 |
| 47 | C4  | -0.115 | 0.989 | 0.129 | 0.559 | -0.175 | 0.353 | -0.091 | 0.729 |
| 48 | C2  | -0.107 | 0.973 | 0.181 | 0.339 | -0.183 | 0.4   | 0.01   | 0.963 |
| 49 | T4  | 0.041  | 0.767 | 0.225 | 0.217 | -0.074 | 0.771 | -0.006 | 0.966 |
| 50 | FC4 | -0.166 | 0.722 | 0.126 | 0.524 | -0.192 | 0.41  | -0.052 | 0.853 |
| 51 | FC2 | -0.098 | 0.908 | 0.128 | 0.563 | -0.219 | 0.366 | -0.005 | 0.97  |
| 52 | FT8 | -0.069 | 0.872 | 0.146 | 0.504 | 0.028  | 0.983 | -0.08  | 0.819 |
| 53 | FC6 | -0.135 | 0.956 | 0.149 | 0.444 | -0.04  | 0.837 | -0.06  | 0.807 |
| 54 | F8  | 0.066  | 0.741 | 0.221 | 0.266 | -0.056 | 0.894 | -0.181 | 0.44  |
| 55 | F6  | -0.112 | 0.918 | 0.137 | 0.511 | 0.028  | 0.963 | -0.077 | 0.838 |
| 56 | F4  | -0.012 | 0.929 | 0.242 | 0.236 | -0.006 | 0.964 | -0.052 | 0.854 |
| 57 | Cz  | -0.015 | 0.977 | 0.237 | 0.154 | -0.231 | 0.311 | 0.011  | 0.953 |

---

**Supplementary Table S18. Correlation analysis result of theta absolute power and HF-HRV.**

|            |      | Group 1. Depressive disorder |         |       |         | Group 2. Anxiety disorder |         |        |         |
|------------|------|------------------------------|---------|-------|---------|---------------------------|---------|--------|---------|
| Electrodes |      | Resting                      |         | Task  |         | Resting                   |         | Task   |         |
| No.        | Name | r                            | p (FDR) | r     | p (FDR) | r                         | p (FDR) | r      | p (FDR) |
| 01         | AF4  | -0.085                       | 0.686   | 0.291 | 0.097   | 0.002                     | 0.991   | -0.063 | 1.000   |
| 02         | F2   | -0.024                       | 0.858   | 0.295 | 0.117   | -0.06                     | 0.938   | -0.061 | 0.996   |
| 03         | FCz  | 0.149                        | 0.508   | 0.247 | 0.227   | 0.062                     | 0.922   | 0.041  | 0.916   |
| 04         | Fp2  | -0.024                       | 0.91    | 0.292 | 0.189   | 0.071                     | 0.866   | -0.102 | 0.856   |
| 05         | Fz   | 0.06                         | 0.783   | 0.26  | 0.171   | 0.03                      | 0.831   | -0.106 | 0.803   |
| 06         | FC1  | -0.094                       | 0.784   | 0.075 | 0.927   | 0.104                     | 0.713   | 0.054  | 0.825   |
| 07         | AFz  | 0.021                        | 0.896   | 0.364 | 0.074   | 0.027                     | 0.969   | 0.003  | 0.983   |
| 08         | F1   | 0.02                         | 0.883   | 0.204 | 0.287   | 0.051                     | 0.884   | 0.024  | 0.863   |
| 09         | Fp1  | 0.01                         | 0.967   | 0.223 | 0.271   | 0.075                     | 0.976   | -0.107 | 0.839   |
| 10         | AF3  | -0.066                       | 0.787   | 0.28  | 0.158   | -0.031                    | 0.973   | -0.005 | 0.987   |
| 11         | F3   | 0.002                        | 0.986   | 0.199 | 0.304   | 0.014                     | 0.917   | -0.117 | 0.861   |
| 12         | F5   | -0.069                       | 0.75    | 0.193 | 0.319   | 0.067                     | 0.742   | 0.02   | 0.951   |
| 13         | FC5  | -0.002                       | 0.989   | 0.246 | 0.2     | 0.078                     | 0.808   | 0.024  | 0.921   |
| 14         | FC3  | -0.065                       | 0.689   | 0.184 | 0.38    | 0.091                     | 0.913   | 0.097  | 0.879   |
| 15         | C1   | -0.067                       | 0.676   | 0.129 | 0.625   | 0.103                     | 0.848   | 0.031  | 0.84    |
| 16         | F7   | 0.058                        | 0.925   | 0.099 | 0.573   | 0.147                     | 0.946   | -0.12  | 0.838   |
| 17         | FT7  | -0.012                       | 0.987   | 0.2   | 0.26    | 0.09                      | 0.776   | 0.008  | 0.997   |
| 18         | C3   | -0.084                       | 0.874   | 0.12  | 0.548   | 0.092                     | 0.945   | 0.054  | 0.922   |
| 19         | CP1  | -0.043                       | 0.819   | 0.106 | 0.71    | 0.109                     | 0.802   | 0.022  | 0.884   |
| 20         | C5   | -0.014                       | 0.918   | 0.173 | 0.332   | 0.078                     | 0.902   | 0.054  | 0.877   |
| 21         | T3   | 0.183                        | 0.367   | 0.087 | 0.811   | 0.119                     | 0.599   | -0.088 | 0.976   |
| 22         | TP7  | -0.013                       | 0.927   | 0.149 | 0.461   | 0.108                     | 0.855   | 0.022  | 0.943   |
| 23         | CP5  | -0.02                        | 0.994   | 0.16  | 0.375   | 0.115                     | 0.785   | 0.071  | 0.85    |
| 24         | P5   | 0.001                        | 0.993   | 0.198 | 0.361   | 0.15                      | 0.682   | 0.076  | 0.839   |
| 25         | P3   | -0.015                       | 0.984   | 0.161 | 0.434   | 0.129                     | 0.822   | 0.073  | 0.912   |
| 26         | A1   | 0.046                        | 0.906   | 0.135 | 0.678   | 0.194                     | 0.645   | 0.022  | 0.876   |
| 27         | T5   | 0.005                        | 0.971   | 0.084 | 0.779   | 0.121                     | 0.726   | 0.023  | 0.919   |
| 28         | P1   | 0.021                        | 0.914   | 0.145 | 0.536   | 0.101                     | 0.913   | 0.018  | 0.956   |
| 29         | P9   | 0.095                        | 0.636   | 0.205 | 0.399   | 0.174                     | 0.541   | 0.093  | 0.77    |

|    |     |        |       |       |       |        |       |        |       |
|----|-----|--------|-------|-------|-------|--------|-------|--------|-------|
| 30 | PO3 | -0.008 | 0.969 | 0.167 | 0.473 | 0.062  | 0.83  | -0.017 | 0.902 |
| 31 | Pz  | -0.041 | 0.829 | 0.111 | 0.493 | 0.082  | 0.728 | -0.08  | 0.973 |
| 32 | O1  | 0.062  | 0.705 | 0.161 | 0.486 | 0.137  | 0.703 | 0.143  | 0.924 |
| 33 | POz | -0.062 | 0.702 | 0.116 | 0.638 | 0.058  | 0.883 | -0.03  | 0.957 |
| 34 | Oz  | -0.03  | 0.914 | 0.035 | 0.936 | 0.109  | 0.624 | 0.108  | 0.998 |
| 35 | PO4 | -0.012 | 0.928 | 0.077 | 0.747 | 0.055  | 0.882 | -0.052 | 0.927 |
| 36 | O2  | -0.019 | 0.951 | 0.134 | 0.537 | 0.101  | 0.641 | 0.086  | 0.772 |
| 37 | P2  | 0.039  | 0.988 | 0.111 | 0.542 | 0.028  | 0.992 | -0.02  | 0.883 |
| 38 | CP2 | 0.074  | 0.85  | 0.174 | 0.418 | 0.098  | 0.784 | -0.015 | 0.977 |
| 39 | P4  | 0.038  | 0.843 | 0.192 | 0.256 | 0.083  | 0.798 | -0.002 | 0.99  |
| 40 | P10 | -0.046 | 0.835 | 0.091 | 0.661 | 0.136  | 0.534 | 0.027  | 0.848 |
| 41 | T6  | 0.059  | 0.746 | 0.203 | 0.333 | 0.176  | 0.546 | 0.078  | 0.77  |
| 42 | P6  | 0.021  | 0.941 | 0.161 | 0.398 | 0.126  | 0.592 | 0.07   | 0.785 |
| 43 | CP6 | 0.074  | 0.87  | 0.185 | 0.322 | 0.112  | 0.681 | 0.052  | 0.996 |
| 44 | A2  | 0.028  | 0.922 | 0.142 | 0.654 | 0.171  | 0.566 | 0.044  | 0.812 |
| 45 | TP8 | 0.071  | 0.849 | 0.143 | 0.477 | 0.069  | 0.844 | 0.033  | 0.936 |
| 46 | C6  | 0.06   | 0.99  | 0.169 | 0.358 | 0.052  | 0.9   | -0.007 | 0.998 |
| 47 | C4  | 0.03   | 0.991 | 0.192 | 0.339 | 0.053  | 0.887 | -0.024 | 0.934 |
| 48 | C2  | -0.037 | 0.952 | 0.066 | 0.96  | -0.002 | 0.989 | -0.05  | 0.928 |
| 49 | T4  | 0.155  | 0.655 | 0.223 | 0.258 | 0.207  | 0.431 | -0.099 | 0.999 |
| 50 | FC4 | 0.055  | 0.891 | 0.205 | 0.338 | 0.003  | 0.983 | -0.044 | 0.948 |
| 51 | FC2 | 0.002  | 0.994 | 0.091 | 0.962 | -0.032 | 0.921 | -0.067 | 0.834 |
| 52 | FT8 | 0.046  | 0.958 | 0.129 | 0.635 | 0.028  | 0.912 | 0.003  | 0.986 |
| 53 | FC6 | 0.052  | 0.881 | 0.258 | 0.216 | 0.014  | 0.987 | -0.021 | 0.972 |
| 54 | F8  | 0.11   | 0.672 | 0.194 | 0.331 | 0.159  | 0.831 | -0.099 | 0.922 |
| 55 | F6  | -0.024 | 0.997 | 0.175 | 0.367 | 0.004  | 0.974 | -0.032 | 0.927 |
| 56 | F4  | -0.022 | 0.871 | 0.216 | 0.229 | 0.084  | 0.99  | -0.116 | 0.872 |
| 57 | Cz  | 0.132  | 0.598 | 0.201 | 0.299 | 0.137  | 0.72  | -0.081 | 0.939 |

---

**Supplementary Table S19. Correlation analysis result of theta relative power and HF-HRV.**

|            |      | Group 1. Depressive disorder |         |        |         | Group 2. Anxiety disorder |         |       |         |
|------------|------|------------------------------|---------|--------|---------|---------------------------|---------|-------|---------|
| Electrodes |      | Resting                      |         | Task   |         | Resting                   |         | Task  |         |
| No.        | Name | r                            | p (FDR) | r      | p (FDR) | r                         | p (FDR) | r     | p (FDR) |
| 01         | AF4  | 0.009                        | 0.975   | -0.038 | 0.923   | 0.033                     | 0.882   | 0.216 | 0.333   |
| 02         | F2   | -0.013                       | 0.941   | -0.023 | 0.868   | 0.044                     | 0.751   | 0.173 | 0.463   |
| 03         | FCz  | 0.037                        | 0.977   | 0.050  | 0.989   | 0.046                     | 0.804   | 0.056 | 0.864   |
| 04         | Fp2  | 0.017                        | 1.000   | -0.010 | 0.940   | 0.124                     | 0.688   | 0.251 | 0.218   |
| 05         | Fz   | 0.056                        | 0.809   | -0.015 | 0.911   | 0.098                     | 0.626   | 0.189 | 0.555   |
| 06         | FC1  | -0.005                       | 0.993   | -0.029 | 0.954   | 0.045                     | 0.837   | 0.056 | 0.878   |
| 07         | AFz  | 0.095                        | 0.956   | -0.013 | 0.923   | 0.078                     | 0.798   | 0.188 | 0.559   |
| 08         | F1   | 0.012                        | 0.998   | -0.023 | 0.979   | 0.032                     | 0.817   | 0.178 | 0.524   |
| 09         | Fp1  | -0.078                       | 0.875   | 0.01   | 0.989   | 0.088                     | 0.762   | 0.233 | 0.293   |
| 10         | AF3  | -0.07                        | 0.983   | -0.012 | 0.982   | 0.014                     | 0.918   | 0.221 | 0.35    |
| 11         | F3   | -0.073                       | 0.773   | -0.134 | 0.527   | 0.024                     | 0.866   | 0.167 | 0.492   |
| 12         | F5   | -0.082                       | 0.964   | -0.095 | 0.854   | -0.015                    | 0.912   | 0.181 | 0.497   |
| 13         | FC5  | -0.054                       | 0.943   | -0.086 | 0.869   | 0.003                     | 0.983   | 0.149 | 0.497   |
| 14         | FC3  | -0.002                       | 0.987   | -0.065 | 0.951   | 0.05                      | 0.862   | 0.129 | 0.51    |
| 15         | C1   | 0.098                        | 0.804   | -0.004 | 0.98    | 0.004                     | 0.976   | 0.053 | 0.983   |
| 16         | F7   | 0.037                        | 0.97    | -0.132 | 0.48    | 0.044                     | 0.887   | 0.106 | 0.643   |
| 17         | FT7  | 0.008                        | 0.955   | -0.038 | 0.876   | -0.008                    | 0.99    | 0.125 | 0.681   |
| 18         | C3   | 0.104                        | 0.79    | 0.034  | 0.999   | 0.058                     | 0.815   | 0.143 | 0.653   |
| 19         | CP1  | 0.153                        | 0.74    | 0.047  | 0.972   | 0.006                     | 0.967   | 0.063 | 0.873   |
| 20         | C5   | 0.074                        | 0.696   | 0.029  | 0.984   | 0.068                     | 0.808   | 0.127 | 0.669   |
| 21         | T3   | 0.146                        | 0.78    | 0.005  | 0.998   | 0.069                     | 0.733   | 0.185 | 0.389   |
| 22         | TP7  | 0.101                        | 0.891   | 0.028  | 0.913   | 0.048                     | 0.964   | 0.12  | 0.633   |
| 23         | CP5  | 0.086                        | 0.745   | 0.039  | 0.991   | 0.084                     | 0.808   | 0.129 | 0.626   |
| 24         | P5   | 0.039                        | 0.946   | 0.025  | 0.996   | 0.079                     | 0.821   | 0.121 | 0.62    |
| 25         | P3   | 0.038                        | 0.955   | 0      | 0.998   | 0.104                     | 0.854   | 0.172 | 0.553   |
| 26         | A1   | 0.099                        | 0.703   | 0.034  | 0.873   | 0.077                     | 0.794   | 0.154 | 0.621   |
| 27         | T5   | 0.052                        | 0.986   | 0.027  | 0.948   | 0.064                     | 0.811   | 0.111 | 0.751   |
| 28         | P1   | -0.027                       | 0.989   | -0.021 | 0.974   | 0.096                     | 0.797   | 0.188 | 0.455   |
| 29         | P9   | 0.079                        | 0.934   | 0.057  | 0.967   | 0.059                     | 0.84    | 0.144 | 0.655   |

|    |     |        |       |        |       |        |       |       |       |
|----|-----|--------|-------|--------|-------|--------|-------|-------|-------|
| 30 | PO3 | -0.063 | 0.973 | -0.069 | 0.991 | 0.08   | 0.836 | 0.172 | 0.658 |
| 31 | Pz  | -0.053 | 0.986 | -0.054 | 0.896 | 0.06   | 0.899 | 0.16  | 0.773 |
| 32 | O1  | -0.106 | 0.893 | -0.016 | 0.997 | 0.065  | 0.811 | 0.17  | 0.638 |
| 33 | POz | -0.074 | 0.993 | -0.06  | 0.952 | 0.058  | 0.8   | 0.168 | 0.729 |
| 34 | Oz  | -0.088 | 0.858 | -0.041 | 0.914 | 0.075  | 0.725 | 0.19  | 0.547 |
| 35 | PO4 | -0.09  | 0.797 | -0.056 | 0.917 | 0.05   | 0.852 | 0.152 | 0.885 |
| 36 | O2  | -0.074 | 0.741 | -0.128 | 0.928 | 0.094  | 0.753 | 0.193 | 0.527 |
| 37 | P2  | -0.067 | 0.902 | -0.105 | 0.838 | 0.068  | 0.95  | 0.189 | 0.558 |
| 38 | CP2 | 0.01   | 0.983 | -0.062 | 0.987 | -0.056 | 0.816 | 0.052 | 0.947 |
| 39 | P4  | -0.043 | 0.952 | -0.124 | 0.91  | 0.074  | 0.858 | 0.187 | 0.427 |
| 40 | P10 | 0.024  | 0.978 | 0.019  | 0.931 | 0.075  | 0.766 | 0.158 | 0.421 |
| 41 | T6  | -0.016 | 0.974 | -0.129 | 0.854 | 0.053  | 0.833 | 0.151 | 0.46  |
| 42 | P6  | 0.018  | 0.955 | -0.114 | 0.895 | 0.052  | 0.922 | 0.161 | 0.4   |
| 43 | CP6 | 0.028  | 0.839 | -0.098 | 0.947 | 0.052  | 0.837 | 0.182 | 0.438 |
| 44 | A2  | 0.046  | 0.989 | 0.017  | 0.962 | 0.041  | 0.847 | 0.076 | 0.731 |
| 45 | TP8 | 0.062  | 0.923 | -0.083 | 0.984 | 0.04   | 0.836 | 0.163 | 0.438 |
| 46 | C6  | 0.068  | 0.933 | -0.087 | 0.993 | 0.019  | 0.905 | 0.146 | 0.474 |
| 47 | C4  | 0.058  | 0.927 | -0.031 | 0.998 | 0.006  | 0.968 | 0.103 | 0.647 |
| 48 | C2  | 0.076  | 0.93  | -0.07  | 0.988 | -0.018 | 0.997 | 0.061 | 0.857 |
| 49 | T4  | 0.137  | 0.872 | 0.012  | 0.929 | 0.169  | 0.578 | 0.127 | 0.52  |
| 50 | FC4 | 0      | 0.998 | -0.061 | 0.994 | 0.015  | 0.995 | 0.141 | 0.501 |
| 51 | FC2 | 0.009  | 0.996 | -0.05  | 0.919 | 0.021  | 0.966 | 0.048 | 0.76  |
| 52 | FT8 | 0.007  | 0.964 | -0.124 | 0.93  | 0.019  | 0.951 | 0.222 | 0.349 |
| 53 | FC6 | -0.025 | 0.941 | -0.079 | 0.896 | 0.018  | 0.902 | 0.196 | 0.44  |
| 54 | F8  | 0.167  | 0.759 | -0.039 | 0.941 | 0.094  | 0.814 | 0.181 | 0.414 |
| 55 | F6  | -0.006 | 0.99  | -0.093 | 0.778 | -0.003 | 0.98  | 0.218 | 0.362 |
| 56 | F4  | 0.028  | 0.986 | -0.14  | 0.612 | 0.103  | 0.854 | 0.218 | 0.323 |
| 57 | Cz  | 0.111  | 0.975 | 0.01   | 0.941 | 0.028  | 0.939 | 0.106 | 0.724 |

---

**Supplementary Table S20. Correlation analysis result of alpha absolute power and HF-HRV.**

|            |      | Group 1. Depressive disorder |         |       |         | Group 2. Anxiety disorder |         |        |         |
|------------|------|------------------------------|---------|-------|---------|---------------------------|---------|--------|---------|
| Electrodes |      | Resting                      |         | Task  |         | Resting                   |         | Task   |         |
| No.        | Name | r                            | p (FDR) | r     | p (FDR) | r                         | p (FDR) | r      | p (FDR) |
| 01         | AF4  | 0.075                        | 0.808   | 0.240 | 0.123   | -0.036                    | 0.975   | -0.239 | 0.356   |
| 02         | F2   | 0.147                        | 0.598   | 0.26  | 0.087   | -0.06                     | 0.863   | -0.206 | 0.437   |
| 03         | FCz  | 0.200                        | 0.361   | 0.237 | 0.171   | 0.073                     | 0.867   | -0.041 | 0.907   |
| 04         | Fp2  | 0.114                        | 0.722   | 0.178 | 0.311   | 0.004                     | 0.978   | -0.218 | 0.534   |
| 05         | Fz   | 0.147                        | 0.457   | 0.18  | 0.300   | -0.011                    | 0.969   | -0.207 | 0.405   |
| 06         | FC1  | 0.015                        | 0.935   | 0.104 | 0.603   | 0.123                     | 0.761   | -0.025 | 0.955   |
| 07         | AFz  | 0.144                        | 0.538   | 0.239 | 0.124   | -0.044                    | 0.964   | -0.217 | 0.376   |
| 08         | F1   | 0.153                        | 0.425   | 0.179 | 0.304   | 0.018                     | 0.941   | -0.166 | 0.600   |
| 09         | Fp1  | 0.122                        | 0.535   | 0.101 | 0.589   | 0.016                     | 0.909   | -0.231 | 0.36    |
| 10         | AF3  | 0.115                        | 0.577   | 0.178 | 0.309   | -0.044                    | 0.954   | -0.234 | 0.288   |
| 11         | F3   | 0.121                        | 0.540   | 0.188 | 0.240   | 0.056                     | 0.951   | -0.198 | 0.589   |
| 12         | F5   | 0.118                        | 0.558   | 0.212 | 0.191   | 0.071                     | 0.973   | -0.142 | 0.793   |
| 13         | FC5  | 0.165                        | 0.414   | 0.284 | 0.069   | 0.113                     | 0.813   | -0.095 | 0.969   |
| 14         | FC3  | 0.102                        | 0.804   | 0.238 | 0.144   | 0.123                     | 0.811   | -0.024 | 0.942   |
| 15         | C1   | -0.018                       | 0.942   | 0.119 | 0.683   | 0.189                     | 0.523   | 0.014  | 0.985   |
| 16         | F7   | 0.056                        | 0.741   | 0.102 | 0.658   | 0.236                     | 0.706   | -0.153 | 0.8     |
| 17         | FT7  | 0.113                        | 0.652   | 0.232 | 0.163   | 0.122                     | 0.876   | -0.093 | 0.921   |
| 18         | C3   | -0.042                       | 0.939   | 0.066 | 0.687   | 0.132                     | 0.786   | -0.027 | 0.973   |
| 19         | CP1  | -0.072                       | 0.737   | 0.032 | 0.896   | 0.2                       | 0.559   | 0.007  | 0.959   |
| 20         | C5   | 0.078                        | 0.738   | 0.207 | 0.330   | 0.129                     | 0.839   | -0.043 | 0.868   |
| 21         | T3   | 0.11                         | 0.607   | 0.071 | 0.870   | 0.257                     | 0.431   | -0.098 | 0.975   |
| 22         | TP7  | 0.072                        | 0.761   | 0.177 | 0.452   | 0.18                      | 0.721   | -0.056 | 0.929   |
| 23         | CP5  | 0.061                        | 0.707   | 0.177 | 0.401   | 0.199                     | 0.694   | -0.018 | 0.985   |
| 24         | P5   | 0.07                         | 0.661   | 0.181 | 0.330   | 0.23                      | 0.629   | -0.002 | 0.989   |
| 25         | P3   | 0.085                        | 0.577   | 0.191 | 0.332   | 0.126                     | 0.883   | -0.092 | 0.955   |
| 26         | A1   | 0.014                        | 0.921   | 0.076 | 0.823   | 0.298                     | 0.37    | 0.014  | 0.95    |
| 27         | T5   | 0.074                        | 0.694   | 0.122 | 0.505   | 0.182                     | 0.661   | -0.006 | 0.964   |
| 28         | P1   | 0.114                        | 0.579   | 0.15  | 0.439   | 0.048                     | 0.921   | -0.116 | 0.878   |
| 29         | P9   | 0.123                        | 0.477   | 0.193 | 0.287   | 0.224                     | 0.477   | 0.044  | 0.989   |

|    |     |        |       |       |       |        |       |        |       |
|----|-----|--------|-------|-------|-------|--------|-------|--------|-------|
| 30 | PO3 | 0.159  | 0.450 | 0.200 | 0.259 | 0.037  | 0.991 | -0.100 | 0.89  |
| 31 | Pz  | 0.081  | 0.864 | 0.127 | 0.577 | 0.09   | 0.977 | -0.101 | 0.953 |
| 32 | O1  | 0.185  | 0.374 | 0.214 | 0.209 | 0.101  | 0.851 | 0.011  | 0.939 |
| 33 | POz | 0.093  | 0.717 | 0.139 | 0.567 | 0.034  | 0.969 | -0.144 | 0.894 |
| 34 | Oz  | 0.124  | 0.673 | 0.142 | 0.547 | 0.071  | 0.93  | -0.089 | 0.814 |
| 35 | PO4 | 0.132  | 0.617 | 0.129 | 0.559 | 0.024  | 0.943 | -0.139 | 0.95  |
| 36 | O2  | 0.115  | 0.731 | 0.193 | 0.285 | 0.067  | 0.977 | -0.103 | 0.897 |
| 37 | P2  | 0.174  | 0.371 | 0.178 | 0.413 | -0.004 | 0.975 | -0.179 | 0.676 |
| 38 | CP2 | 0.187  | 0.433 | 0.215 | 0.363 | 0.251  | 0.418 | -0.027 | 0.964 |
| 39 | P4  | 0.200  | 0.257 | 0.277 | 0.082 | 0.095  | 0.963 | -0.141 | 0.736 |
| 40 | P10 | -0.015 | 0.914 | 0.039 | 0.873 | 0.191  | 0.67  | -0.018 | 0.998 |
| 41 | T6  | 0.144  | 0.472 | 0.247 | 0.174 | 0.233  | 0.422 | 0.015  | 0.917 |
| 42 | P6  | 0.101  | 0.694 | 0.196 | 0.273 | 0.203  | 0.615 | -0.001 | 0.994 |
| 43 | CP6 | 0.186  | 0.355 | 0.254 | 0.154 | 0.188  | 0.798 | -0.013 | 0.934 |
| 44 | A2  | -0.027 | 0.878 | 0.049 | 0.844 | 0.256  | 0.48  | 0.079  | 0.878 |
| 45 | TP8 | 0.101  | 0.748 | 0.167 | 0.353 | 0.166  | 0.796 | 0.021  | 0.912 |
| 46 | C6  | 0.136  | 0.580 | 0.187 | 0.432 | 0.145  | 0.785 | -0.031 | 0.989 |
| 47 | C4  | 0.125  | 0.670 | 0.224 | 0.252 | 0.159  | 0.786 | -0.047 | 0.986 |
| 48 | C2  | 0.035  | 0.846 | 0.09  | 0.847 | 0.074  | 0.848 | -0.088 | 0.839 |
| 49 | T4  | 0.068  | 0.671 | 0.157 | 0.462 | 0.224  | 0.574 | -0.115 | 0.928 |
| 50 | FC4 | 0.199  | 0.436 | 0.223 | 0.300 | 0.07   | 0.924 | -0.131 | 0.832 |
| 51 | FC2 | 0.093  | 0.806 | 0.114 | 0.748 | 0.029  | 0.986 | -0.096 | 0.988 |
| 52 | FT8 | 0.160  | 0.345 | 0.171 | 0.337 | 0.018  | 0.986 | -0.101 | 0.970 |
| 53 | FC6 | 0.211  | 0.307 | 0.262 | 0.095 | 0.039  | 0.974 | -0.143 | 0.793 |
| 54 | F8  | 0.044  | 0.907 | 0.124 | 0.523 | 0.172  | 0.769 | -0.123 | 0.854 |
| 55 | F6  | 0.14   | 0.44  | 0.194 | 0.245 | 0.006  | 0.99  | -0.178 | 0.829 |
| 56 | F4  | 0.045  | 0.963 | 0.144 | 0.446 | 0.059  | 0.894 | -0.195 | 0.607 |
| 57 | Cz  | 0.119  | 0.615 | 0.172 | 0.396 | 0.202  | 0.536 | -0.100 | 0.891 |

---



**Supplementary Table S21. Correlation analysis result of alpha relative power and HF-HRV.**

|            |      | Group 1. Depressive disorder |         |        |         | Group 2. Anxiety disorder |         |        |         |
|------------|------|------------------------------|---------|--------|---------|---------------------------|---------|--------|---------|
| Electrodes |      | Resting                      |         | Task   |         | Resting                   |         | Task   |         |
| No.        | Name | r                            | p (FDR) | r      | p (FDR) | r                         | p (FDR) | r      | p (FDR) |
| 01         | AF4  | 0.249                        | 0.308   | 0.043  | 0.951   | -0.001                    | 0.998   | -0.116 | 0.845   |
| 02         | F2   | 0.240                        | 0.396   | 0.056  | 0.906   | 0.021                     | 0.881   | -0.116 | 0.915   |
| 03         | FCz  | 0.159                        | 0.469   | 0.065  | 0.848   | 0.121                     | 0.828   | -0.094 | 0.968   |
| 04         | Fp2  | 0.204                        | 0.506   | -0.092 | 0.925   | -0.019                    | 0.894   | -0.154 | 0.974   |
| 05         | Fz   | 0.167                        | 0.619   | -0.065 | 0.994   | -0.023                    | 0.946   | -0.157 | 0.866   |
| 06         | FC1  | 0.148                        | 0.647   | 0.039  | 0.919   | 0.125                     | 0.686   | -0.092 | 0.970   |
| 07         | AFz  | 0.209                        | 0.394   | -0.051 | 0.898   | 0.000                     | 0.998   | -0.181 | 0.787   |
| 08         | F1   | 0.210                        | 0.503   | 0.010  | 0.942   | 0.000                     | 0.999   | -0.140 | 0.817   |
| 09         | Fp1  | 0.192                        | 0.624   | -0.104 | 0.833   | -0.001                    | 0.994   | -0.183 | 0.604   |
| 10         | AF3  | 0.176                        | 0.622   | -0.032 | 0.884   | -0.023                    | 0.908   | -0.156 | 0.808   |
| 11         | F3   | 0.145                        | 0.670   | 0.033  | 0.925   | 0.036                     | 0.913   | -0.092 | 0.933   |
| 12         | F5   | 0.177                        | 0.497   | 0.077  | 0.747   | 0.019                     | 0.963   | -0.109 | 0.711   |
| 13         | FC5  | 0.192                        | 0.507   | 0.103  | 0.827   | 0.080                     | 0.674   | -0.092 | 0.743   |
| 14         | FC3  | 0.233                        | 0.393   | 0.073  | 0.774   | 0.131                     | 0.47    | -0.140 | 0.603   |
| 15         | C1   | 0.085                        | 0.800   | -0.010 | 0.943   | 0.189                     | 0.539   | -0.067 | 0.833   |
| 16         | F7   | 0.097                        | 0.773   | 0.063  | 0.833   | 0.160                     | 0.778   | -0.036 | 0.86    |
| 17         | FT7  | 0.192                        | 0.401   | 0.123  | 0.531   | 0.085                     | 0.753   | -0.105 | 0.821   |
| 18         | C3   | 0.109                        | 0.690   | -0.048 | 0.784   | 0.148                     | 0.564   | -0.110 | 0.933   |
| 19         | CP1  | 0.053                        | 0.867   | -0.067 | 0.752   | 0.183                     | 0.599   | -0.062 | 0.975   |
| 20         | C5   | 0.210                        | 0.449   | 0.030  | 0.825   | 0.179                     | 0.498   | -0.167 | 0.773   |
| 21         | T3   | 0.106                        | 0.979   | 0.066  | 0.804   | 0.209                     | 0.421   | -0.047 | 0.94    |
| 22         | TP7  | 0.243                        | 0.37    | 0.056  | 0.766   | 0.195                     | 0.513   | -0.134 | 0.999   |
| 23         | CP5  | 0.228                        | 0.418   | 0.005  | 0.969   | 0.196                     | 0.505   | -0.117 | 0.931   |
| 24         | P5   | 0.205                        | 0.534   | 0.045  | 0.837   | 0.166                     | 0.739   | -0.076 | 0.886   |
| 25         | P3   | 0.206                        | 0.437   | 0.061  | 0.862   | 0.069                     | 0.93    | -0.173 | 0.985   |
| 26         | A1   | 0.152                        | 0.85    | 0.027  | 0.985   | 0.265                     | 0.172   | -0.021 | 0.954   |
| 27         | T5   | 0.196                        | 0.611   | 0.122  | 0.604   | 0.169                     | 0.528   | -0.047 | 0.965   |
| 28         | P1   | 0.18                         | 0.429   | 0.105  | 0.72    | 0.071                     | 0.879   | -0.146 | 0.802   |
| 29         | P9   | 0.205                        | 0.656   | 0.066  | 0.816   | 0.177                     | 0.565   | -0.097 | 0.865   |

|    |     |       |       |        |       |       |       |        |       |
|----|-----|-------|-------|--------|-------|-------|-------|--------|-------|
| 30 | PO3 | 0.196 | 0.362 | 0.107  | 0.806 | 0.103 | 0.804 | -0.109 | 0.84  |
| 31 | Pz  | 0.153 | 0.558 | 0.071  | 0.917 | 0.141 | 0.754 | -0.093 | 0.849 |
| 32 | O1  | 0.24  | 0.378 | 0.232  | 0.159 | 0.103 | 0.72  | -0.119 | 0.835 |
| 33 | POz | 0.163 | 0.425 | 0.088  | 0.831 | 0.14  | 0.7   | -0.126 | 0.899 |
| 34 | Oz  | 0.198 | 0.442 | 0.192  | 0.304 | 0.111 | 0.719 | -0.157 | 0.773 |
| 35 | PO4 | 0.166 | 0.566 | 0.108  | 0.703 | 0.122 | 0.75  | -0.15  | 0.799 |
| 36 | O2  | 0.205 | 0.527 | 0.191  | 0.300 | 0.107 | 0.725 | -0.162 | 0.874 |
| 37 | P2  | 0.231 | 0.46  | 0.157  | 0.459 | 0.086 | 0.833 | -0.158 | 0.708 |
| 38 | CP2 | 0.236 | 0.349 | 0.135  | 0.599 | 0.264 | 0.175 | -0.063 | 0.75  |
| 39 | P4  | 0.259 | 0.233 | 0.16   | 0.443 | 0.114 | 0.732 | -0.144 | 0.775 |
| 40 | P10 | 0.097 | 0.942 | -0.03  | 0.895 | 0.186 | 0.522 | -0.064 | 0.916 |
| 41 | T6  | 0.155 | 0.65  | 0.091  | 0.937 | 0.204 | 0.452 | -0.023 | 0.935 |
| 42 | P6  | 0.150 | 0.778 | 0.035  | 0.876 | 0.21  | 0.417 | -0.062 | 0.856 |
| 43 | CP6 | 0.192 | 0.629 | 0.069  | 0.812 | 0.176 | 0.661 | -0.103 | 0.83  |
| 44 | A2  | 0.024 | 0.943 | -0.045 | 0.743 | 0.248 | 0.249 | 0.007  | 0.963 |
| 45 | TP8 | 0.107 | 0.864 | 0.002  | 0.990 | 0.205 | 0.452 | -0.007 | 0.974 |
| 46 | C6  | 0.188 | 0.718 | -0.034 | 0.805 | 0.186 | 0.485 | -0.011 | 0.937 |
| 47 | C4  | 0.217 | 0.505 | 0.054  | 0.900 | 0.202 | 0.383 | -0.031 | 0.922 |
| 48 | C2  | 0.183 | 0.56  | 0.065  | 0.919 | 0.175 | 0.532 | -0.064 | 0.842 |
| 49 | T4  | 0.012 | 0.928 | -0.03  | 0.977 | 0.128 | 0.575 | -0.019 | 0.966 |
| 50 | FC4 | 0.271 | 0.332 | 0.068  | 0.904 | 0.149 | 0.522 | -0.083 | 0.814 |
| 51 | FC2 | 0.169 | 0.554 | 0.073  | 0.882 | 0.163 | 0.52  | -0.03  | 0.896 |
| 52 | FT8 | 0.212 | 0.302 | 0.074  | 0.702 | 0.001 | 0.996 | -0.088 | 0.889 |
| 53 | FC6 | 0.26  | 0.284 | 0.075  | 0.801 | 0.043 | 0.977 | -0.105 | 0.728 |
| 54 | F8  | 0.025 | 0.931 | -0.034 | 0.822 | 0.102 | 0.944 | -0.011 | 0.937 |
| 55 | F6  | 0.227 | 0.285 | 0.071  | 0.798 | 0.019 | 0.988 | -0.081 | 0.879 |
| 56 | F4  | 0.111 | 0.684 | -0.014 | 0.990 | 0.01  | 0.995 | -0.088 | 0.933 |
| 57 | Cz  | 0.052 | 0.894 | -0.005 | 0.974 | 0.18  | 0.498 | -0.059 | 0.783 |

---

**Supplementary Table S22. Correlation analysis result of beta absolute power and HF-HRV.**

|            |      | Group 1. Depressive disorder |         |        |         | Group 2. Anxiety disorder |         |        |         |
|------------|------|------------------------------|---------|--------|---------|---------------------------|---------|--------|---------|
| Electrodes |      | Resting                      |         | Task   |         | Resting                   |         | Task   |         |
| No.        | Name | r                            | p (FDR) | r      | p (FDR) | r                         | p (FDR) | r      | p (FDR) |
| 01         | AF4  | -0.155                       | 0.541   | 0.089  | 0.654   | 0.012                     | 0.988   | -0.191 | 0.54    |
| 02         | F2   | -0.124                       | 0.550   | 0.140  | 0.467   | -0.022                    | 0.874   | -0.090 | 0.821   |
| 03         | FCz  | 0.023                        | 0.917   | 0.134  | 0.624   | 0.145                     | 0.645   | 0.085  | 0.897   |
| 04         | Fp2  | -0.095                       | 0.786   | 0.127  | 0.571   | 0.025                     | 0.897   | -0.132 | 0.776   |
| 05         | Fz   | -0.072                       | 0.884   | 0.087  | 0.708   | -0.023                    | 0.997   | -0.172 | 0.562   |
| 06         | FC1  | -0.163                       | 0.756   | 0.009  | 0.946   | 0.180                     | 0.485   | 0.109  | 0.863   |
| 07         | AFz  | -0.106                       | 0.627   | 0.111  | 0.599   | 0.025                     | 0.928   | -0.114 | 0.779   |
| 08         | F1   | -0.097                       | 0.934   | 0.032  | 0.848   | 0.085                     | 0.897   | -0.056 | 0.814   |
| 09         | Fp1  | -0.066                       | 0.894   | 0.038  | 0.844   | 0.024                     | 0.864   | -0.134 | 0.736   |
| 10         | AF3  | -0.116                       | 0.933   | 0.021  | 0.894   | -0.048                    | 0.949   | -0.180 | 0.625   |
| 11         | F3   | -0.092                       | 0.931   | 0.087  | 0.757   | -0.007                    | 0.963   | -0.147 | 0.853   |
| 12         | F5   | -0.161                       | 0.833   | 0.042  | 0.905   | 0.078                     | 0.916   | -0.074 | 0.804   |
| 13         | FC5  | -0.132                       | 0.733   | 0.141  | 0.542   | 0.108                     | 0.818   | -0.040 | 0.842   |
| 14         | FC3  | -0.2                         | 0.607   | 0.076  | 0.809   | 0.121                     | 0.778   | 0.064  | 0.917   |
| 15         | C1   | -0.178                       | 0.612   | 0.019  | 0.969   | 0.152                     | 0.614   | 0.033  | 0.969   |
| 16         | F7   | -0.088                       | 0.904   | -0.048 | 0.895   | 0.164                     | 0.667   | -0.117 | 0.828   |
| 17         | FT7  | -0.192                       | 0.754   | 0.022  | 0.894   | 0.106                     | 0.820   | -0.023 | 0.94    |
| 18         | C3   | -0.247                       | 0.290   | -0.038 | 0.950   | 0.120                     | 0.86    | 0.024  | 0.998   |
| 19         | CP1  | -0.191                       | 0.517   | -0.002 | 0.991   | 0.167                     | 0.62    | 0.019  | 0.939   |
| 20         | C5   | -0.189                       | 0.659   | 0.015  | 0.98    | 0.099                     | 0.937   | 0.051  | 0.923   |
| 21         | T3   | 0.032                        | 0.841   | 0.022  | 0.942   | 0.176                     | 0.525   | -0.087 | 0.936   |
| 22         | TP7  | -0.204                       | 0.569   | -0.049 | 0.998   | 0.107                     | 0.853   | 0.02   | 0.984   |
| 23         | CP5  | -0.204                       | 0.425   | -0.013 | 0.923   | 0.115                     | 0.873   | 0.072  | 0.907   |
| 24         | P5   | -0.166                       | 0.875   | 0.015  | 0.989   | 0.156                     | 0.759   | 0.061  | 0.982   |
| 25         | P3   | -0.177                       | 0.581   | 0.033  | 0.975   | 0.134                     | 0.754   | 0.04   | 0.873   |
| 26         | A1   | -0.201                       | 0.446   | -0.091 | 0.858   | 0.151                     | 0.77    | -0.087 | 0.981   |
| 27         | T5   | -0.194                       | 0.655   | -0.118 | 0.829   | 0.129                     | 0.707   | -0.004 | 0.977   |
| 28         | P1   | -0.095                       | 0.739   | 0.039  | 0.931   | 0.111                     | 0.674   | -0.037 | 0.968   |
| 29         | P9   | -0.066                       | 0.969   | 0.051  | 0.995   | 0.133                     | 0.731   | 0.022  | 0.978   |

|    |     |        |       |        |       |       |       |        |       |
|----|-----|--------|-------|--------|-------|-------|-------|--------|-------|
| 30 | PO3 | -0.1   | 0.67  | 0.11   | 0.762 | 0.122 | 0.638 | -0.053 | 0.845 |
| 31 | Pz  | -0.161 | 0.648 | 0.029  | 0.837 | 0.164 | 0.535 | -0.073 | 0.991 |
| 32 | O1  | -0.016 | 0.98  | 0.076  | 0.753 | 0.168 | 0.719 | 0.113  | 0.769 |
| 33 | POz | -0.154 | 0.567 | 0.026  | 0.85  | 0.116 | 0.687 | -0.083 | 0.996 |
| 34 | Oz  | -0.106 | 0.973 | -0.048 | 0.917 | 0.15  | 0.521 | 0.038  | 0.998 |
| 35 | PO4 | -0.087 | 0.931 | 0.002  | 0.989 | 0.102 | 0.75  | -0.046 | 0.985 |
| 36 | O2  | -0.115 | 0.875 | 0.108  | 0.796 | 0.137 | 0.694 | 0.01   | 0.996 |
| 37 | P2  | -0.054 | 0.85  | 0.073  | 0.995 | 0.1   | 0.873 | -0.036 | 0.998 |
| 38 | CP2 | -0.02  | 0.915 | 0.096  | 0.815 | 0.196 | 0.472 | 0.023  | 1     |
| 39 | P4  | -0.074 | 0.652 | 0.173  | 0.492 | 0.116 | 0.849 | -0.033 | 0.989 |
| 40 | P10 | -0.166 | 0.96  | -0.02  | 0.982 | 0.177 | 0.67  | 0.024  | 0.983 |
| 41 | T6  | -0.07  | 0.862 | 0.186  | 0.451 | 0.214 | 0.653 | 0.068  | 0.81  |
| 42 | P6  | -0.1   | 0.96  | 0.118  | 0.637 | 0.19  | 0.69  | 0.075  | 0.982 |
| 43 | CP6 | -0.033 | 0.99  | 0.127  | 0.782 | 0.168 | 0.774 | 0.055  | 0.962 |
| 44 | A2  | -0.106 | 0.895 | 0.000  | 0.999 | 0.235 | 0.361 | 0.103  | 0.98  |
| 45 | TP8 | -0.059 | 0.991 | 0.082  | 0.749 | 0.136 | 0.852 | 0.042  | 0.968 |
| 46 | C6  | -0.039 | 0.964 | 0.114  | 0.798 | 0.11  | 0.893 | 0.001  | 0.997 |
| 47 | C4  | -0.081 | 0.907 | 0.127  | 0.714 | 0.132 | 0.886 | 0.026  | 0.922 |
| 48 | C2  | -0.137 | 0.954 | -0.05  | 0.938 | 0.107 | 0.718 | -0.005 | 0.971 |
| 49 | T4  | -0.02  | 0.954 | 0.096  | 0.895 | 0.194 | 0.524 | -0.095 | 0.899 |
| 50 | FC4 | -0.041 | 0.999 | 0.119  | 0.627 | 0.091 | 0.947 | -0.021 | 0.994 |
| 51 | FC2 | -0.074 | 0.89  | -0.007 | 0.98  | 0.07  | 0.921 | -0.016 | 0.935 |
| 52 | FT8 | -0.111 | 0.996 | 0.015  | 0.928 | 0.097 | 0.91  | -0.01  | 0.987 |
| 53 | FC6 | -0.117 | 0.953 | 0.13   | 0.611 | 0.084 | 0.849 | -0.031 | 0.972 |
| 54 | F8  | -0.051 | 0.998 | 0.092  | 0.754 | 0.123 | 0.816 | -0.091 | 0.964 |
| 55 | F6  | -0.146 | 0.793 | 0.032  | 0.943 | 0.041 | 0.907 | -0.1   | 0.977 |
| 56 | F4  | -0.147 | 0.942 | 0.083  | 0.641 | 0.005 | 0.987 | -0.174 | 0.712 |
| 57 | Cz  | -0.01  | 0.943 | 0.091  | 0.840 | 0.193 | 0.602 | -0.064 | 0.968 |

---

**Supplementary Table S23. Correlation analysis result of beta relative power and HF-HRV.**

|            |      | Group 1. Depressive disorder |         |        |               | Group 2. Anxiety disorder |         |        |         |
|------------|------|------------------------------|---------|--------|---------------|---------------------------|---------|--------|---------|
| Electrodes |      | Resting                      |         | Task   |               | Resting                   |         | Task   |         |
| No.        | Name | r                            | p (FDR) | r      | p (FDR)       | r                         | p (FDR) | r      | p (FDR) |
| 01         | AF4  | -0.148                       | 0.647   | -0.406 | <b>0.025*</b> | -0.057                    | 0.862   | -0.049 | 0.854   |
| 02         | F2   | -0.158                       | 0.611   | -0.423 | <b>0.015*</b> | 0.013                     | 0.924   | 0.014  | 0.922   |
| 03         | FCz  | -0.152                       | 0.479   | -0.286 | 0.119         | 0.021                     | 0.96    | -0.022 | 0.924   |
| 04         | Fp2  | -0.148                       | 0.563   | -0.346 | 0.116         | -0.092                    | 0.827   | 0.117  | 0.703   |
| 05         | Fz   | -0.151                       | 0.703   | -0.29  | 0.247         | -0.05                     | 0.849   | -0.113 | 0.77    |
| 06         | FC1  | -0.108                       | 0.620   | -0.238 | 0.265         | 0.041                     | 0.991   | 0.047  | 0.939   |
| 07         | AFz  | -0.218                       | 0.341   | -0.46  | <b>0.005*</b> | -0.024                    | 0.903   | -0.09  | 0.762   |
| 08         | F1   | -0.166                       | 0.474   | -0.379 | <b>0.026*</b> | 0.011                     | 0.952   | 0.005  | 0.973   |
| 09         | Fp1  | -0.141                       | 0.655   | -0.348 | 0.064         | -0.104                    | 0.730   | 0.118  | 0.744   |
| 10         | AF3  | -0.162                       | 0.503   | -0.423 | <b>0.010*</b> | -0.068                    | 0.752   | -0.066 | 0.843   |
| 11         | F3   | -0.145                       | 0.648   | -0.248 | 0.214         | -0.077                    | 0.754   | 0.068  | 0.93    |
| 12         | F5   | -0.175                       | 0.42    | -0.342 | 0.072         | -0.071                    | 0.865   | 0.006  | 0.968   |
| 13         | FC5  | -0.1800                      | 0.399   | -0.324 | 0.097         | -0.044                    | 0.753   | 0.024  | 0.942   |
| 14         | FC3  | -0.193                       | 0.334   | -0.334 | 0.051         | 0.000                     | 0.998   | 0.006  | 0.966   |
| 15         | C1   | -0.124                       | 0.526   | -0.245 | 0.178         | 0.043                     | 0.962   | 0.041  | 0.909   |
| 16         | F7   | -0.209                       | 0.277   | -0.313 | 0.162         | -0.069                    | 0.763   | 0.091  | 0.834   |
| 17         | FT7  | -0.208                       | 0.252   | -0.326 | 0.125         | -0.076                    | 0.873   | 0.013  | 0.972   |
| 18         | C3   | -0.182                       | 0.263   | -0.313 | <b>0.049*</b> | 0.028                     | 0.969   | 0.034  | 0.972   |
| 19         | CP1  | -0.140                       | 0.550   | -0.233 | 0.218         | 0.064                     | 0.789   | 0.007  | 0.961   |
| 20         | C5   | -0.227                       | 0.171   | -0.351 | <b>0.028*</b> | 0.024                     | 0.983   | 0.040  | 0.985   |
| 21         | T3   | -0.182                       | 0.417   | -0.14  | 0.624         | 0.001                     | 0.993   | -0.054 | 0.828   |
| 22         | TP7  | -0.23                        | 0.164   | -0.373 | <b>0.028*</b> | -0.041                    | 0.831   | 0.010  | 0.961   |
| 23         | CP5  | -0.229                       | 0.165   | -0.36  | <b>0.021*</b> | -0.028                    | 0.961   | 0.043  | 0.935   |
| 24         | P5   | -0.207                       | 0.205   | -0.373 | <b>0.018*</b> | -0.082                    | 0.74    | -0.002 | 0.987   |
| 25         | P3   | -0.209                       | 0.255   | -0.324 | <b>0.048*</b> | -0.014                    | 0.971   | 0.085  | 0.963   |
| 26         | A1   | -0.201                       | 0.225   | -0.328 | <b>0.046*</b> | -0.119                    | 0.953   | -0.095 | 0.891   |
| 27         | T5   | -0.18                        | 0.343   | -0.322 | 0.067         | -0.117                    | 0.844   | -0.065 | 0.863   |
| 28         | P1   | -0.201                       | 0.255   | -0.292 | 0.080         | 0.011                     | 0.939   | 0.054  | 0.966   |
| 29         | P9   | -0.197                       | 0.272   | -0.33  | 0.054         | -0.099                    | 0.778   | -0.116 | 0.893   |

|    |     |        |       |        |               |        |       |        |       |
|----|-----|--------|-------|--------|---------------|--------|-------|--------|-------|
| 30 | PO3 | -0.219 | 0.218 | -0.327 | 0.057         | 0.02   | 0.908 | 0      | 0.998 |
| 31 | Pz  | -0.254 | 0.185 | -0.337 | 0.053         | 0.046  | 0.876 | 0.04   | 0.971 |
| 32 | O1  | -0.237 | 0.17  | -0.349 | <b>0.025*</b> | -0.047 | 0.844 | 0      | 0.998 |
| 33 | POz | -0.22  | 0.225 | -0.361 | <b>0.035*</b> | 0.001  | 0.992 | -0.023 | 0.95  |
| 34 | Oz  | -0.206 | 0.265 | -0.306 | 0.056         | -0.07  | 0.837 | -0.043 | 0.939 |
| 35 | PO4 | -0.237 | 0.229 | -0.342 | <b>0.032*</b> | 0.011  | 0.941 | -0.02  | 0.925 |
| 36 | O2  | -0.218 | 0.231 | -0.312 | 0.050         | -0.056 | 0.868 | -0.068 | 0.979 |
| 37 | P2  | -0.223 | 0.199 | -0.332 | <b>0.032*</b> | 0.008  | 0.952 | 0.035  | 0.955 |
| 38 | CP2 | -0.181 | 0.375 | -0.314 | 0.052         | -0.012 | 0.934 | -0.039 | 0.957 |
| 39 | P4  | -0.162 | 0.434 | -0.324 | <b>0.041*</b> | -0.006 | 0.965 | 0.004  | 0.977 |
| 40 | P10 | -0.062 | 0.903 | -0.252 | 0.160         | -0.066 | 0.814 | -0.029 | 0.955 |
| 41 | T6  | -0.103 | 0.731 | -0.298 | 0.121         | -0.113 | 0.901 | -0.026 | 0.977 |
| 42 | P6  | -0.096 | 0.776 | -0.3   | 0.065         | -0.041 | 0.918 | -0.042 | 0.883 |
| 43 | CP6 | -0.12  | 0.618 | -0.277 | 0.102         | -0.022 | 0.948 | -0.02  | 0.988 |
| 44 | A2  | -0.034 | 0.915 | -0.245 | 0.191         | -0.139 | 0.961 | -0.082 | 0.944 |
| 45 | TP8 | -0.072 | 0.866 | -0.216 | 0.287         | -0.037 | 0.897 | -0.027 | 0.923 |
| 46 | C6  | -0.088 | 0.751 | -0.241 | 0.177         | -0.028 | 0.841 | -0.003 | 0.984 |
| 47 | C4  | -0.087 | 0.786 | -0.213 | 0.330         | -0.007 | 0.962 | 0.047  | 0.983 |
| 48 | C2  | -0.092 | 0.694 | -0.246 | 0.291         | 0.003  | 0.985 | -0.026 | 0.902 |
| 49 | T4  | -0.186 | 0.499 | -0.31  | 0.085         | -0.217 | 0.375 | 0.002  | 0.986 |
| 50 | FC4 | -0.095 | 0.738 | -0.237 | 0.243         | 0.028  | 0.97  | 0.026  | 0.956 |
| 51 | FC2 | -0.089 | 0.666 | -0.205 | 0.336         | 0.013  | 0.924 | -0.032 | 0.82  |
| 52 | FT8 | -0.142 | 0.5   | -0.227 | 0.325         | -0.032 | 0.901 | 0.005  | 0.973 |
| 53 | FC6 | -0.142 | 0.558 | -0.302 | 0.154         | -0.003 | 0.982 | 0.037  | 0.974 |
| 54 | F8  | -0.222 | 0.187 | -0.281 | 0.330         | -0.09  | 0.862 | 0.164  | 0.63  |
| 55 | F6  | -0.122 | 0.602 | -0.297 | 0.171         | -0.043 | 0.887 | 0.022  | 0.966 |
| 56 | F4  | -0.15  | 0.638 | -0.245 | 0.531         | -0.079 | 0.784 | -0.004 | 0.975 |
| 57 | Cz  | -0.145 | 0.466 | -0.266 | 0.123         | 0.013  | 0.926 | -0.032 | 0.965 |

**Supplementary Table S24. Correlation analysis result of gamma absolute power and HF-HRV.**

|            |      | Group 1. Depressive disorder |         |        |         | Group 2. Anxiety disorder |         |        |         |
|------------|------|------------------------------|---------|--------|---------|---------------------------|---------|--------|---------|
| Electrodes |      | Resting                      |         | Task   |         | Resting                   |         | Task   |         |
| No.        | Name | r                            | p (FDR) | r      | p (FDR) | r                         | p (FDR) | r      | p (FDR) |
| 01         | AF4  | -0.132                       | 0.481   | 0.245  | 0.180   | -0.073                    | 0.804   | -0.231 | 0.318   |
| 02         | F2   | -0.115                       | 0.575   | 0.275  | 0.169   | -0.133                    | 0.592   | -0.127 | 0.599   |
| 03         | FCz  | 0.053                        | 0.776   | 0.169  | 0.544   | 0.072                     | 0.783   | 0.059  | 0.885   |
| 04         | Fp2  | -0.086                       | 0.766   | 0.167  | 0.441   | -0.015                    | 0.97    | -0.135 | 0.787   |
| 05         | Fz   | -0.048                       | 0.981   | 0.118  | 0.505   | -0.033                    | 0.813   | -0.128 | 0.787   |
| 06         | FC1  | -0.153                       | 0.421   | 0.108  | 0.868   | 0.144                     | 0.664   | 0.083  | 0.867   |
| 07         | AFz  | -0.08                        | 0.804   | 0.240  | 0.244   | -0.002                    | 0.987   | -0.093 | 0.656   |
| 08         | F1   | -0.048                       | 0.858   | 0.102  | 0.843   | 0.067                     | 0.868   | -0.138 | 0.594   |
| 09         | Fp1  | 0.046                        | 0.858   | 0.047  | 0.791   | -0.022                    | 0.889   | -0.149 | 0.76    |
| 10         | AF3  | -0.022                       | 0.970   | 0.134  | 0.528   | -0.13                     | 0.898   | -0.235 | 0.38    |
| 11         | F3   | -0.045                       | 0.858   | 0.112  | 0.741   | -0.072                    | 0.978   | -0.15  | 0.785   |
| 12         | F5   | -0.103                       | 0.649   | 0.085  | 0.794   | 0.057                     | 0.92    | -0.161 | 0.523   |
| 13         | FC5  | -0.065                       | 0.749   | 0.190  | 0.393   | 0.075                     | 0.956   | -0.172 | 0.596   |
| 14         | FC3  | -0.138                       | 0.448   | 0.214  | 0.365   | 0.04                      | 0.976   | 0.085  | 0.903   |
| 15         | C1   | -0.129                       | 0.497   | 0.105  | 0.883   | 0.13                      | 0.615   | -0.016 | 0.94    |
| 16         | F7   | -0.073                       | 0.891   | 0.002  | 0.991   | 0.091                     | 0.919   | -0.141 | 0.839   |
| 17         | FT7  | -0.14                        | 0.438   | 0.081  | 0.804   | 0.048                     | 0.938   | -0.097 | 0.725   |
| 18         | C3   | -0.185                       | 0.314   | 0.062  | 0.880   | -0.013                    | 0.923   | -0.019 | 0.922   |
| 19         | CP1  | -0.146                       | 0.409   | 0.146  | 0.525   | 0.037                     | 0.965   | -0.05  | 0.963   |
| 20         | C5   | -0.144                       | 0.506   | 0.083  | 0.748   | -0.112                    | 0.683   | 0.042  | 0.999   |
| 21         | T3   | 0.009                        | 0.984   | 0.006  | 0.967   | 0.075                     | 0.963   | -0.129 | 0.908   |
| 22         | TP7  | -0.185                       | 0.45    | -0.026 | 0.991   | -0.066                    | 0.829   | -0.007 | 0.972   |
| 23         | CP5  | -0.168                       | 0.465   | 0.076  | 0.755   | -0.06                     | 0.864   | 0.085  | 0.842   |
| 24         | P5   | -0.155                       | 0.42    | 0.078  | 0.771   | 0.051                     | 0.942   | -0.028 | 0.982   |
| 25         | P3   | -0.143                       | 0.383   | 0.121  | 0.539   | 0.067                     | 0.925   | -0.002 | 0.989   |
| 26         | A1   | -0.214                       | 0.294   | -0.098 | 0.881   | 0.058                     | 0.949   | -0.219 | 0.393   |
| 27         | T5   | -0.223                       | 0.213   | -0.247 | 0.49    | 0.039                     | 0.846   | -0.084 | 0.849   |
| 28         | P1   | -0.084                       | 0.634   | 0.097  | 0.927   | 0.079                     | 0.954   | -0.102 | 0.938   |
| 29         | P9   | -0.117                       | 0.593   | 0.01   | 0.944   | 0.112                     | 0.782   | -0.023 | 0.999   |

|    |     |        |       |        |       |        |       |        |       |
|----|-----|--------|-------|--------|-------|--------|-------|--------|-------|
| 30 | PO3 | -0.115 | 0.575 | 0.184  | 0.571 | 0.075  | 0.763 | -0.098 | 0.865 |
| 31 | Pz  | -0.127 | 0.506 | 0.06   | 0.798 | 0.036  | 0.862 | -0.111 | 0.836 |
| 32 | O1  | -0.054 | 0.751 | -0.069 | 0.845 | 0.259  | 0.521 | 0.061  | 0.91  |
| 33 | POz | -0.134 | 0.471 | 0.029  | 0.903 | 0.044  | 0.89  | -0.11  | 0.929 |
| 34 | Oz  | -0.134 | 0.422 | -0.207 | 0.693 | 0.15   | 0.613 | 0.072  | 0.971 |
| 35 | PO4 | -0.077 | 0.746 | -0.019 | 0.997 | -0.002 | 0.99  | -0.101 | 0.859 |
| 36 | O2  | -0.129 | 0.638 | 0.1    | 0.69  | 0.107  | 0.636 | 0.018  | 0.953 |
| 37 | P2  | -0.083 | 0.642 | 0.096  | 0.858 | -0.008 | 0.964 | -0.088 | 0.875 |
| 38 | CP2 | -0.045 | 0.803 | 0.152  | 0.78  | 0.208  | 0.553 | 0.113  | 0.999 |
| 39 | P4  | -0.096 | 0.568 | 0.154  | 0.595 | 0.017  | 0.949 | -0.113 | 0.978 |
| 40 | P10 | -0.134 | 0.468 | -0.123 | 0.859 | 0.044  | 0.925 | -0.144 | 0.632 |
| 41 | T6  | -0.045 | 0.744 | 0.182  | 0.431 | 0.096  | 0.906 | -0.066 | 0.796 |
| 42 | P6  | -0.127 | 0.469 | 0.147  | 0.752 | 0.124  | 0.971 | -0.050 | 0.914 |
| 43 | CP6 | 0.000  | 1.000 | 0.131  | 0.73  | 0.051  | 0.928 | -0.067 | 0.985 |
| 44 | A2  | 0.016  | 0.908 | 0.048  | 0.908 | 0.083  | 0.999 | -0.017 | 0.932 |
| 45 | TP8 | -0.013 | 0.938 | 0.141  | 0.653 | -0.036 | 0.961 | -0.087 | 0.867 |
| 46 | C6  | -0.024 | 0.859 | 0.269  | 0.239 | -0.033 | 0.946 | -0.143 | 0.934 |
| 47 | C4  | -0.07  | 0.656 | 0.215  | 0.422 | -0.019 | 0.928 | -0.075 | 0.975 |
| 48 | C2  | -0.169 | 0.306 | -0.056 | 0.928 | 0.065  | 0.87  | 0.001  | 0.995 |
| 49 | T4  | 0.106  | 0.827 | 0.129  | 0.795 | 0.173  | 0.678 | -0.166 | 0.829 |
| 50 | FC4 | -0.033 | 0.81  | 0.242  | 0.266 | 0.01   | 0.969 | -0.098 | 0.954 |
| 51 | FC2 | -0.032 | 0.885 | -0.01  | 0.978 | -0.034 | 0.948 | -0.028 | 0.955 |
| 52 | FT8 | -0.094 | 0.578 | 0.054  | 0.886 | -0.01  | 0.942 | -0.107 | 0.679 |
| 53 | FC6 | -0.083 | 0.588 | 0.251  | 0.424 | -0.025 | 0.856 | -0.109 | 0.862 |
| 54 | F8  | -0.04  | 0.778 | 0.151  | 0.737 | 0.048  | 0.874 | -0.133 | 0.913 |
| 55 | F6  | -0.121 | 0.514 | 0.124  | 0.675 | -0.066 | 0.831 | -0.154 | 0.602 |
| 56 | F4  | -0.094 | 0.712 | 0.196  | 0.345 | -0.024 | 0.916 | -0.145 | 0.811 |
| 57 | Cz  | -0.009 | 0.95  | 0.112  | 0.826 | 0.131  | 0.842 | -0.104 | 0.829 |

---



**Supplementary Table S25. Correlation analysis result of gamma relative power and HF-HRV.**

|            |      | Group 1. Depressive disorder |         |        |         | Group 2. Anxiety disorder |         |        |         |
|------------|------|------------------------------|---------|--------|---------|---------------------------|---------|--------|---------|
| Electrodes |      | Resting                      |         | Task   |         | Resting                   |         | Task   |         |
| No.        | Name | r                            | p (FDR) | r      | p (FDR) | r                         | p (FDR) | r      | p (FDR) |
| 01         | AF4  | -0.132                       | 0.440   | -0.142 | 0.551   | -0.061                    | 0.932   | -0.053 | 0.992   |
| 02         | F2   | -0.133                       | 0.511   | -0.164 | 0.424   | -0.002                    | 0.988   | 0.097  | 0.916   |
| 03         | FCz  | -0.106                       | 0.474   | -0.170 | 0.404   | 0.018                     | 0.994   | 0.097  | 0.837   |
| 04         | Fp2  | -0.105                       | 0.701   | -0.160 | 0.848   | -0.028                    | 0.992   | -0.025 | 0.884   |
| 05         | Fz   | -0.068                       | 0.835   | -0.207 | 0.528   | 0.046                     | 0.915   | 0.094  | 0.945   |
| 06         | FC1  | -0.093                       | 0.535   | -0.096 | 0.626   | -0.009                    | 0.949   | 0.082  | 0.962   |
| 07         | AFz  | -0.088                       | 0.677   | -0.209 | 0.387   | 0.013                     | 0.928   | 0.011  | 0.999   |
| 08         | F1   | -0.091                       | 0.719   | -0.224 | 0.181   | 0.007                     | 0.999   | -0.011 | 0.996   |
| 09         | Fp1  | -0.054                       | 0.941   | -0.249 | 0.430   | -0.05                     | 0.906   | -0.083 | 0.991   |
| 10         | AF3  | -0.039                       | 0.913   | -0.195 | 0.295   | -0.064                    | 0.934   | -0.097 | 0.956   |
| 11         | F3   | -0.107                       | 0.704   | -0.174 | 0.472   | -0.047                    | 0.852   | -0.049 | 0.855   |
| 12         | F5   | -0.095                       | 0.633   | -0.147 | 0.455   | -0.059                    | 0.998   | -0.044 | 0.987   |
| 13         | FC5  | -0.092                       | 0.566   | -0.122 | 0.544   | -0.06                     | 0.990   | -0.031 | 0.876   |
| 14         | FC3  | -0.108                       | 0.606   | -0.097 | 0.621   | -0.082                    | 0.972   | 0.098  | 0.901   |
| 15         | C1   | -0.072                       | 0.706   | -0.103 | 0.534   | -0.026                    | 0.967   | 0.083  | 0.848   |
| 16         | F7   | -0.141                       | 0.713   | -0.199 | 0.460   | -0.214                    | 0.417   | -0.053 | 0.706   |
| 17         | FT7  | -0.151                       | 0.401   | -0.187 | 0.312   | -0.091                    | 0.887   | 0.025  | 0.921   |
| 18         | C3   | -0.106                       | 0.57    | -0.11  | 0.540   | -0.07                     | 0.735   | 0.105  | 0.953   |
| 19         | CP1  | -0.081                       | 0.674   | -0.087 | 0.620   | -0.086                    | 0.87    | 0.067  | 0.914   |
| 20         | C5   | -0.159                       | 0.33    | -0.149 | 0.442   | -0.131                    | 0.763   | 0.128  | 0.982   |
| 21         | T3   | -0.153                       | 0.659   | -0.202 | 0.35    | -0.071                    | 0.993   | -0.152 | 0.549   |
| 22         | TP7  | -0.208                       | 0.271   | -0.185 | 0.279   | -0.131                    | 0.925   | 0.124  | 0.788   |
| 23         | CP5  | -0.167                       | 0.388   | -0.146 | 0.457   | -0.133                    | 0.876   | 0.144  | 0.909   |
| 24         | P5   | -0.165                       | 0.426   | -0.219 | 0.214   | -0.125                    | 0.819   | 0.072  | 0.897   |
| 25         | P3   | -0.127                       | 0.456   | -0.155 | 0.329   | -0.045                    | 0.973   | 0.128  | 0.986   |
| 26         | A1   | -0.223                       | 0.256   | -0.212 | 0.217   | -0.13                     | 0.802   | -0.127 | 0.666   |
| 27         | T5   | -0.207                       | 0.400   | -0.292 | 0.094   | -0.124                    | 0.785   | 0.014  | 0.98    |
| 28         | P1   | -0.113                       | 0.53    | -0.168 | 0.311   | 0.009                     | 0.993   | 0.039  | 0.956   |
| 29         | P9   | -0.233                       | 0.219   | -0.259 | 0.117   | -0.054                    | 0.848   | 0.016  | 0.984   |

|    |     |        |       |        |       |        |       |        |       |
|----|-----|--------|-------|--------|-------|--------|-------|--------|-------|
| 30 | PO3 | -0.147 | 0.365 | -0.204 | 0.244 | 0.035  | 0.949 | 0.027  | 0.918 |
| 31 | Pz  | -0.13  | 0.435 | -0.198 | 0.525 | -0.071 | 0.887 | -0.012 | 0.931 |
| 32 | O1  | -0.157 | 0.544 | -0.311 | 0.085 | 0.114  | 0.692 | 0.087  | 0.805 |
| 33 | POz | -0.134 | 0.448 | -0.21  | 0.312 | -0.039 | 0.902 | 0.057  | 0.962 |
| 34 | Oz  | -0.151 | 0.579 | -0.273 | 0.136 | 0.012  | 0.931 | 0.139  | 0.538 |
| 35 | PO4 | -0.114 | 0.477 | -0.195 | 0.326 | -0.062 | 0.887 | 0.069  | 0.725 |
| 36 | O2  | -0.146 | 0.568 | -0.178 | 0.386 | 0.009  | 0.959 | 0.109  | 0.604 |
| 37 | P2  | -0.154 | 0.479 | -0.183 | 0.293 | -0.048 | 0.996 | 0.082  | 0.766 |
| 38 | CP2 | -0.173 | 0.457 | -0.174 | 0.288 | -0.018 | 0.993 | 0.133  | 0.901 |
| 39 | P4  | -0.13  | 0.443 | -0.191 | 0.256 | -0.088 | 0.937 | 0.069  | 0.841 |
| 40 | P10 | -0.051 | 0.84  | -0.223 | 0.255 | -0.145 | 0.503 | -0.063 | 0.727 |
| 41 | T6  | -0.064 | 0.754 | -0.149 | 0.357 | -0.184 | 0.395 | -0.035 | 0.803 |
| 42 | P6  | -0.102 | 0.589 | -0.169 | 0.293 | -0.109 | 0.8   | 0.004  | 0.977 |
| 43 | CP6 | -0.074 | 0.696 | -0.198 | 0.267 | -0.087 | 0.971 | 0      | 0.999 |
| 44 | A2  | 0.04   | 0.785 | -0.112 | 0.534 | -0.181 | 0.468 | -0.019 | 0.894 |
| 45 | TP8 | -0.078 | 0.661 | -0.111 | 0.474 | -0.116 | 0.854 | -0.012 | 0.986 |
| 46 | C6  | -0.117 | 0.479 | -0.063 | 0.707 | -0.095 | 0.839 | -0.028 | 0.913 |
| 47 | C4  | -0.131 | 0.484 | -0.111 | 0.542 | -0.079 | 0.829 | 0.081  | 0.979 |
| 48 | C2  | -0.132 | 0.541 | -0.185 | 0.280 | -0.016 | 0.911 | 0.093  | 0.98  |
| 49 | T4  | -0.065 | 0.632 | -0.149 | 0.467 | -0.146 | 0.897 | -0.162 | 0.852 |
| 50 | FC4 | -0.127 | 0.459 | -0.112 | 0.537 | -0.034 | 0.876 | 0.071  | 0.997 |
| 51 | FC2 | -0.076 | 0.684 | -0.157 | 0.369 | -0.02  | 0.956 | 0.086  | 0.997 |
| 52 | FT8 | -0.145 | 0.372 | -0.124 | 0.627 | -0.069 | 0.81  | 0.021  | 0.981 |
| 53 | FC6 | -0.135 | 0.466 | -0.129 | 0.498 | -0.053 | 0.911 | 0.053  | 0.991 |
| 54 | F8  | -0.127 | 0.539 | -0.146 | 0.768 | -0.193 | 0.36  | -0.053 | 0.765 |
| 55 | F6  | -0.14  | 0.565 | -0.114 | 0.681 | -0.072 | 0.918 | 0.029  | 0.987 |
| 56 | F4  | -0.055 | 0.746 | -0.139 | 0.619 | -0.076 | 0.797 | 0.052  | 0.765 |
| 57 | Cz  | -0.062 | 0.703 | -0.217 | 0.200 | 0.002  | 0.986 | 0.004  | 0.98  |

---
